# Supplementary material for: Bicyclic guanidine-catalyzed asymmetric Michael additions of 3-benzyl-substituted oxindoles to N-maleimides
Source: Royal Society of Chemistry journal article supplement (doi:10.1039/c2cc31587d), 2012-01-01

## Bicyclic guanidine-catalyzed asymmetric Michael additions of 3-benzyl-substituted oxindoles to *N*-maleimides

Lixin Li,<sup>†</sup> Wenchao Chen,<sup>†</sup> Wenguo Yang,<sup>†</sup> Yuanhang Pan,<sup>‡</sup> Hongjun Liu,<sup>‡</sup>  
Choon-Hong Tan,<sup>\*,†‡</sup> Zhiyong Jiang<sup>\*,†</sup>

<sup>†</sup>*Key Laboratory of Natural Medicine and Immuno-Engineering of Henan Province, Henan University, Kaifeng, Henan 475004, China,*

<sup>‡</sup>*Department of chemistry, National University of Singapore, 3 Science Drive 3, 117543, Singapore*

Email: chmjzy@henu.edu.cn; chmtanch@nus.edu.sg

### Supporting Information

|                                               |       |
|-----------------------------------------------|-------|
| 1. General Information                        | 2     |
| 2. Typical Experimental Procedures            | 3     |
| 3. Characterization of Products               | 4-22  |
| 4. X- Ray Crystal Data for Compound <b>4t</b> | 22-23 |
| 5. Copies of NMR Spectra                      | 24-67 |

## 1. General Information

### **General procedures and methods.**

All experiments were monitored by analytical thin layer chromatography (TLC). TLC was performed on pre-coated plates. After elution, plate was visualized under UV illumination at 254 nm for UV active material. Further visualization was achieved by staining KMnO<sub>4</sub>, ceric molybdate, or anisaldehyde solution. For those using the aqueous stains, the TLC plates were heated on a hot plate.

Columns for flash chromatography (FC) contained silica gel 200-300 mesh. Columns were packed as slurry of silica gel in petroleum ether and equilibrated solution using the appropriate solvent system. The elution was assisted by applying pressure of about 2 atm with an air pump.

Proton nuclear magnetic resonance (<sup>1</sup>H NMR), carbon NMR (<sup>13</sup>C NMR) spectra were recorded in CDCl<sub>3</sub> otherwise stated. <sup>1</sup>H (400 MHz), <sup>13</sup>C (100 MHz) with complete proton decoupling were performed on a 400 MHz spectrometer. Chemical shifts are reported in parts per million (ppm), using the residual solvent signal as an internal standard: CDCl<sub>3</sub> (<sup>1</sup>H NMR: δ 7.26, singlet; <sup>13</sup>C NMR: δ 77.0, triplet). Multiplicities were given as: *s* (singlet), *d* (doublet), *t* (triplet), *q* (quartet), *quintet*, *m* (multiplets), *dd* (doublet of doublets), *dt* (doublet of triplets), and *br* (broad). Coupling constants (*J*) were recorded in Hertz (Hz). The number of proton atoms (*n*) for a given resonance was indicated by *n*H. The number of carbon atoms (*n*) for a given resonance was indicated by *n*C. Low and high resolution mass spectra were obtained in EI and ESI modes. MS and HRMS were reported in units of mass of charge ratio (*m/z*).

### **Materials**

All commercial reagents were purchased of the highest purity grade. They were used without further purification unless specified. All solvents used, mainly petroleum ether (PE) and ethyl acetate (EtOAc), were distilled. All compounds synthesized were stored in a 0 °C freezer and light-sensitive compounds were protected with aluminium foil.

## 2. Typical Experimental Procedure

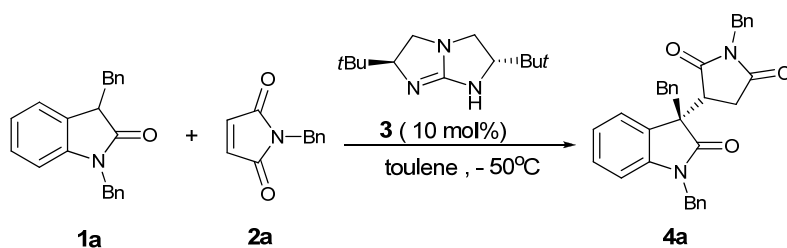

**2a** (22.4 mg, 0.12 mmol, 1.2 equiv.) and guanidine **3** (2.2 mg, 0.01 mmol, 0.1 equiv.) were dissolved in toluene (1.0 ml). The reaction mixtures were stirred at - 50 °C about 30 minutes. then added **1a** (31.3 mg, 0.1 mmol, 1.0 equiv.) into the solution at this temperature, the reaction mixtures were stirred about 40 hours at this temperature, and were directly loaded onto a short silica gel column, followed by gradient elution with PE/EA mixture (5/1-3/1 ratio). Removing the solvent in *vacuo*, afforded white solid **4a** (45.4 mg, 91% yield).

### 3. Characterization of Products

**4a**, white solid, M.p. 49.5 - 50.1 °C; 91% yield; 95% *ee*;  $[\alpha]_{20}^D = +150.0$  (*c* 0.25, CHCl<sub>3</sub>); <sup>1</sup>H NMR (400 MHz, CDCl<sub>3</sub>) δ 7.40 - 7.34 (m, 5H), 7.18 - 7.06 (m, 4H), 7.03 - 6.96 (m, 3H), 6.82 (d, *J* = 7.4 Hz, 1H), 6.78 (d, *J* = 7.2 Hz, 2H), 6.66 (t, *J* = 7.6 Hz, 1H), 6.60 (d, *J* = 6.8 Hz, 2H), 6.35 (d, *J* = 7.8 Hz, 1H), 4.79 (d, *J* = 15.9 Hz, 1H), 4.68 (dd, *J* = 41.7, 13.9 Hz, 2H), 4.44 (d, *J* = 15.9 Hz, 1H), 4.06 (d, *J* = 13.2 Hz, 1H), 3.56 (dd, *J* = 9.1, 5.0 Hz, 1H), 3.39 (d, *J* = 13.2 Hz, 1H), 2.73 (dd, *J* = 18.3, 9.1 Hz, 1H), 1.77 (dd, *J* = 18.3, 5.0 Hz, 1H); <sup>13</sup>C NMR (100 MHz, CDCl<sub>3</sub>) δ 176.9, 176.4, 174.9, 143.4, 135.4, 135.3, 134.7, 130.1, 129.1, 129.0, 128.7, 128.6, 128.6, 127.8, 127.3, 126.6, 126.2, 124.2, 123.0, 109.5, 55.6, 44.7, 43.6, 42.6, 41.2, 31.3; LRMS (ESI) *m/z* 501.2 (M+H<sup>+</sup>); HRMS (ESI) *m/z* 501.2174 (M+H<sup>+</sup>), Calc. for C<sub>33</sub>H<sub>29</sub>N<sub>2</sub>O<sub>3</sub> 501.2173.

The *ee* was determined by HPLC analysis. CHIRALCEL IA (4.6 mm i.d. x 250 mm); Hexane/2-propanol = 70/30; flow rate 1.0 ml/min; 25 °C; 254 nm; retention time: 9.3 min (minor) and 11.7 min (major).

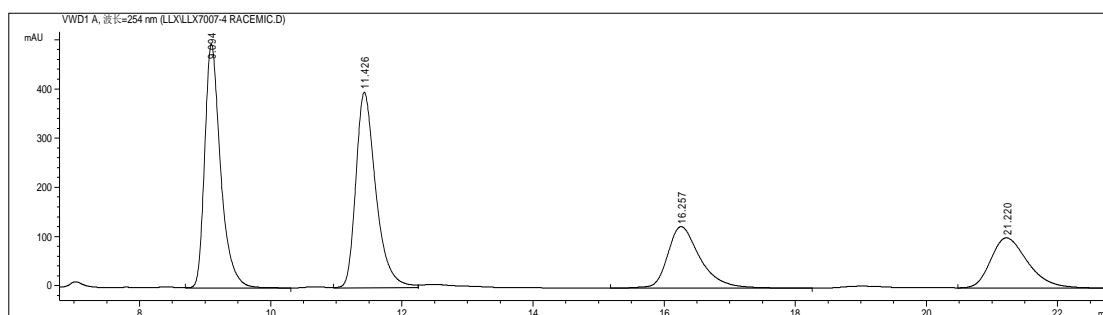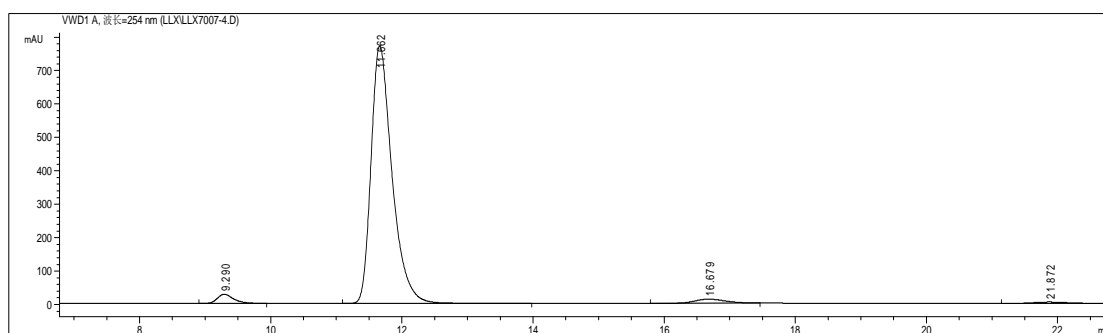

**4b**, white solid, M.p. 99.1 - 101.9 °C; 97% yield; 93% *ee*;  $[\alpha]_{20}^D = +131.0$  (*c* 0.58, CHCl<sub>3</sub>); <sup>1</sup>H NMR (400 MHz, CDCl<sub>3</sub>) δ 7.48 (d, *J* = 8.3 Hz, 2H), 7.26 (s, 1H), 7.24 (s, 1H), 7.18 - 6.96 (m, 7H), 6.78 (t, *J* = 6.9 Hz, 3H), 6.68 (t, *J* = 7.6 Hz, 1H), 6.60 (d, *J* = 6.9 Hz, 2H), 6.36 (d, *J* = 7.9 Hz, 1H), 4.79 (d, *J* = 15.9 Hz, 1H), 4.62 (dd, *J* = 43.4, 14.0 Hz, 2H), 4.44 (d, *J* = 15.9 Hz,

1H), 4.03 (d,  $J = 13.2$  Hz, 1H), 3.56 (dd,  $J = 9.1, 5.0$  Hz, 1H), 3.38 (d,  $J = 13.2$  Hz, 1H), 2.74 (dd,  $J = 18.3, 9.1$  Hz, 1H), 1.78 (dd,  $J = 18.3, 5.0$  Hz, 1H);  $^{13}\text{C}$  NMR (100 MHz,  $\text{CDCl}_3$ )  $\delta$  176.8, 176.4, 174.8, 143.4, 135.2, 134.6, 134.4, 131.8, 130.9, 130.1, 129.2, 128.7, 127.8, 127.4, 126.6, 126.2, 124.0, 122.9, 122.2, 109.6, 55.6, 44.7, 43.6, 41.9, 41.2, 31.3; LRMS (ESI)  $m/z$  579.1 ( $\text{M}+\text{H}^+$ ); HRMS (ESI)  $m/z$  579.1296 ( $\text{M}+\text{H}^+$ ), Calc. for  $\text{C}_{33}\text{H}_{28}\text{BrN}_2\text{O}_3$  579.1278.

The *ee* was determined by HPLC analysis. CHIRALCEL IA (4.6 mm i.d. x 250 mm); Hexane/2-propanol = 70/30; flow rate 1.0 ml/min; 25 °C; 254 nm; retention time: 11.2 min (minor) and 14.2 min (major).

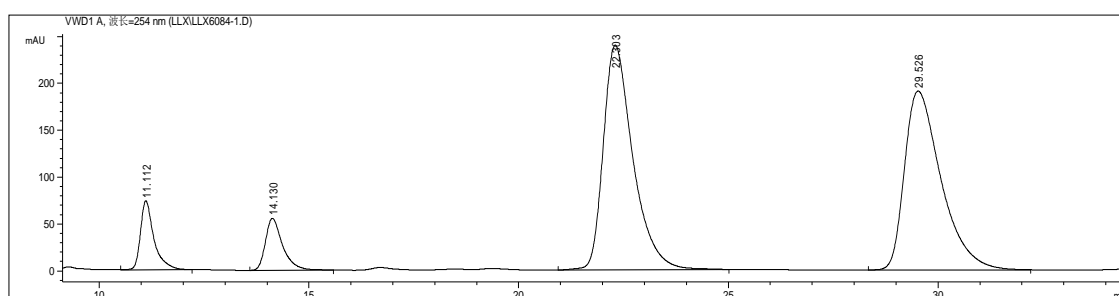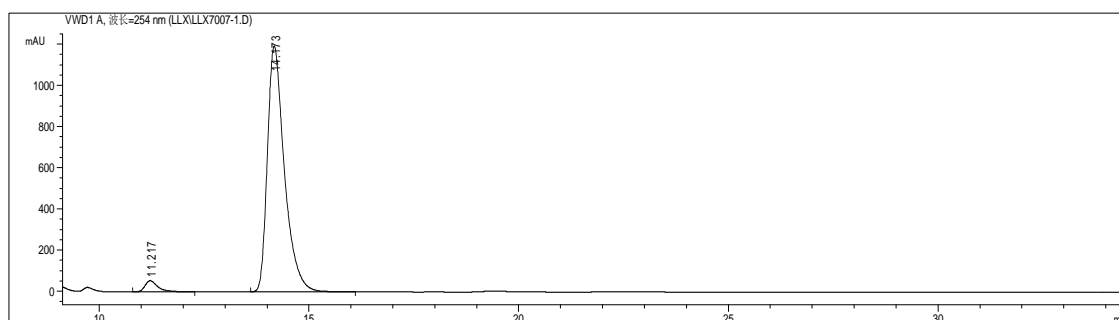

**4c**, white solid, M.p. 101.1 - 102.3 °C; 91% yield; 92% *ee*;  $[\alpha]_{20}^{\text{D}} = +109.8$  ( $c$  0.86,  $\text{CHCl}_3$ );  $^1\text{H}$  NMR (400 MHz,  $\text{CDCl}_3$ )  $\delta$  7.33 (d,  $J = 8.6$  Hz, 1H), 7.17 - 7.06 (m, 2H), 7.03 - 6.96 (m, 2H), 6.87 (d,  $J = 8.6$  Hz, 1H), 6.83 (d,  $J = 7.3$  Hz, 1H), 6.78 (d,  $J = 7.3$  Hz, 1H), 6.67 (t,  $J = 7.4$  Hz, 1H), 6.59 (d,  $J = 6.9$  Hz, 1H), 6.34 (d,  $J = 7.8$  Hz, 1H), 4.78 (d,  $J = 15.9$  Hz, 1H), 4.61 (dd,  $J = 39.6, 13.8$  Hz, 1H), 4.44 (d,  $J = 15.9$  Hz, 1H), 4.05 (d,  $J = 13.2$  Hz, 1H), 3.83 (s, 2H), 3.54 (dd,  $J = 9.1, 5.0$  Hz, 1H), 3.38 (d,  $J = 13.2$  Hz, 1H), 2.71 (dd,  $J = 18.3, 9.1$  Hz, 1H), 1.74 (dd,  $J = 18.3, 5.0$  Hz, 1H);  $^{13}\text{C}$  NMR (100 MHz,  $\text{CDCl}_3$ )  $\delta$  177.0, 176.5, 175.0, 159.4, 143.3, 135.3, 134.7, 130.6, 130.1, 129.0, 128.6, 127.8, 127.3, 126.6, 126.2, 124.2, 122.9, 113.9, 109.5, 55.7, 55.3, 44.6, 43.6, 42.0, 41.2, 31.3; LRMS (ESI)  $m/z$  553.2 ( $\text{M}+\text{Na}^+$ ); HRMS (ESI)  $m/z$  553.2115 ( $\text{M}+\text{Na}^+$ ), Calc. for  $\text{C}_{34}\text{H}_{30}\text{N}_2\text{NaO}_4$  553.2098.

The *ee* was determined by HPLC analysis. CHIRALCEL IA (4.6 mm i.d. x 250 mm); Hexane/2-propanol = 70/30; flow rate 1.0 ml/min; 25 °C; 254 nm; retention time: 11.7 min (minor) and 14.5 min (major).

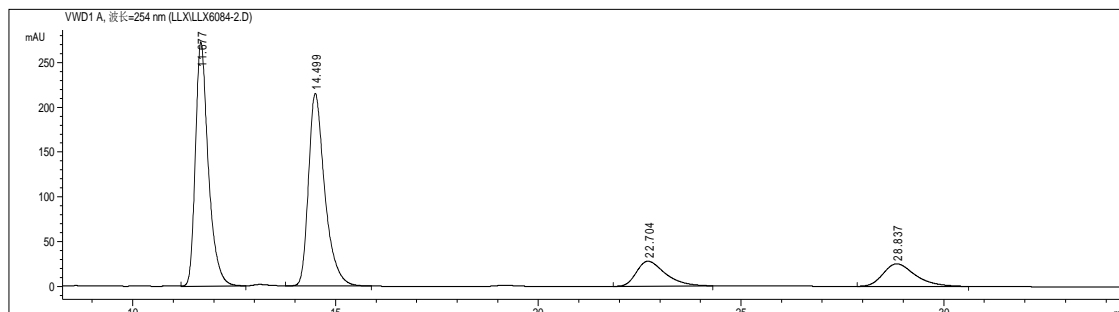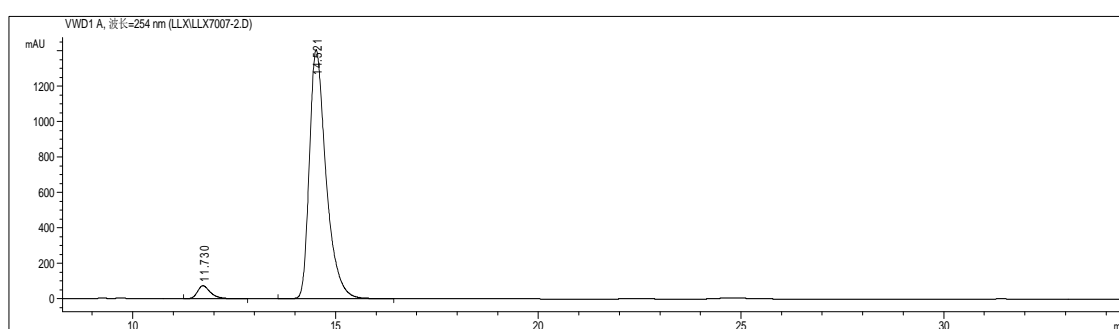

**4d**, white solid, M.p. 108.6 - 109.2 °C; 88% yield; 92% *ee*,  $[\alpha]_{20}^D = +105.0$  (*c* 0.47, CHCl<sub>3</sub>); <sup>1</sup>H NMR (400 MHz, CDCl<sub>3</sub>) δ 7.41 (dd, *J* = 7.9, 1.2 Hz, 1H), 7.21 - 7.07 (m, 9H), 7.01 (t, *J* = 7.6 Hz, 2H), 6.92 (t, *J* = 7.2 Hz, 1H), 6.82 (d, *J* = 7.2 Hz, 2H), 6.61 (d, *J* = 6.8 Hz, 2H), 6.41 (d, *J* = 8.4 Hz, 1H), 4.85 (d, *J* = 16.9 Hz, 3H), 4.48 (d, *J* = 15.9 Hz, 1H), 4.11 (d, *J* = 13.2 Hz, 1H), 3.65 (dd, *J* = 9.1, 5.7 Hz, 1H), 3.42 (d, *J* = 12.0 Hz, 1H), 2.82 (dd, *J* = 18.2, 9.1 Hz, 1H), 1.93 (dd, *J* = 18.2, 5.7 Hz, 1H); <sup>13</sup>C NMR (100 MHz, CDCl<sub>3</sub>) δ 176.8, 176.4, 174.7, 143.4, 135.2, 134.6, 133.2, 132.3, 130.1, 129.7, 129.2, 129.1, 129.0, 128.6, 127.8, 127.3, 126.8, 126.6 (two peaks), 126.4, 124.4, 123.0, 109.6, 55.4, 45.0, 43.6, 41.2, 40.1, 31.3; LRMS (EI) *m/z* 534.2; HRMS (EI) *m/z* 534.1705, Calc. for C<sub>33</sub>H<sub>27</sub>N<sub>2</sub>O<sub>3</sub>Cl 534.1710.

The *ee* was determined by HPLC analysis. CHIRALCEL IA (4.6 mm i.d. x 250 mm); Hexane/2-propanol = 70/30; flow rate 1.0 ml/min; 25 °C; 254 nm; retention time: 9.3 min (minor) and 13.5 min (major).

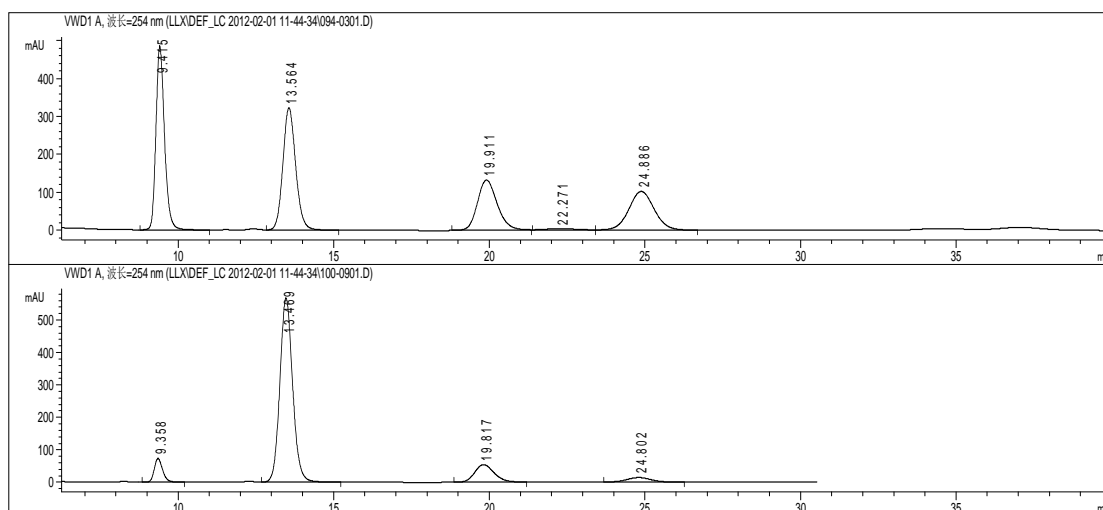

**4e**, white solid, M.p. 105.3 - 105.8 °C; 92% yield; 92% *ee*,  $[\alpha]_{20}^D = +115.1$  (*c* 0.31, CHCl<sub>3</sub>); <sup>1</sup>H NMR (400 MHz, CDCl<sub>3</sub>) δ 7.33 - 7.27 (m, 1H), 7.16 - 7.00 (m, 9H), 6.94 - 6.86 (m, 3H), 6.80 (d, *J* = 7.2 Hz, 2H), 6.59 (d, *J* = 6.8 Hz, 2H), 6.38 (d, *J* = 7.8 Hz, 1H), 4.85 (d, *J* = 15.9 Hz, 1H), 4.74 (q, *J* = 14.9 Hz, 2H), 4.46 (d, *J* = 15.9 Hz, 1H), 4.13 (d, *J* = 13.2 Hz, 1H), 3.79 (s, 3H), 3.59 (dd, *J* = 9.1, 5.6 Hz, 1H), 3.40 (d, *J* = 13.2 Hz, 1H), 2.77 (dd, *J* = 18.1, 9.1 Hz, 1H), 1.83 (dd, *J* = 18.1, 5.6 Hz, 1H); <sup>13</sup>C NMR (100 MHz, CDCl<sub>3</sub>) δ 176.9, 176.5, 174.8, 157.1, 143.5, 135.4, 134.7, 130.2, 129.1 (two peaks), 129.0, 128.6, 127.8, 127.3, 126.6 (two peaks), 126.5, 124.5, 123.0 (two peaks), 120.3, 110.4, 109.5, 55.6, 55.3, 44.8, 43.6, 41.3, 37.9, 31.3; LRMS (EI) *m/z* 530.2; HRMS (EI) *m/z* 530.2205, Calc. for C<sub>34</sub>H<sub>30</sub>N<sub>2</sub>O<sub>4</sub> 530.2206.

The *ee* was determined by HPLC analysis. CHIRALCEL IA (4.6 mm i.d. x 250 mm); Hexane/2-propanol = 70/30; flow rate 1.0 ml/min; 25 °C; 254 nm; retention time: 9.8 min (minor) and 13.1 min (major).

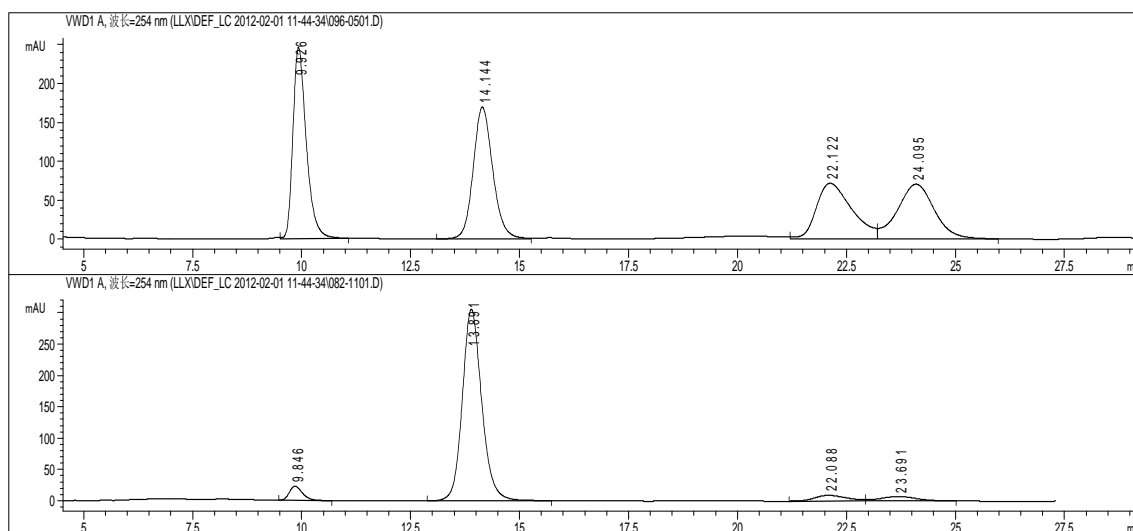

**4f**, white solid, M.p. 151.6 - 152.7 °C; 92% yield; 93% *ee*;  $[\alpha]_{20}^D = +132.7$  (*c* 0.075, CHCl<sub>3</sub>); <sup>1</sup>H NMR (400 MHz, CDCl<sub>3</sub>) δ 7.53 - 7.49 (m, 2H), 7.46 - 7.38 (m, 2H), 7.26 - 7.22 (m, 2H), 7.19 - 7.08 (m, 6H), 7.03 (t, *J* = 7.5 Hz, 2H), 6.86 (d, *J* = 7.2 Hz, 2H), 6.64 (d, *J* = 6.8 Hz, 2H), 6.46 (d, *J* = 7.5 Hz, 1H), 4.90 (d, *J* = 15.9 Hz, 1H), 4.51 (d, *J* = 15.9 Hz, 1H), 4.13 (d, *J* = 13.1 Hz, 1H), 3.76 (dd, *J* = 9.2, 5.1 Hz, 1H), 3.48 (d, *J* = 13.3 Hz, 1H), 2.91 (dd, *J* = 18.4, 9.2 Hz, 1H), 2.01 (dd, *J* = 18.4, 5.1 Hz, 1H); <sup>13</sup>C NMR (100 MHz, CDCl<sub>3</sub>) δ 176.5, 176.3, 174.2, 143.6, 135.2, 134.6, 131.6, 130.2, 129.5, 129.3, 128.9, 128.7, 127.9, 127.4, 126.7, 126.6 (two peaks), 126.4, 124.2, 123.0, 109.8, 55.8, 45.1, 43.7, 41.2, 31.5; LRMS (ESI) *m/z* 509.2 (M+Na<sup>+</sup>); HRMS (ESI) *m/z* 509.1832 (M+Na<sup>+</sup>), Calc. for C<sub>32</sub>H<sub>26</sub>N<sub>2</sub>NaO<sub>3</sub> 509.1836.

The *ee* was determined by HPLC analysis. CHIRALCEL IA (4.6 mm i.d. x 250 mm); Hexane/2-propanol = 70/30; flow rate 1.0 ml/min; 25 °C; 254 nm; retention time: 11.7 min (minor) and 19.7 min (major).

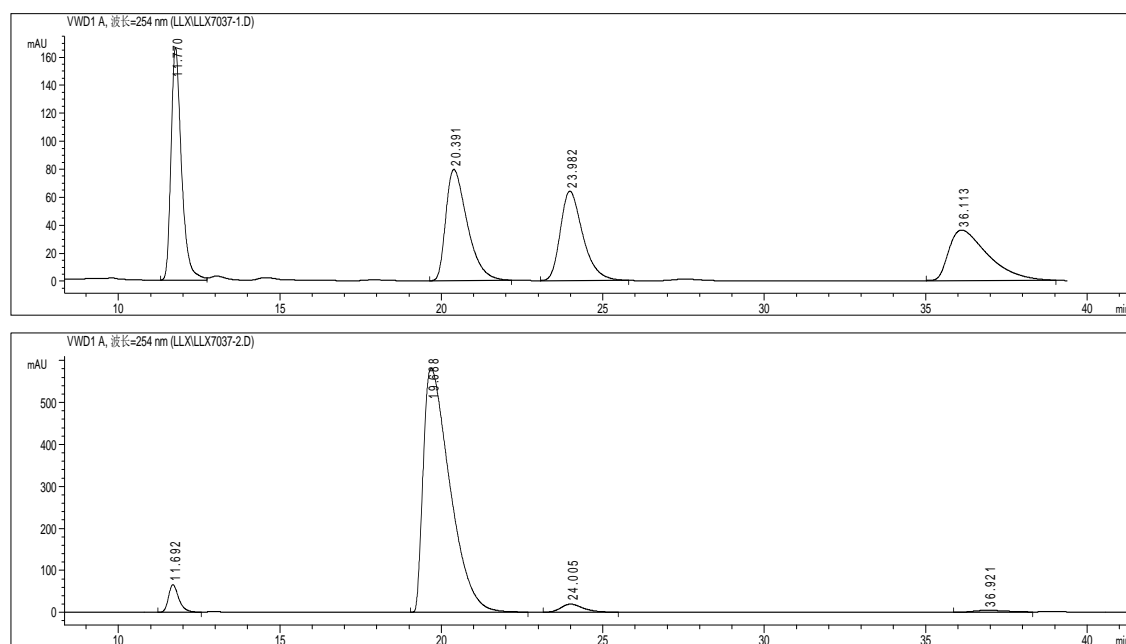

**4g**, white solid, M.p. 150.1 - 151.2 °C; 90% yield; 90% *ee*;  $[\alpha]_{20}^D = +181.3$  (*c* 0.30, CHCl<sub>3</sub>); <sup>1</sup>H NMR (400 MHz, CDCl<sub>3</sub>) δ 7.52 (d, *J* = 8.6 Hz, 2H), 7.39 (d, *J* = 7.3 Hz, 1H), 7.20 - 7.10 (m, 8H), 7.03 (t, *J* = 7.6 Hz, 2H), 6.87 - 6.82 (m, 2H), 6.62 (d, *J* = 6.9 Hz, 2H), 6.45 (d, *J* = 7.6 Hz, 1H), 4.91 (d, *J* = 15.9 Hz, 1H), 4.50 (d, *J* = 15.9 Hz, 1H), 4.14 (d, *J* = 13.3 Hz, 1H), 3.75 (dd, *J* = 9.2, 5.0 Hz, 1H), 3.48 (d, *J* = 13.3 Hz, 1H), 2.90 (dd, *J* = 18.4, 9.2 Hz, 1H), 1.98 (dd, *J* = 18.4, 5.0 Hz, 1H), 1.35 (s, 9H); <sup>13</sup>C NMR (100 MHz, CDCl<sub>3</sub>) δ 176.5 (two peaks),



174.5, 151.9, 143.6, 135.2, 134.6, 130.2, 129.5, 128.8, 128.7, 127.9, 127.4, 126.7, 126.6, 126.4, 126.3, 126.0, 124.3, 123.0, 109.8, 55.8, 45.0, 43.6, 41.2, 34.7, 31.5, 31.2; LRMS (EI)  $m/z$  542.3; HRMS (EI)  $m/z$  542.2571, Calc. for  $C_{36}H_{34}N_2O_3$  542.2569.

The *ee* was determined by HPLC analysis. CHIRALCEL IA (4.6 mm i.d. x 250 mm); Hexane/2-propanol = 70/30; flow rate 1.0ml/min; 25 °C; 254 nm; retention time: 9.0 min (minor) and 11.8 min (major).

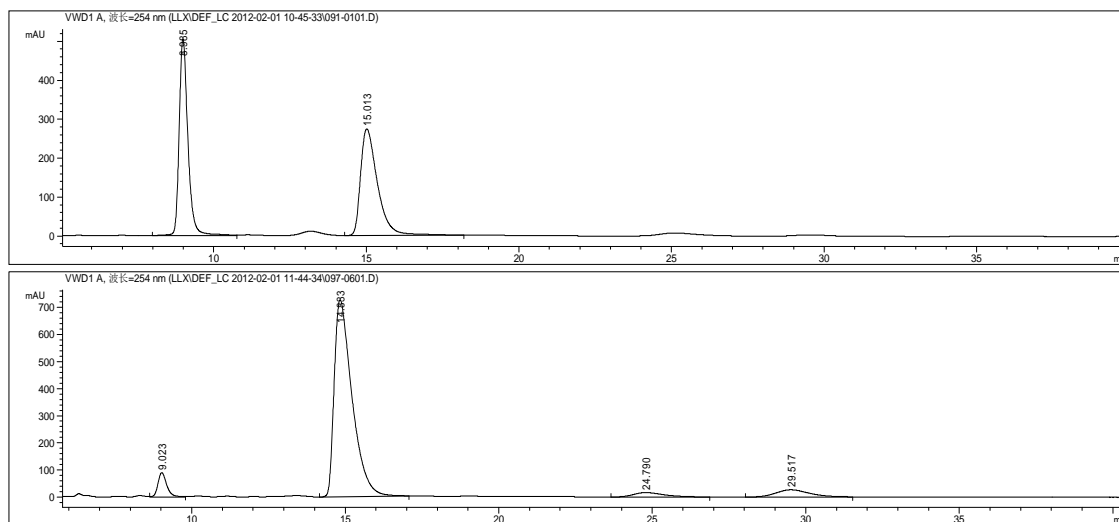

**4h**, white solid, M.p. 157.8 - 158.6 °C; 89% yield, 92% *ee*;  $[\alpha]_{20}^D = +46.1$  (*c* 0.23,  $CHCl_3$ );  $^1H$  NMR (400 MHz,  $CDCl_3$ )  $\delta$  7.57 (d,  $J = 8.7$  Hz, 1H), 7.43 (t,  $J = 1.8$  Hz, 1H), 7.37 (dd,  $J = 14.7, 6.9$  Hz, 2H), 7.23 - 7.09 (m, 7H), 7.03 (t,  $J = 7.6$  Hz, 2H), 6.84 (d,  $J = 7.3$  Hz, 2H), 6.62 (d,  $J = 7.0$  Hz, 2H), 6.46 (d,  $J = 7.6$  Hz, 1H), 4.90 (d,  $J = 15.9$  Hz, 1H), 4.50 (d,  $J = 15.9$  Hz, 1H), 4.09 (d,  $J = 13.3$  Hz, 1H), 3.75 (dd,  $J = 9.2, 5.2$  Hz, 1H), 3.46 (d,  $J = 13.3$  Hz, 1H), 2.91 (dd,  $J = 18.4, 9.3$  Hz, 1H), 2.03 (dd,  $J = 18.8, 4.8$  Hz, 1H);  $^{13}C$  NMR (100 MHz,  $CDCl_3$ )  $\delta$  176.4, 175.8, 173.8, 143.6, 135.1, 134.6, 132.7, 132.0, 130.4, 130.2, 129.7, 129.6, 128.7, 127.9, 127.4, 126.8, 126.6, 126.4, 125.2, 124.1, 123.1, 122.6, 109.9, 55.7, 45.2, 43.7, 41.2, 31.5; LRMS (EI)  $m/z$  564.1; HRMS (EI)  $m/z$  564.1054, Calc. for  $C_{32}H_{25}N_2O_3Br$  564.1049.

The *ee* was determined by HPLC analysis. CHIRALCEL IA (4.6 mm i.d. x 250 mm); Hexane/2-propanol = 70/30; flow rate 1.0ml/min; 25 °C; 254 nm; retention time: 10.9 min (minor) and 15.5 min (major).

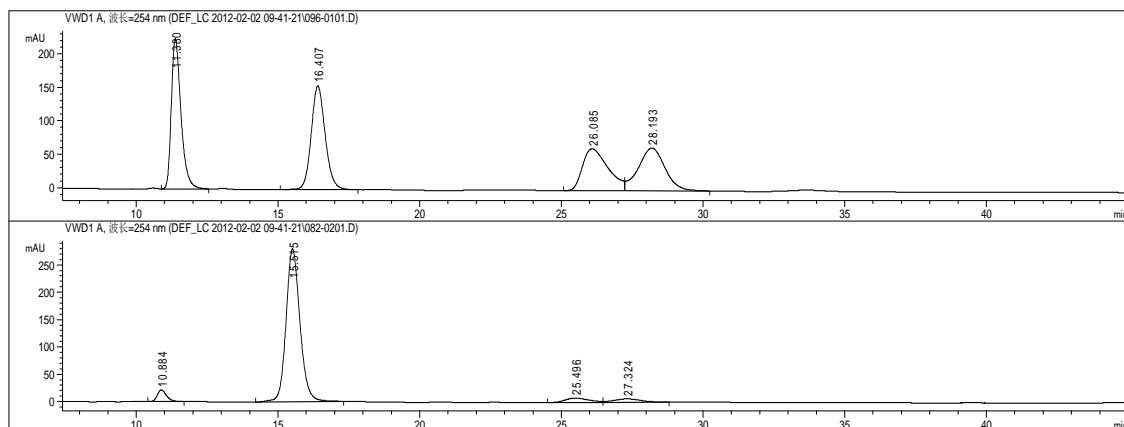

**4i**, white powder, M.p. 168.7 - 170.2 °C; 97% yield; 91% *ee*;  $[\alpha]_{20}^D = +151.7$  (*c* 0.29, CHCl<sub>3</sub>); <sup>1</sup>H NMR (400 MHz, CDCl<sub>3</sub>) δ 7.31 - 7.27 (m, 1H), 7.19 - 7.06 (m, 5H), 7.01 (t, *J* = 7.5 Hz, 3H), 6.83 (d, *J* = 7.2 Hz, 2H), 6.61 (d, *J* = 6.7 Hz, 2H), 6.41 (d, *J* = 7.7 Hz, 1H), 4.84 (d, *J* = 15.9 Hz, 1H), 4.47 (d, *J* = 15.9 Hz, 1H), 4.14 (d, *J* = 13.2 Hz, 1H), 3.64 - 3.50 (m, 3H), 3.42 (d, *J* = 13.3 Hz, 1H), 2.70 (dd, *J* = 18.2, 9.1 Hz, 1H), 1.77 (dd, *J* = 18.2, 5.2 Hz, 1H), 1.18 (t, *J* = 7.2 Hz, 3H); <sup>13</sup>C NMR (100 MHz, CDCl<sub>3</sub>) δ 177.1, 176.5, 175.0, 143.5, 135.3, 134.7, 130.2, 129.3, 128.6, 127.8, 127.3, 126.6, 126.5, 124.2, 122.9, 109.6, 55.5, 44.8, 43.6, 41.2, 33.8, 31.3, 13.0; LRMS (ESI) *m/z* 461.2 (M+Na<sup>+</sup>); HRMS (ESI) *m/z* 461.1841 (M+Na<sup>+</sup>), Calc. for C<sub>28</sub>H<sub>26</sub>N<sub>2</sub>NaO<sub>3</sub> 461.1836.

The *ee* was determined by HPLC analysis. CHIRALCEL IA (4.6 mm i.d. x 250 mm); Hexane/2-propanol = 70/30; flow rate 1.0ml/min; 25 °C; 254 nm; retention time: 8.5 min (minor) and 12.3 min (major).

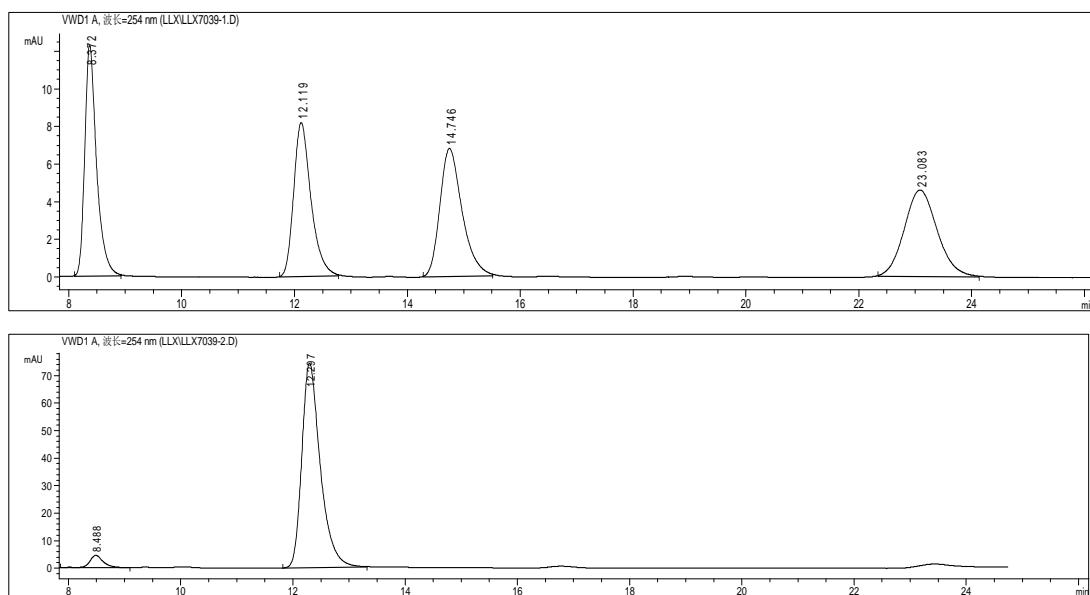

**4j**, white solid, M.p. 77.6 - 78.4 °C; 89% yield; 90% *ee*;  $[\alpha]_{20}^D = +169.1$  (*c* 0.23, CHCl<sub>3</sub>); <sup>1</sup>H NMR (400 MHz, CDCl<sub>3</sub>) δ 7.41 - 7.32 (m, 5H), 7.23 - 7.17 (m, 3H), 7.10 (d, *J* = 8.4 Hz, 2H), 7.03 (td, *J* = 7.8, 1.1 Hz, 1H), 6.79 (d, *J* = 7.0 Hz, 1H), 6.67 - 6.59 (m, 5H), 6.41 (d, *J* = 7.9 Hz, 1H), 4.89 (d, *J* = 15.8 Hz, 1H), 4.73 (d, *J* = 13.9 Hz, 1H), 4.61 (d, *J* = 13.9 Hz, 1H), 4.41 (d, *J* = 15.8 Hz, 1H), 4.02 (d, *J* = 13.3 Hz, 1H), 3.53 (dd, *J* = 9.1, 5.0 Hz, 1H), 3.34 (d, *J* = 13.3 Hz, 1H), 2.72 (dd, *J* = 18.3, 9.1 Hz, 1H), 1.73 (dd, *J* = 18.3, 5.0 Hz, 1H); <sup>13</sup>C NMR (100 MHz, CDCl<sub>3</sub>) δ 176.8, 176.1, 174.8, 143.3, 135.4, 134.5, 134.3, 131.8, 130.9, 129.3, 129.1, 128.7 (two peaks), 128.1, 127.5, 126.6, 125.7, 124.1, 123.1, 120.8, 109.6, 55.4, 44.6, 43.7, 42.6, 40.4, 31.2; LRMS (ESI) *m/z* 601.1 (M+Na<sup>+</sup>); HRMS (ESI) *m/z* 579.1283, Calc. for C<sub>33</sub>H<sub>28</sub>BrN<sub>2</sub>O<sub>3</sub> 579.1278.

The *ee* was determined by HPLC analysis. CHIRALCEL IA (4.6 mm i.d. x 250 mm); Hexane/2-propanol = 70/30; flow rate 1.0 ml/min; 25 °C; 254 nm; retention time: 10.8 min (minor) and 18.9 min (major).

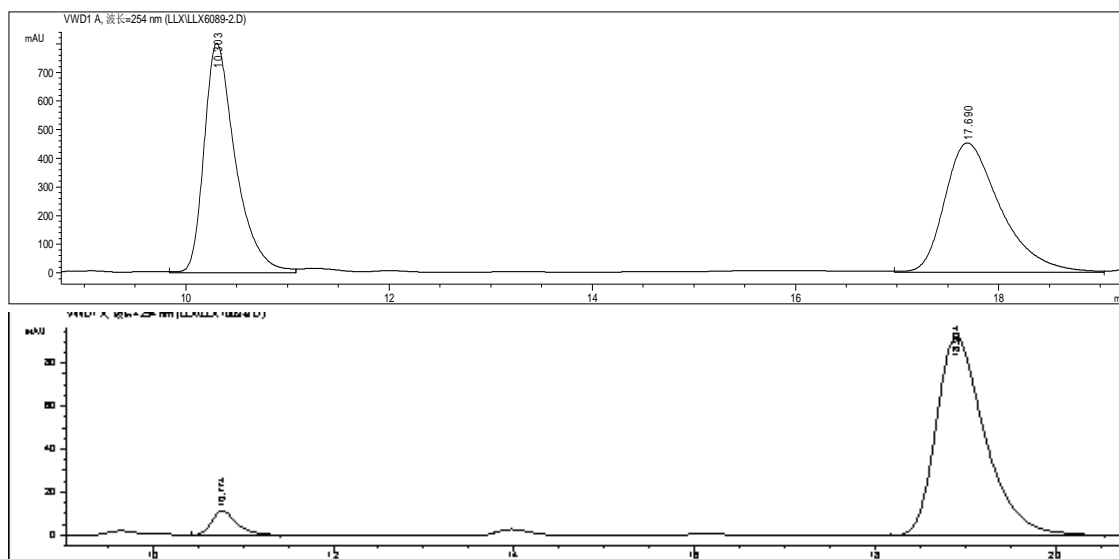

**4k**, white solid, M.p. 80.2 - 81.8 °C; 88% yield; 92% *ee*;  $[\alpha]_{20}^D = +170.5$  (*c* 0.11, CHCl<sub>3</sub>); <sup>1</sup>H NMR (400 MHz, CDCl<sub>3</sub>) δ 7.40 - 7.33 (m, 5H), 7.23 - 7.16 (m, 4H), 7.03 (td, *J* = 7.8, 1.0 Hz, 1H), 6.93 (s, 1H), 6.83 (t, *J* = 7.8 Hz, 1H), 6.77 (d, *J* = 7.2 Hz, 1H), 6.72 - 6.67 (m, 3H), 6.65 (d, *J* = 7.5 Hz, 1H), 6.41 (d, *J* = 7.9 Hz, 1H), 4.79 (d, *J* = 15.8 Hz, 1H), 4.73 (d, *J* = 13.9 Hz, 1H), 4.65 - 4.57 (m, 1H), 4.49 (d, *J* = 15.8 Hz, 1H), 4.03 (d, *J* = 13.2 Hz, 1H), 3.53 (dd, *J* = 9.1, 5.0 Hz, 1H), 3.34 (d, *J* = 13.3 Hz, 1H), 2.73 (dd, *J* = 18.3, 9.1 Hz, 1H), 1.73 (dd, *J* = 18.3, 5.0 Hz, 1H); <sup>13</sup>C NMR (100 MHz, CDCl<sub>3</sub>) δ 176.8, 176.1, 174.8, 143.3, 137.6, 135.4, 134.7,

132.9, 129.8, 129.3 (two peaks), 129.1, 128.8 (two peaks), 128.7, 128.1, 127.5, 126.6, 125.7, 124.1, 123.1, 121.8, 109.6, 55.4, 44.4, 43.7, 42.6, 40.7, 31.3; LRMS (ESI)  $m/z$  579.1 ( $M+H^+$ ); HRMS (ESI)  $m/z$  579.1290 ( $M+H^+$ ), Calc. for  $C_{33}H_{28}BrN_2O_3$  579.1278.

The *ee* was determined by HPLC analysis. CHIRALCEL IA (4.6 mm i.d. x 250 mm); Hexane/2-propanol = 70/30; flow rate 1.0 ml/min; 25 °C; 254 nm; retention time: 10.2 min (minor) and 13.7 min (major).

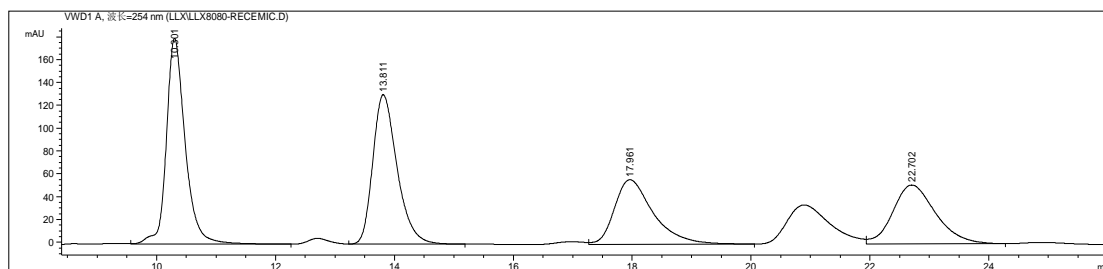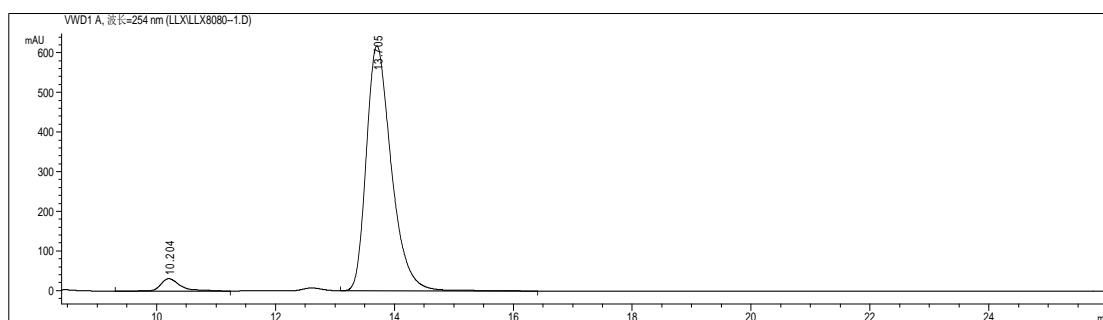

**4l**, white solid, M.p. 85.4 - 86.4 °C; 93% yield; 99% *ee*;  $[\alpha]_{20}^D = +80.0$  (*c* 0.24,  $CHCl_3$ );  $^1H$  NMR (400 MHz,  $CDCl_3$ )  $\delta$  7.41 - 7.31 (m, 6H), 7.24 - 7.18 (m, 3H), 7.03 (t,  $J = 7.4$  Hz, 1H), 6.98 - 6.86 (m, 6H), 6.62 (t,  $J = 7.6$  Hz, 1H), 6.50 (d,  $J = 7.8$  Hz, 1H), 4.81 - 4.62 (m, 4H), 4.32 (d,  $J = 13.8$  Hz, 1H), 3.68 (d,  $J = 13.9$  Hz, 1H), 3.59 (dd,  $J = 9.1, 5.1$  Hz, 1H), 2.70 (dd,  $J = 18.2, 9.1$  Hz, 1H), 1.74 (dd,  $J = 18.2, 5.1$  Hz, 1H);  $^{13}C$  NMR (100 MHz,  $CDCl_3$ )  $\delta$  176.8, 176.5, 174.8, 143.1, 135.4 (two peaks), 135.0, 132.9, 131.2, 129.2, 129.1, 128.7, 128.6, 128.3, 128.0, 127.6, 127.2, 126.8, 125.8, 125.7, 125.2, 122.8, 109.1, 54.8, 44.2, 44.0, 42.5, 39.2, 31.2; LRMS (ESI)  $m/z$  601.1 ( $M+Na^+$ ); HRMS (ESI)  $m/z$  579.1291 ( $M+H^+$ ), Calc. for  $C_{33}H_{28}BrN_2O_3$  579.1278.

The *ee* was determined by HPLC analysis. CHIRALCEL IA (4.6 mm i.d. x 250 mm); Hexane/2-propanol = 70/30; flow rate 1.0 ml/min; 25 °C; 254 nm; retention time: 13.0 min (major).

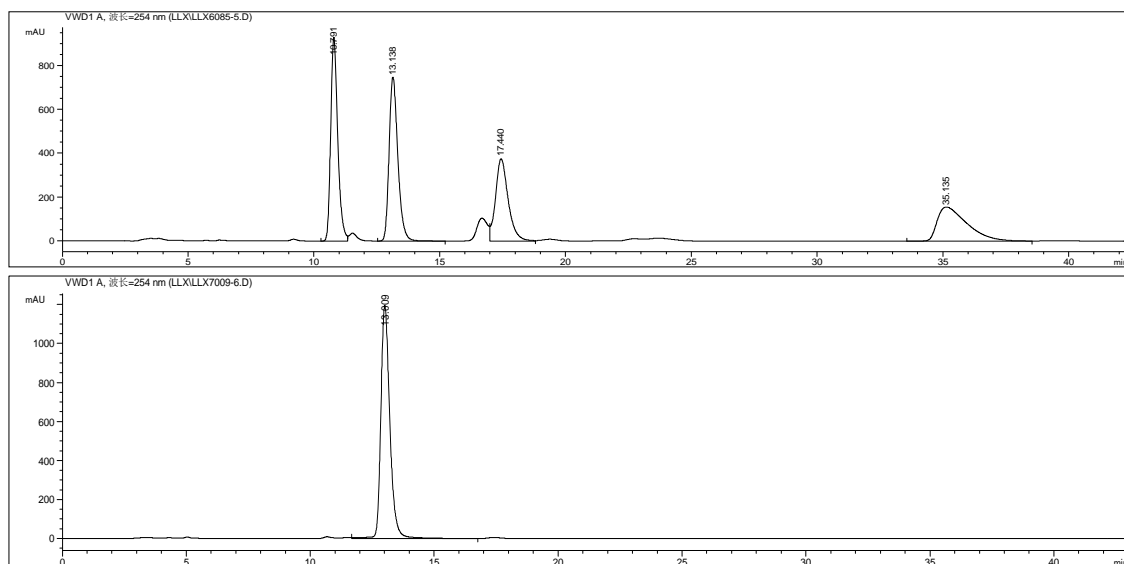

**4m**, white solid, M.p. 78.6 - 79.2 °C; 81% yield; 90% *ee*;  $[\alpha]_{20}^D = +183.6$  ( $c$  0.07,  $\text{CHCl}_3$ );  $^1\text{H}$  NMR (400 MHz,  $\text{CDCl}_3$ )  $\delta$  7.40 - 7.33 (m, 5H), 7.20 - 7.18 (m, 3H), 7.05 - 7.01 (m, 1H), 6.94 (d,  $J = 8.4$  Hz, 2H), 6.79 (d,  $J = 6.9$  Hz, 1H), 6.72 - 6.57 (m, 5H), 6.41 (d,  $J = 7.8$  Hz, 1H), 4.88 (d,  $J = 15.8$  Hz, 1H), 4.73 (d,  $J = 13.9$  Hz, 1H), 4.62 (d,  $J = 13.9$  Hz, 1H), 4.41 (d,  $J = 15.8$  Hz, 1H), 4.04 (d,  $J = 13.3$  Hz, 1H), 3.53 (dd,  $J = 9.1, 5.0$  Hz, 1H), 3.35 (d,  $J = 13.3$  Hz, 1H), 2.72 (dd,  $J = 18.3, 9.1$  Hz, 1H), 1.73 (dd,  $J = 18.3, 5.0$  Hz, 1H);  $^{13}\text{C}$  NMR (100 MHz,  $\text{CDCl}_3$ )  $\delta$  176.9, 176.2, 174.8, 143.3, 135.4, 134.5, 133.8, 132.6, 131.5, 129.3, 129.1, 128.7, 128.6, 128.1, 128.0, 127.5, 126.6, 125.8, 124.1, 123.1, 109.6, 55.4, 44.6, 43.7, 42.6, 40.4, 31.2; LRMS (ESI)  $m/z$  557.2 ( $\text{M}+\text{Na}^+$ ); HRMS (ESI)  $m/z$  557.1607 ( $\text{M}+\text{Na}^+$ ), Calc. for  $\text{C}_{33}\text{H}_{27}\text{ClN}_2\text{NaO}_3$  557.1602.

The *ee* was determined by HPLC analysis. CHIRALCEL IA (4.6 mm i.d. x 250 mm); Hexane/2-propanol = 70/30; flow rate 1.0 ml/min; 25 °C; 254 nm; retention time: 9.3 min (minor) and 16.2 min (major).

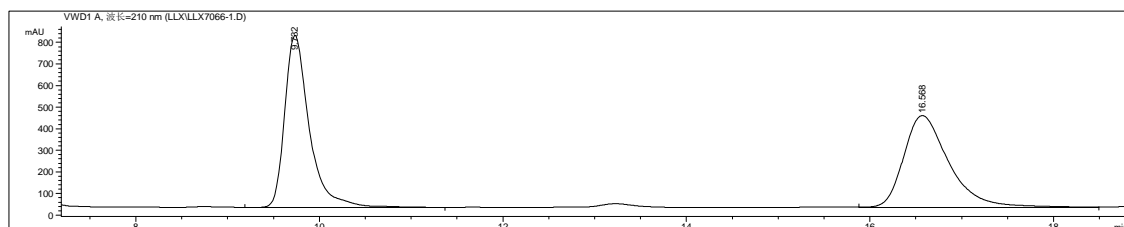

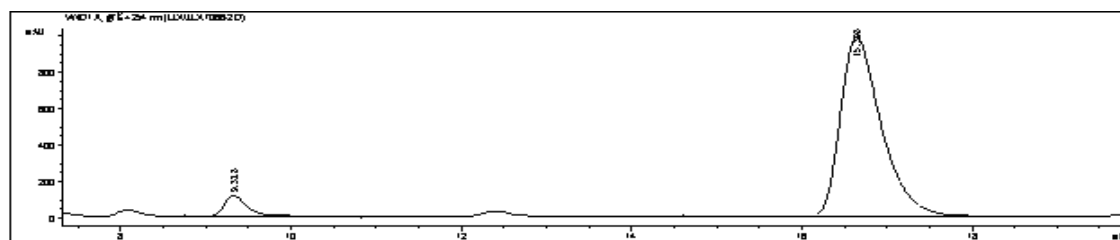

**4n**, white solid, M.p. 39.6 - 40.2 °C; 77% yield; 99% *ee*;  $[\alpha]_{20}^D = +80.5$  (*c* 0.60, CHCl<sub>3</sub>); <sup>1</sup>H NMR (400 MHz, CDCl<sub>3</sub>) δ 7.40 - 7.29 (m, 5H), 7.19 - 7.09 (m, 3H), 7.01 (td, *J* = 7.8, 1.1 Hz, 1H), 6.92 (t, *J* = 7.9 Hz, 1H), 6.83 (d, *J* = 6.9 Hz, 1H), 6.66 (t, *J* = 7.6 Hz, 2H), 6.60 (d, *J* = 6.6 Hz, 2H), 6.45 (d, *J* = 7.6 Hz, 1H), 6.36 (d, *J* = 7.8 Hz, 1H), 6.22 (d, *J* = 1.8 Hz, 1H), 4.84 (d, *J* = 15.9 Hz, 1H), 4.67 (dd, *J* = 43.1, 13.9 Hz, 2H), 4.43 (d, *J* = 15.9 Hz, 1H), 4.05 (d, *J* = 13.2 Hz, 1H), 3.55 (dd, *J* = 9.1, 5.0 Hz, 1H), 3.43 (s, 3H), 3.37 (d, *J* = 13.2 Hz, 1H), 2.74 (dd, *J* = 18.3, 9.1 Hz, 1H), 1.77 (dd, *J* = 18.3, 5.0 Hz, 1H); <sup>13</sup>C NMR (100 MHz, CDCl<sub>3</sub>) δ 176.9, 176.4, 174.9, 158.9, 143.4, 136.7, 135.4, 134.7, 129.1, 128.8, 128.6, 128.0, 127.4, 126.5, 126.3, 124.2, 122.9, 122.6, 114.6, 113.3, 109.6, 55.6, 54.9, 44.7, 43.6, 42.6, 41.3, 31.3; LRMS (ESI) *m/z* 553.3 (M+Na<sup>+</sup>); HRMS (ESI) *m/z* 553.2096 (M+Na<sup>+</sup>), Calc. for C<sub>34</sub>H<sub>30</sub>N<sub>2</sub>NaO<sub>4</sub> 553.2098.

The *ee* was determined by HPLC analysis. CHIRALCEL IA (4.6 mm i.d. x 250 mm); Hexane/2-propanol = 70/30; flow rate 1.0 ml/min; 25 °C; 254 nm; retention time: 11.4 min (minor) and 14.4 min (major).

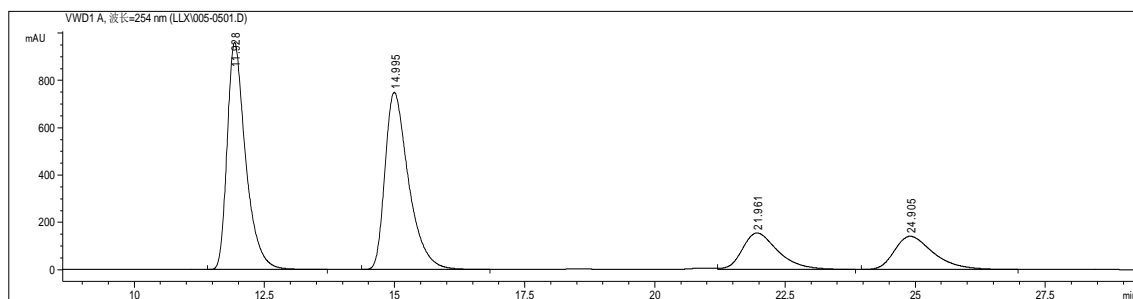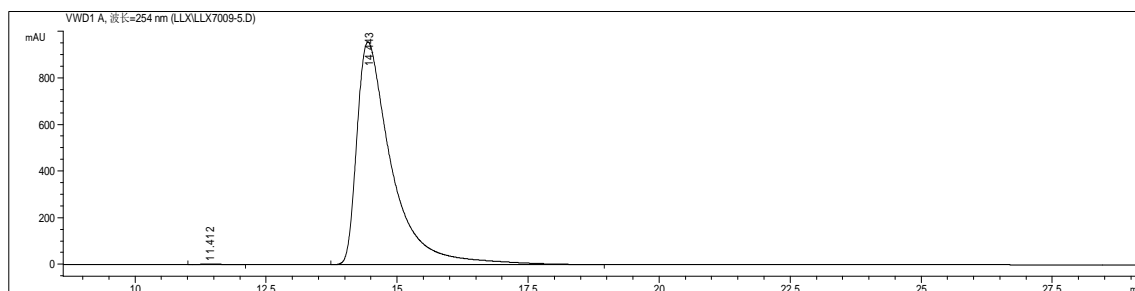

**4o**, white solid, M.p. 75.5 - 77.8 °C; 88% yield; 97% *ee*;  $[\alpha]_{20}^D = +129.5$  (*c* 1.06, CHCl<sub>3</sub>); <sup>1</sup>H NMR (400 MHz, CDCl<sub>3</sub>) δ 7.41 - 7.31 (m, 5H), 7.21 - 7.15 (m, 3H), 7.10 - 6.93 (m, 3H), 6.83 - 6.80 (m, 3H), 6.68 - 6.53 (m, 3H), 6.38 (d, *J* = 7.8 Hz, 1H), 4.82 (d, *J* = 15.8 Hz, 1H), 4.67 (dd, *J* = 34.2, 13.9 Hz, 2H), 4.56 (d, *J* = 15.8 Hz, 1H), 4.24 (d, *J* = 13.3 Hz, 1H), 3.56 (dd, *J* = 9.1, 5.0 Hz, 1H), 3.42 (s, 3H), 3.35 (d, *J* = 13.3 Hz, 1H), 2.70 (dd, *J* = 18.3, 9.1 Hz, 1H), 1.80 (dd, *J* = 18.3, 5.0 Hz, 1H); <sup>13</sup>C NMR (100 MHz, CDCl<sub>3</sub>) δ 176.9 (two peaks), 175.1, 157.5, 143.2, 135.5, 135.2, 131.6, 129.1, 128.6 (two peaks), 128.0, 127.4, 126.9, 126.6, 125.1, 124.0, 122.2, 119.9, 110.1, 108.8, 55.1, 54.5, 44.4, 43.7, 42.5, 33.9, 31.4; LRMS (ESI) *m/z* 531.2 (M+H<sup>+</sup>); HRMS (ESI) *m/z* 531.2286 (M+H<sup>+</sup>), Calc. for C<sub>34</sub>H<sub>31</sub>N<sub>2</sub>O<sub>4</sub> 531.2286.

The *ee* was determined by HPLC analysis. CHIRALCEL IA (4.6 mm i.d. x 250 mm); Hexane/2-propanol = 70/30; flow rate 1.0 ml/min; 25 °C; 254 nm; retention time: 10.9 min (minor) and 13.1 min (major).

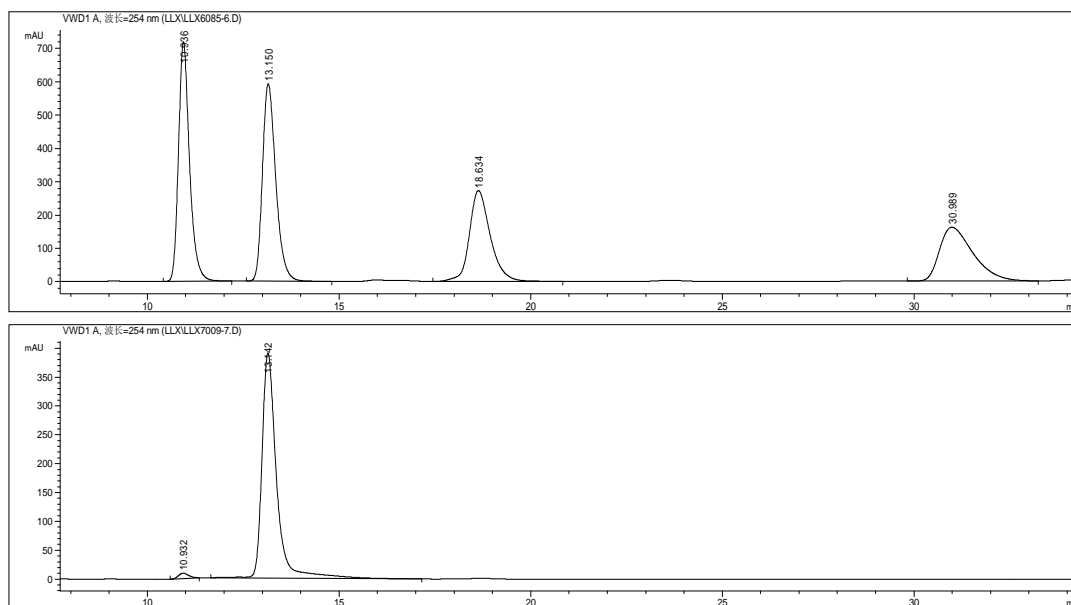

**4p**, white solid, M.p. 51.2 - 51.7 °C; 90% yield; 99% *ee*;  $[\alpha]_{20}^D = +190.0$  (*c* 0.19, CHCl<sub>3</sub>); <sup>1</sup>H NMR (400 MHz, CDCl<sub>3</sub>) δ 8.18 (d, *J* = 8.5 Hz, 1H), 7.73 - 7.66 (m, 1H), 7.58 (d, *J* = 8.1 Hz, 1H), 7.46 - 7.32 (m, 7H), 7.13 (t, *J* = 7.3 Hz, 1H), 7.10 - 6.98 (m, 3H), 6.94 (d, *J* = 6.3 Hz, 1H), 6.91 - 6.83 (m, 2H), 6.57 - 6.46 (m, 3H), 6.26 (d, *J* = 7.8 Hz, 1H), 4.83 - 4.61 (m, 4H), 4.35 (d, *J* = 15.7 Hz, 1H), 3.97 (d, *J* = 14.0 Hz, 1H), 3.72 (dd, *J* = 9.1, 5.2 Hz, 1H), 2.77 (dd, *J* = 18.3, 9.1 Hz, 1H), 1.75 (dd, *J* = 18.3, 5.2 Hz, 1H); <sup>13</sup>C NMR (100 MHz, CDCl<sub>3</sub>) δ 177.3, 176.9, 174.9, 143.3, 135.4, 134.7, 133.5, 132.1, 131.9, 129.1, 128.9, 128.7, 128.5, 128.2,

128.1, 127.4, 127.3, 126.7, 126.0, 125.3 (two peaks), 124.8, 124.7, 124.6, 122.6, 109.2, 55.6, 44.8, 43.7, 42.6, 36.1, 31.4; LRMS (ESI)  $m/z$  573.2 ( $M+Na^+$ ); HRMS (ESI)  $m/z$  573.2138 ( $M+Na^+$ ), Calc. for  $C_{37}H_{30}N_2NaO_3$  573.2149.

The *ee* was determined by HPLC analysis. CHIRALCEL IA (4.6 mm i.d. x 250 mm); Hexane/2-propanol = 70/30; flow rate 1.0 ml/min; 25 °C; 254 nm; retention time: 11.9 min (minor) and 17.0 min (major).

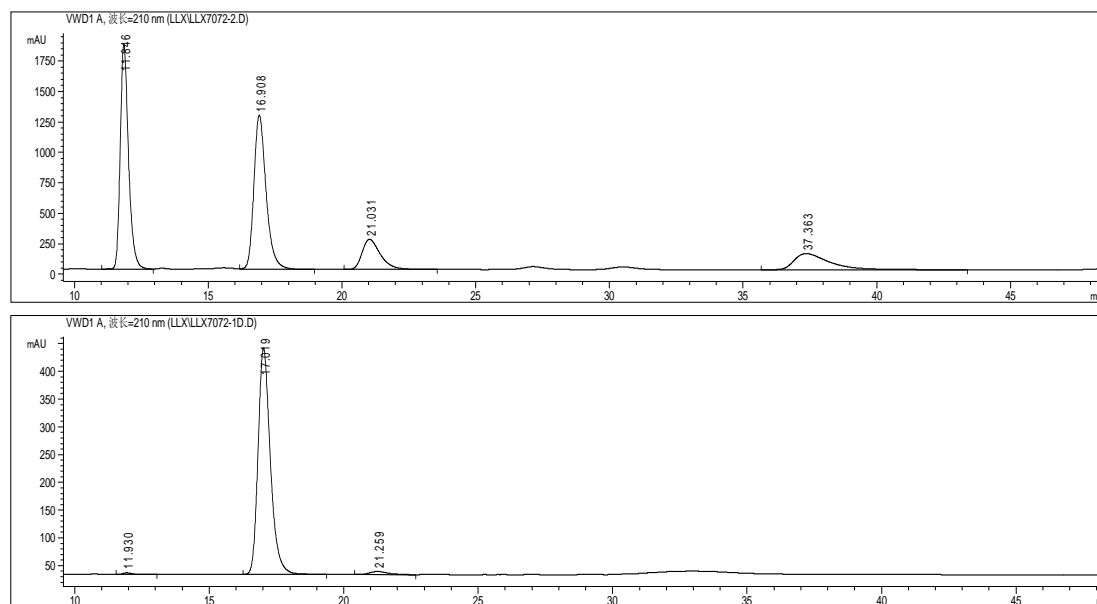

**4q**, white solid, M.p. 35.6 - 36.7 °C; 81% yield; 96% *ee*;  $[\alpha]_{20}^D = +251.6$  ( $c$  0.06,  $CHCl_3$ );  $^1H$  NMR (400 MHz,  $CDCl_3$ )  $\delta$  7.39 - 7.30 (m, 5H), 7.20 - 7.13 (m, 3H), 7.07 (td,  $J = 7.8, 1.2$  Hz, 1H), 6.93 (dd,  $J = 5.1, 0.9$  Hz, 1H), 6.80 (d,  $J = 6.8$  Hz, 1H), 6.75 - 6.65 (m, 4H), 6.57 (d,  $J = 3.2$  Hz, 1H), 6.46 (d,  $J = 7.8$  Hz, 1H), 4.88 (d,  $J = 15.8$  Hz, 1H), 4.66 (dd,  $J = 41.3, 13.9$  Hz, 2H), 4.51 (d,  $J = 15.8$  Hz, 1H), 4.27 (d,  $J = 14.4$  Hz, 1H), 3.66 (d,  $J = 14.4$  Hz, 1H), 3.52 (dd,  $J = 9.1, 5.1$  Hz, 1H), 2.73 (dd,  $J = 18.3, 9.1$  Hz, 1H), 1.78 (dd,  $J = 18.3, 5.1$  Hz, 1H);  $^{13}C$  NMR (100 MHz,  $CDCl_3$ )  $\delta$  176.8, 176.3, 174.8, 143.8, 136.8, 135.4, 134.8, 129.4, 129.1, 128.7 (two peaks), 128.1, 127.4, 126.7, 126.2, 124.5, 124.2, 123.2, 109.6, 55.3, 44.4, 43.8, 42.6, 35.4, 31.3; LRMS (ESI)  $m/z$  529.1 ( $M+Na^+$ ); HRMS (ESI)  $m/z$  529.1563 ( $M+Na^+$ ), Calc. for  $C_{31}H_{26}N_2NaO_3S$  529.1556.

The *ee* was determined by HPLC analysis. CHIRALCEL IA (4.6 mm i.d. x 250 mm); Hexane/2-propanol = 70/30; flow rate 1.0 ml/min; 25 °C; 254 nm; retention time: 10.1 min (minor) and 13.8 min (major).



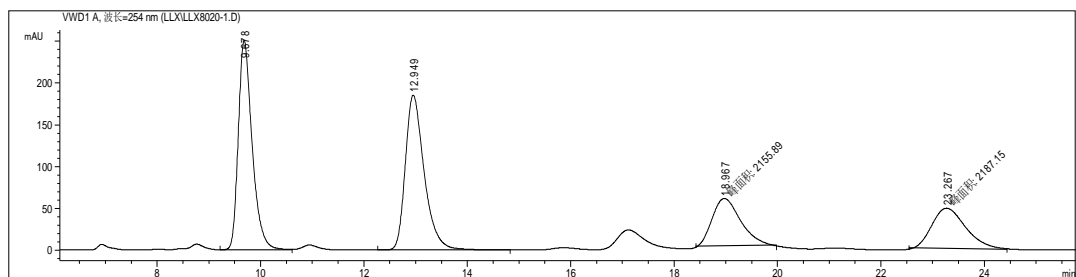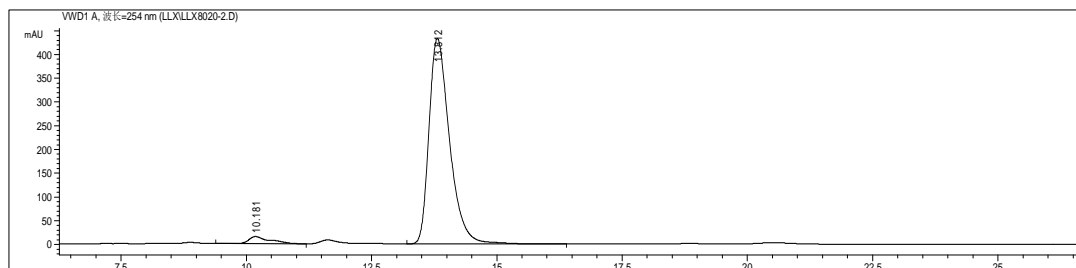

**4r**, white solid, M.p. 70.6 - 71.4 °C; 89% yield; 94% *ee*;  $[\alpha]_{20}^D = +130.9$  ( $c$  0.47,  $\text{CHCl}_3$ );  $^1\text{H}$  NMR (400 MHz,  $\text{CDCl}_3$ )  $\delta$  7.35 (d,  $J = 4.4$  Hz, 4H), 7.32 - 7.28 (m, 1H), 7.20 - 7.11 (m, 5H), 7.07 - 7.02 (m, 3H), 6.84 (d,  $J = 7.2$  Hz, 2H), 6.61 (d,  $J = 6.9$  Hz, 2H), 6.28 (t,  $J = 9.5$  Hz, 1H), 4.74 (d,  $J = 15.8$  Hz, 1H), 4.69 (d,  $J = 4.3$  Hz, 2H), 4.46 (d,  $J = 15.9$  Hz, 1H), 4.08 (d,  $J = 13.2$  Hz, 1H), 3.59 (dd,  $J = 9.1, 5.9$  Hz, 1H), 3.41 (d,  $J = 13.3$  Hz, 1H), 2.76 (dd,  $J = 18.1, 9.1$  Hz, 1H), 1.89 (dd,  $J = 18.1, 5.9$  Hz, 1H);  $^{13}\text{C}$  NMR (100 MHz,  $\text{CDCl}_3$ )  $\delta$  176.6, 176.1, 174.5, 142.0, 135.2, 134.8, 134.3, 130.1, 129.2, 128.9, 128.8, 128.6, 128.5 (two peaks), 128.1, 128.0, 127.6, 126.8, 126.6, 124.7, 110.5, 55.5, 44.9, 43.8, 42.7, 41.5, 31.3; LRMS (ESI)  $m/z$  557.1 ( $\text{M}+\text{Na}^+$ ); HRMS (ESI)  $m/z$  557.1611 ( $\text{M}+\text{Na}^+$ ), Calc. for  $\text{C}_{33}\text{H}_{27}\text{ClN}_2\text{NaO}_3$  557.1602.

The *ee* was determined by HPLC analysis. CHIRALCEL IA (4.6 mm i.d. x 250 mm); Hexane/2-propanol = 70/30; flow rate 1.0 ml/min; 25 °C; 254 nm; retention time: 9.5 min (minor) and 13.1 min (major).

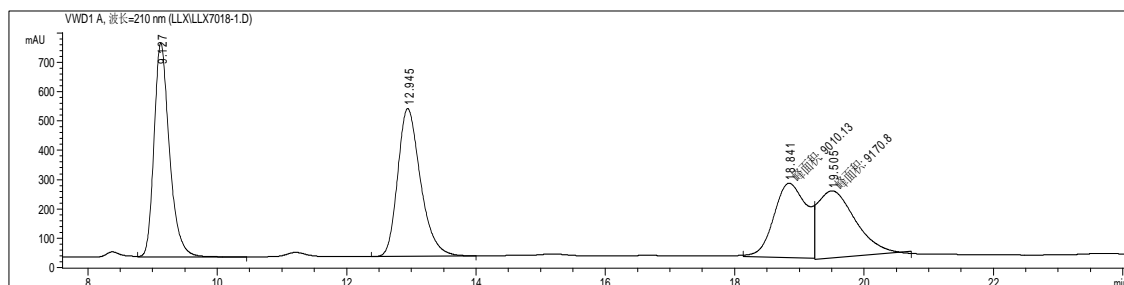

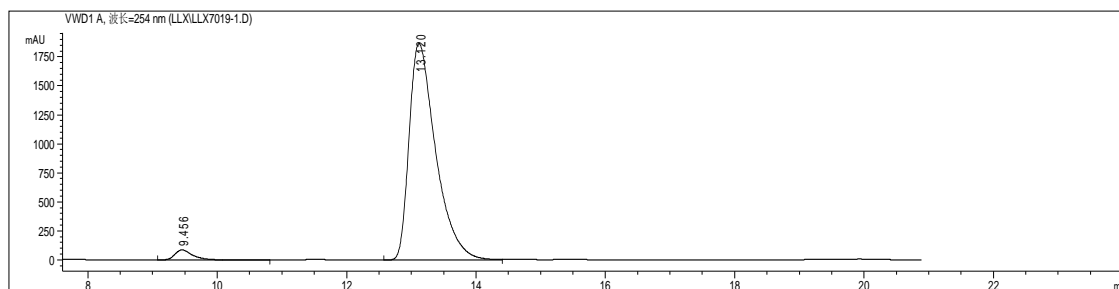

**4s**, white powder, M.p. 54.1 - 56.2 °C; 92% yield; 99% *ee*;  $[\alpha]_{20}^D = +180.4$  (*c* 0.49, CHCl<sub>3</sub>); <sup>1</sup>H NMR (400 MHz, CDCl<sub>3</sub>) δ 7.41 - 7.30 (m, 5H), 7.18 - 7.08 (m, 4H), 7.02 (t, *J* = 7.5 Hz, 2H), 6.87 (s, 1H), 6.83 (t, *J* = 6.9 Hz, 3H), 6.59 (d, *J* = 6.7 Hz, 2H), 6.25 (d, *J* = 7.9 Hz, 1H), 4.77 (d, *J* = 15.9 Hz, 1H), 4.68 (s, 2H), 4.44 (d, *J* = 15.9 Hz, 1H), 4.10 (d, *J* = 13.2 Hz, 1H), 3.58 (dd, *J* = 9.1, 5.6 Hz, 1H), 3.40 (d, *J* = 13.2 Hz, 1H), 2.72 (dd, *J* = 18.2, 9.1 Hz, 1H), 2.06 (s, 3H), 1.80 (dd, *J* = 18.2, 5.6 Hz, 1H); <sup>13</sup>C NMR (100 MHz, CDCl<sub>3</sub>) δ 177.0, 176.3, 174.9, 141.0, 135.4 (two peaks), 134.8, 132.6, 130.1, 129.5, 128.8, 128.7, 128.5, 128.0, 127.8, 127.2, 126.6, 126.5 (two peaks), 124.7, 109.2, 55.5, 44.8, 43.6, 42.5, 41.3, 31.3, 21.0; LRMS (ESI) *m/z* 537.2 (M+Na<sup>+</sup>); HRMS (ESI) *m/z* 537.2153 (M+Na<sup>+</sup>), Calc. for C<sub>34</sub>H<sub>30</sub>N<sub>2</sub>NaO<sub>3</sub> 537.2149. The *ee* was determined by HPLC analysis. CHIRALCEL IA (4.6 mm i.d. x 250 mm); Hexane/2-propanol = 70/30; flow rate 1.0 ml/min; 25 °C; 254 nm; retention time: 12.2 min (major).

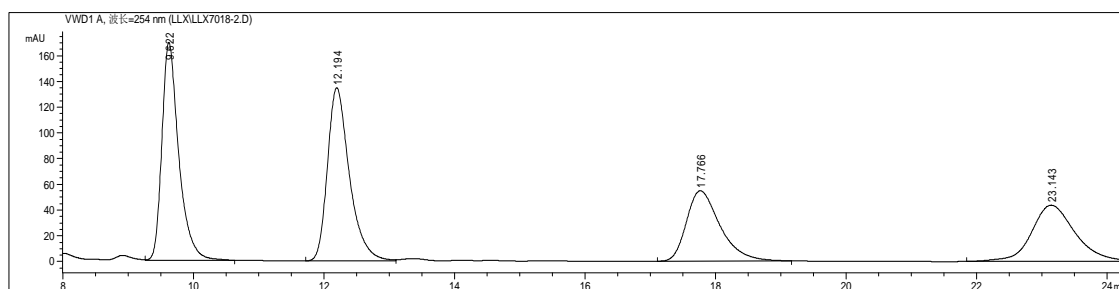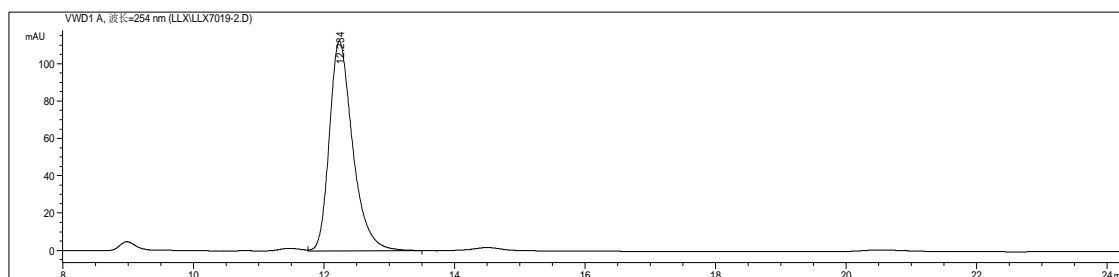

**4t**, white powder, M.p. 84.2 - 85.6 °C; 91% yield; 97% *ee*;  $[\alpha]_{20}^D = +229.2$  (*c* 0.14, CHCl<sub>3</sub>); <sup>1</sup>H NMR (400 MHz, CDCl<sub>3</sub>) δ 7.37 (s, 5H), 7.17 - 7.10 (m, 4H), 7.02 (t, *J* = 7.5 Hz, 2H), 6.79

- 6.72 (m, 3H), 6.64 - 6.59 (m, 3H), 6.49 (d,  $J = 1.6$  Hz, 1H), 4.75 (d,  $J = 4.0$  Hz, 1H), 4.71 (s, 1H), 4.60 (d,  $J = 13.9$  Hz, 1H), 4.41 (d,  $J = 15.9$  Hz, 1H), 4.01 (d,  $J = 13.3$  Hz, 1H), 3.54 (dd,  $J = 9.1, 5.1$  Hz, 1H), 3.37 (d,  $J = 13.3$  Hz, 1H), 2.74 (dd,  $J = 18.3, 9.1$  Hz, 1H), 1.77 (dd,  $J = 18.3, 5.1$  Hz, 1H);  $^{13}\text{C}$  NMR (100 MHz,  $\text{CDCl}_3$ )  $\delta$  176.6, 176.4, 174.6, 144.7, 135.4, 134.9, 134.2, 130.1, 129.1, 128.8, 128.7, 128.0, 128.2, 127.6, 126.8, 126.6, 125.9, 125.4, 125.3, 125.0, 122.7, 112.8, 55.4, 44.5, 43.8, 42.6, 41.2, 31.3; LRMS (ESI)  $m/z$  601.1 ( $\text{M}+\text{Na}^+$ ); HRMS (ESI)  $m/z$  601.1101 ( $\text{M}+\text{Na}^+$ ), Calc. for  $\text{C}_{33}\text{H}_{27}\text{BrN}_2\text{NaO}_3$  601.1097.

The *ee* was determined by HPLC analysis. CHIRALCEL IA (4.6 mm i.d. x 250 mm); Hexane/2-propanol = 70/30; flow rate 1.0 ml/min; 25 °C; 254 nm; retention time: 8.5 min (minor) and 10.4 min (major).

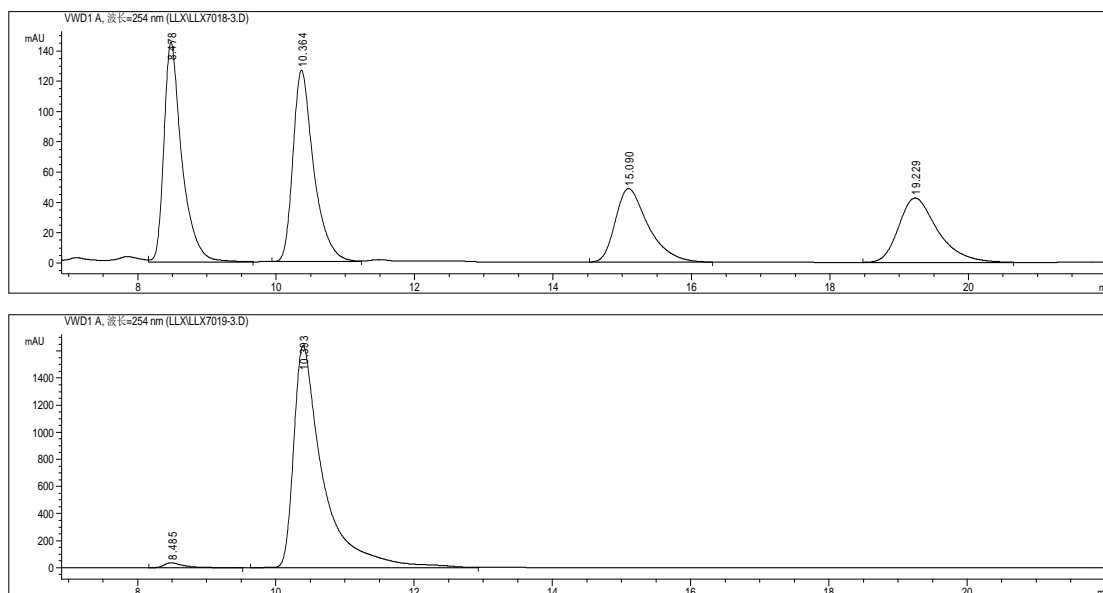

**4u**, white powder, M.p. 72.7 - 73.4 °C; 89% yield; 90% *ee*;  $[\alpha]_{20}^{\text{D}} = +183.4$  ( $c$  0.93,  $\text{CHCl}_3$ );  $^1\text{H}$  NMR (400 MHz,  $\text{CDCl}_3$ )  $\delta$  7.40 - 7.31 (m, 5H), 7.21 - 7.05 (m, 4H), 6.98 (t,  $J = 7.6$  Hz, 2H), 6.84 - 6.73 (m, 5H), 6.64 - 6.55 (m, 2H), 4.80 (d,  $J = 15.5$  Hz, 1H), 4.70 (dd,  $J = 14.7, 8.2$  Hz, 2H), 4.61 (d,  $J = 13.9$  Hz, 1H), 4.01 (d,  $J = 13.3$  Hz, 1H), 3.53 (dd,  $J = 9.1, 5.1$  Hz, 1H), 3.38 (d,  $J = 13.3$  Hz, 1H), 2.71 (dd,  $J = 18.3, 9.1$  Hz, 1H), 1.78 (dd,  $J = 18.3, 5.0$  Hz, 1H);  $^{13}\text{C}$  NMR (100 MHz,  $\text{CDCl}_3$ )  $\delta$  176.6, 176.2, 174.6, 136.2, 135.4, 134.8, 130.0, 129.2, 128.7, 128.5, 128.1, 127.9, 127.3, 126.9, 126.8, 123.7, 123.6, 120.1, 117.4, 117.2, 55.8, 45.2, 44.7, 42.6, 41.3, 31.2; LRMS (ESI)  $m/z$  519.1; HRMS (ESI)  $m/z$  518.1989, Calc. for  $\text{C}_{33}\text{H}_{27}\text{FN}_2\text{O}_3$  518.1994.

The *ee* was determined by HPLC analysis. CHIRALCEL IA (4.6 mm i.d. x 250 mm); Hexane/2-propanol = 70/30; flow rate 1.0 ml/min; 25 °C; 254 nm; retention time: 8.7 min (minor) and 9.8 min (major).

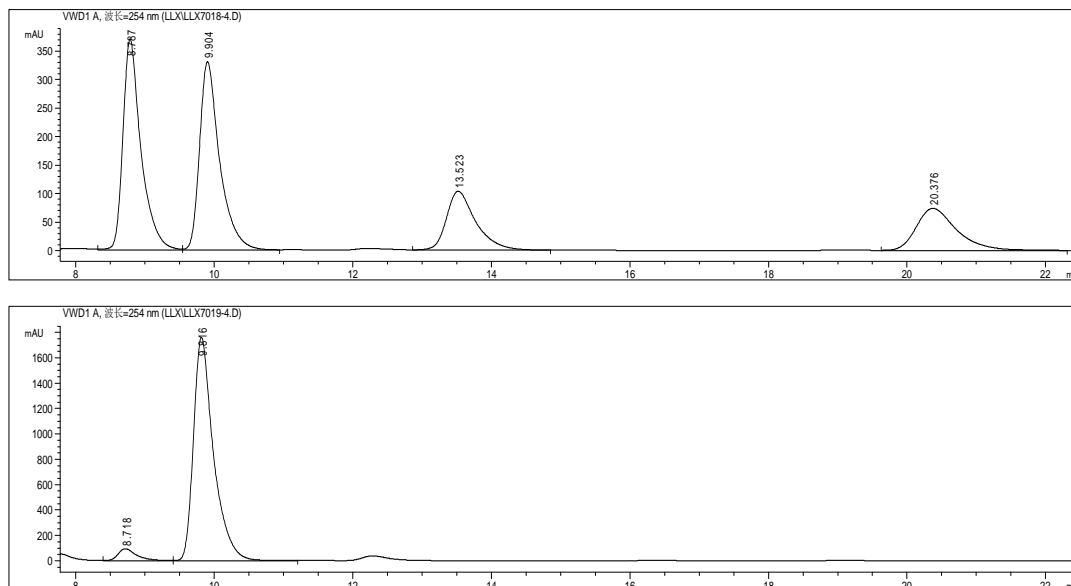

**5a**, white solid, M.p. 135.2 - 136.7 °C, 88% yield; 93% *ee*;  $[\alpha]_{20}^D = +147.4$  (*c* 0.88, CHCl<sub>3</sub>); <sup>1</sup>H NMR (400 MHz, CDCl<sub>3</sub>) δ 7.81 (s, 1H), 7.55 -7.41 (m, 3H), 7.33 (d, *J* = 7.5 Hz, 1H), 7.26 -7.18 (m, 3H), 7.13 - 6.98 (m, 4H), 6.86 (dd, *J* = 8.0, 1.4 Hz, 2H), 6.69 (d, *J* = 7.7 Hz, 1H), 4.03 (d, *J* = 13.3 Hz, 1H), 3.67 (dd, *J* = 9.3, 5.1 Hz, 1H), 3.42 (d, *J* = 13.3 Hz, 1H), 2.92 (dd, *J* = 18.4, 9.3 Hz, 1H), 2.11 (dd, *J* = 18.4, 5.1 Hz, 1H); <sup>13</sup>C NMR (100 MHz, CDCl<sub>3</sub>) δ 178.3, 176.3, 174.3, 141.1, 135.0, 130.0, 129.5, 129.3, 128.9, 127.7, 126.7, 126.6, 124.6, 123.1, 110.2, 56.2, 44.4, 41.1, 31.6; LRMS (EI) *m/z* 396.2; HRMS (EI) *m/z* 396.1575, Calc. for C<sub>25</sub>H<sub>20</sub>N<sub>2</sub>O<sub>3</sub> 396.1567.

The *ee* was determined by HPLC analysis. CHIRALCEL IA (4.6 mm i.d. x 250 mm); Hexane/2-propanol = 70/30; flow rate 1.0 ml/min; 25 °C; 254 nm; retention time: 15.8 min (minor) and 22.6 min (major).

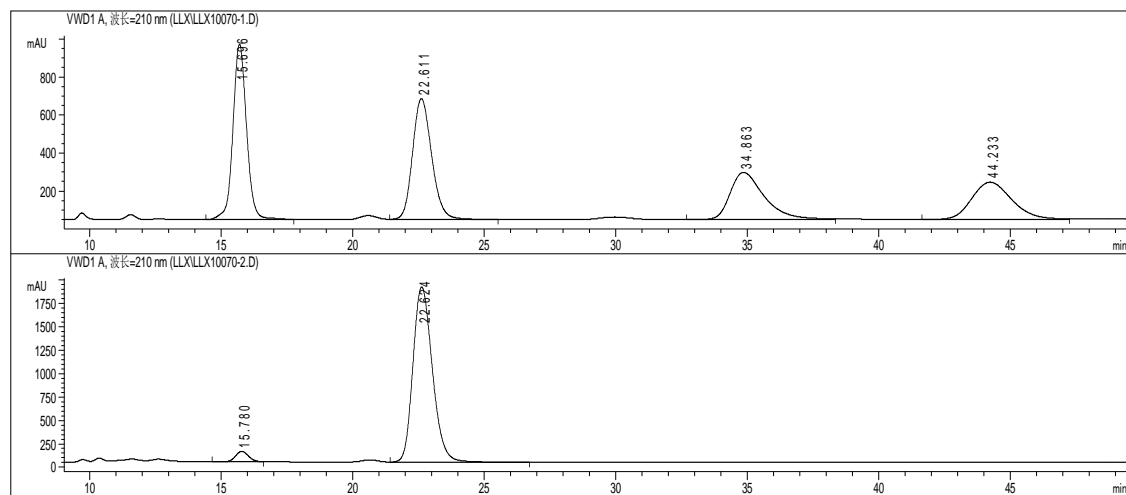

#### 4. X-Ray Crystal Data for Compound 4t

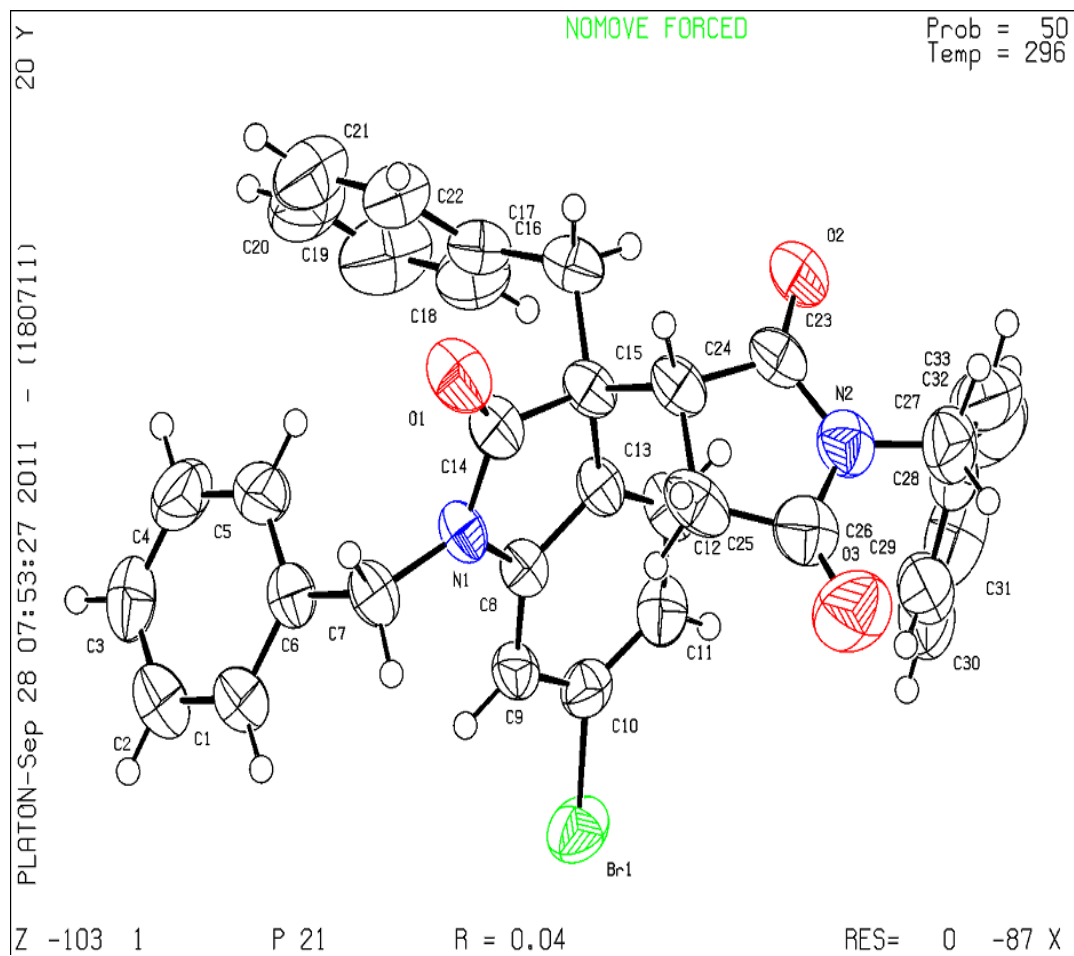

---

## Datablock: 1

---

Bond precision: C-C = 0.0058 Å      Wavelength=0.71073

Cell:            a=11.654 (11)      b=8.990 (8)            c=14.054 (13)  
                  alpha=90            beta=108.273 (17)      gamma=90

Temperature:    296 K

|                        | Calculated       | Reported         |
|------------------------|------------------|------------------|
| Volume                 | 1398 (2)         | 1398 (2)         |
| Space group            | P 21             | P 21             |
| Hall group             | P 2yb            | P 2yb            |
| Moiety formula         | C33 H27 Br N2 O3 | C33 H27 Br N2 O3 |
| Sum formula            | C33 H27 Br N2 O3 | C33 H27 Br N2 O3 |
| Mr                     | 579.47           | 579.48           |
| Dx, g cm <sup>-3</sup> | 1.377            | 1.376            |
| Z                      | 2                | 2                |
| Mu (mm <sup>-1</sup> ) | 1.507            | 1.507            |
| F000                   | 596.0            | 596.0            |
| F000'                  | 595.65           |                  |
| h, k, lmax             | 15, 11, 18       | 15, 11, 18       |
| Nref                   | 3614 [ 6798]     | 5970             |
| Tmin, Tmax             | 0.566, 0.697     |                  |
| Tmin'                  | 0.480            |                  |

Correction method= Not given

Data completeness= 1.65/0.88      Theta(max)= 28.080

R(reflections)= 0.0386( 3721)      wR2(reflections)= 0.0798( 5970)

S = 0.843                              Npar= 352

---

## 5. Copies of NMR Spectra

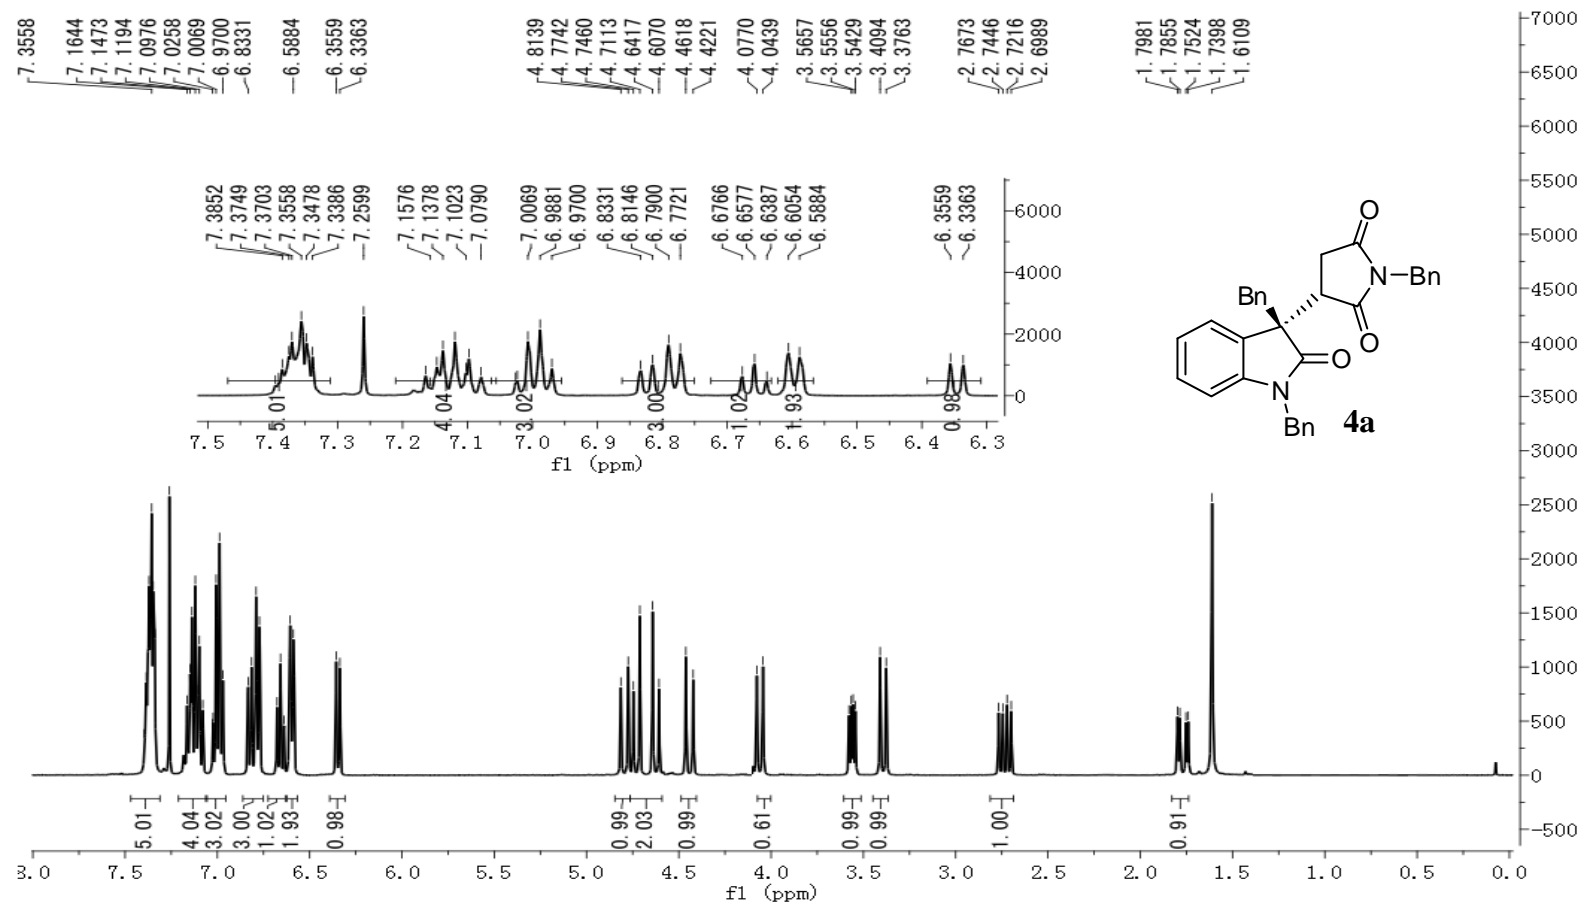



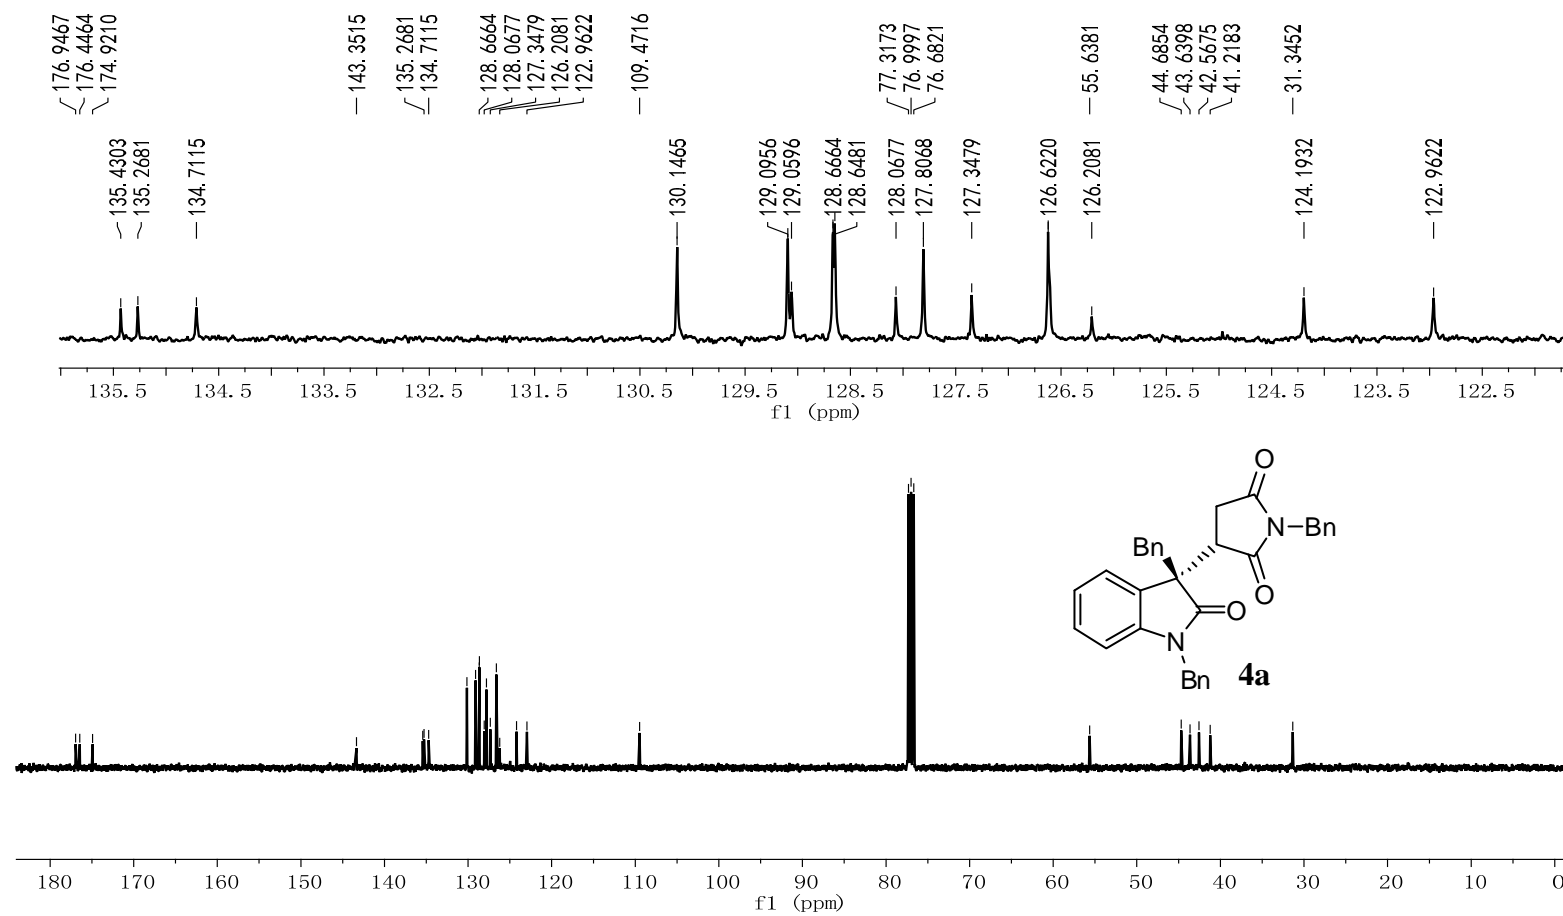

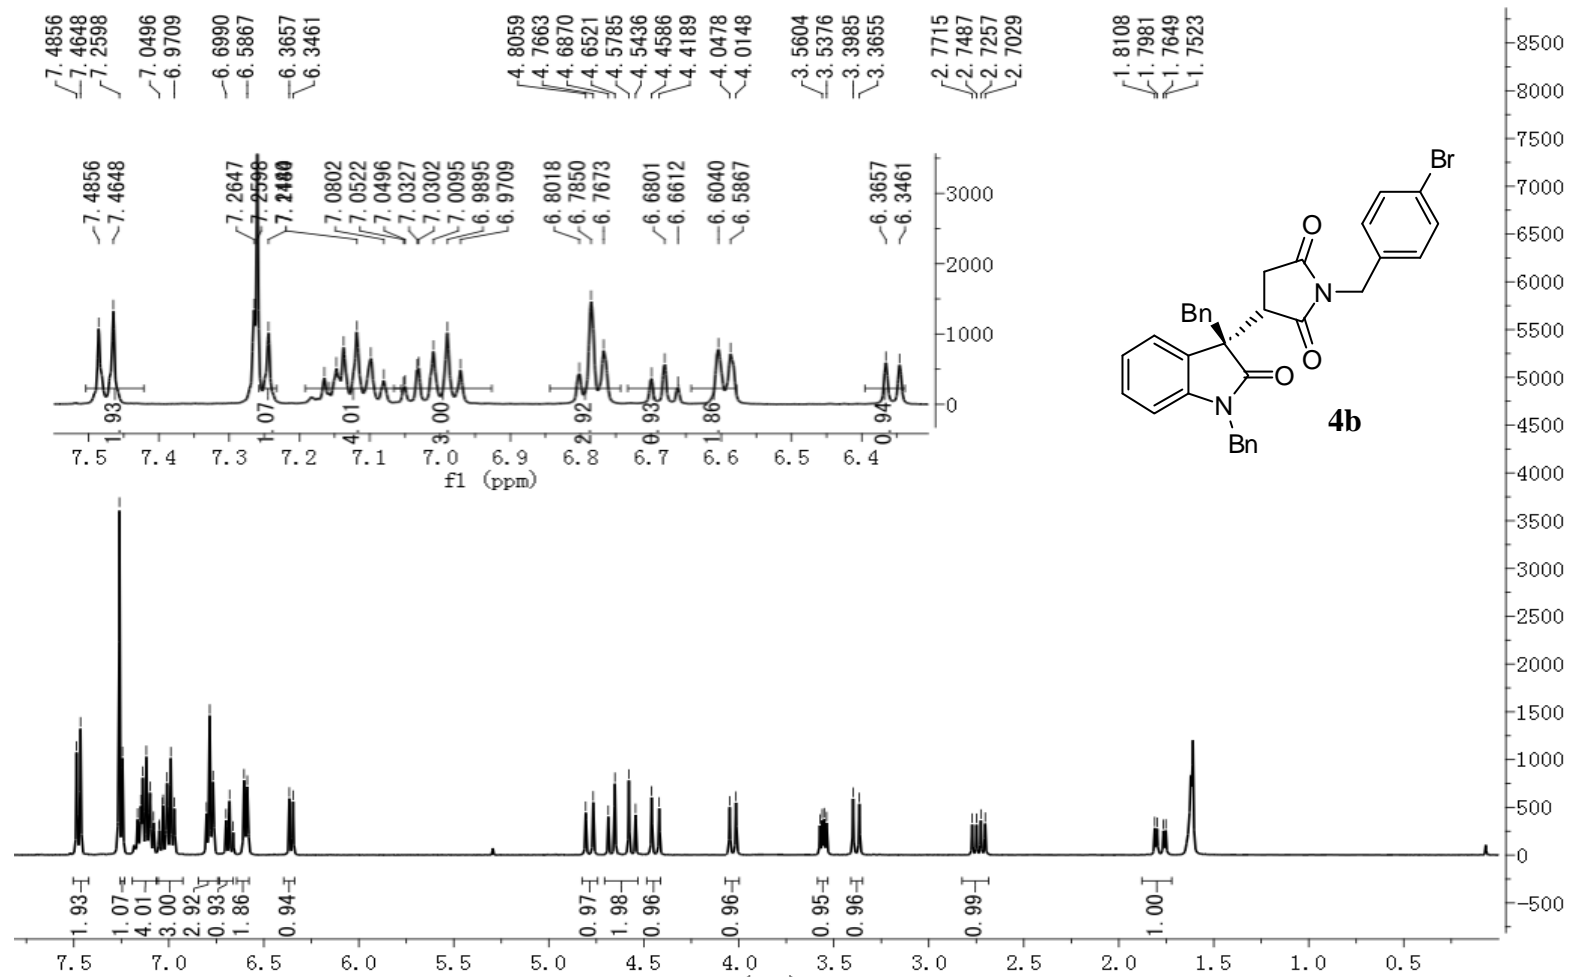

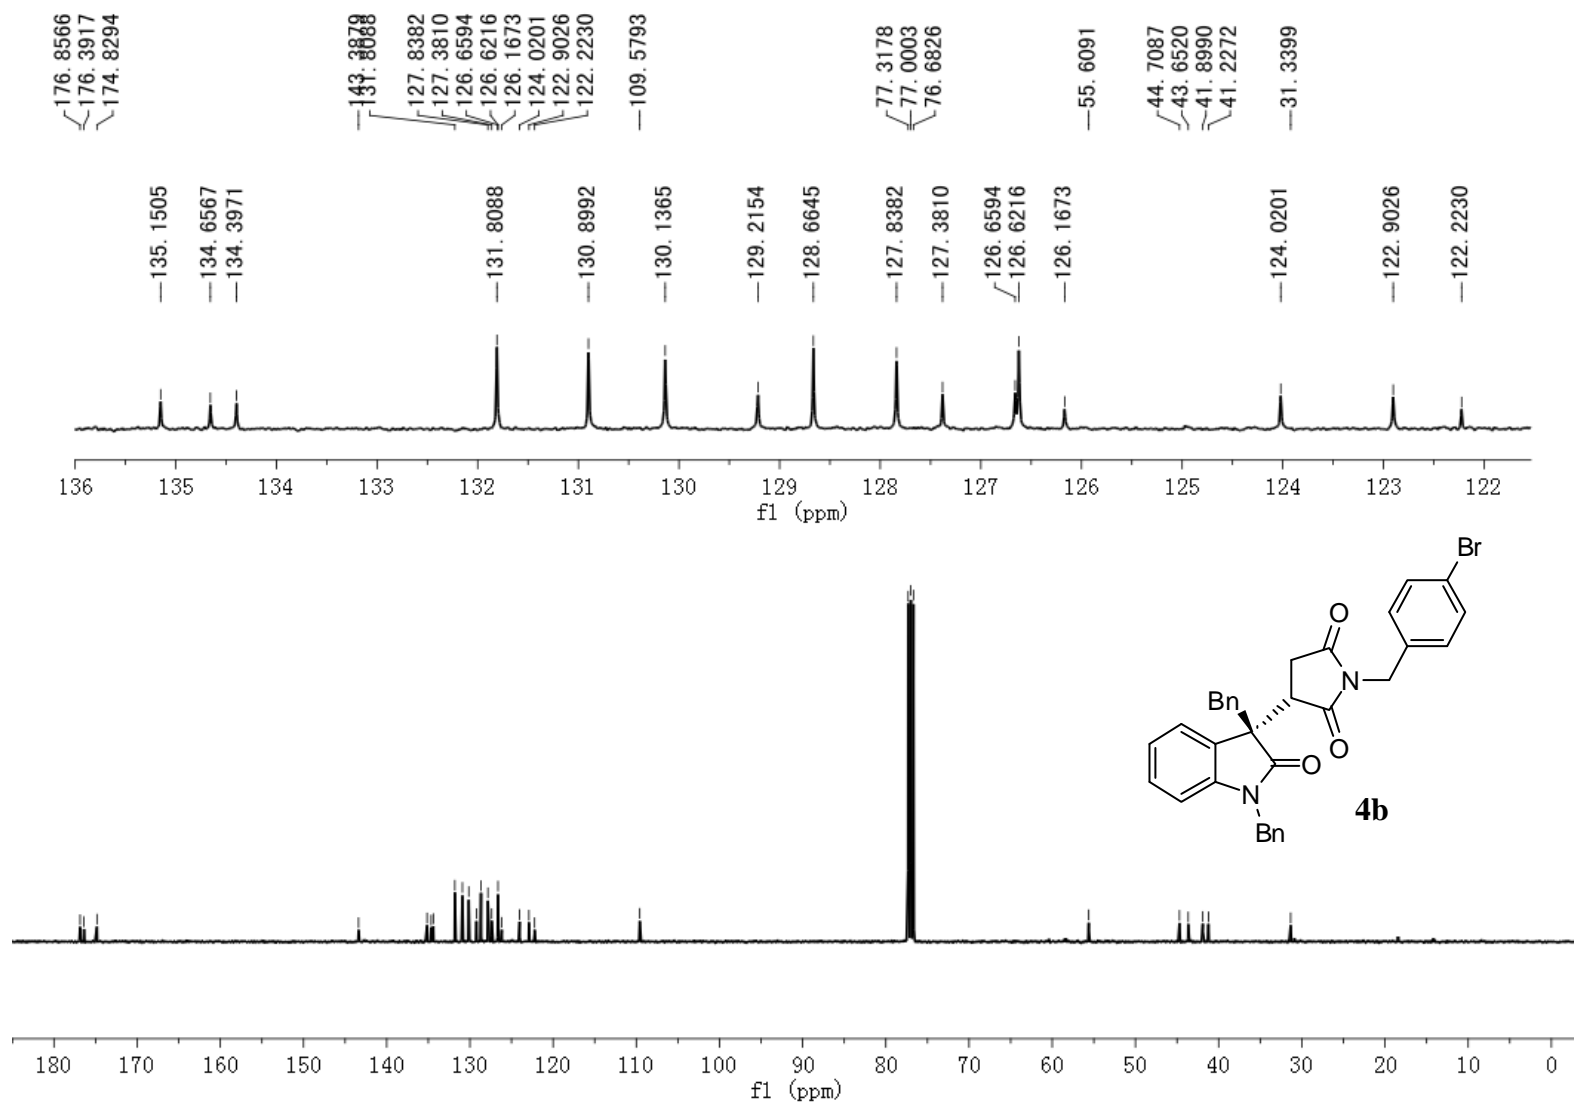

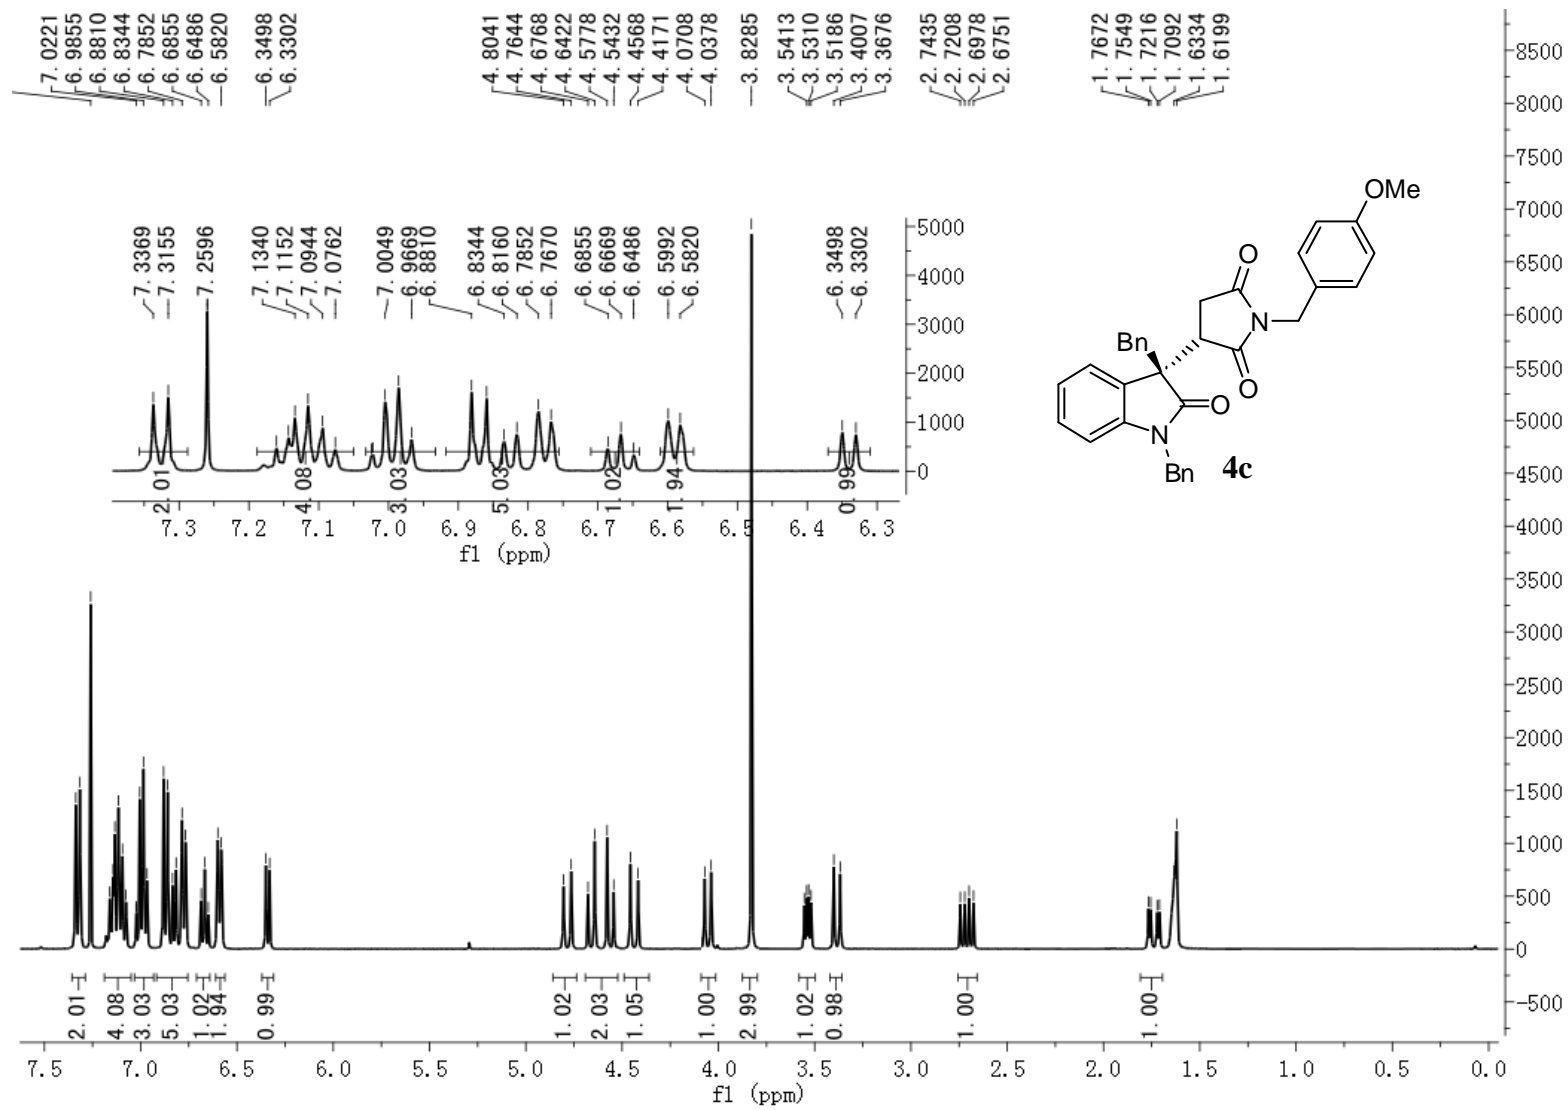

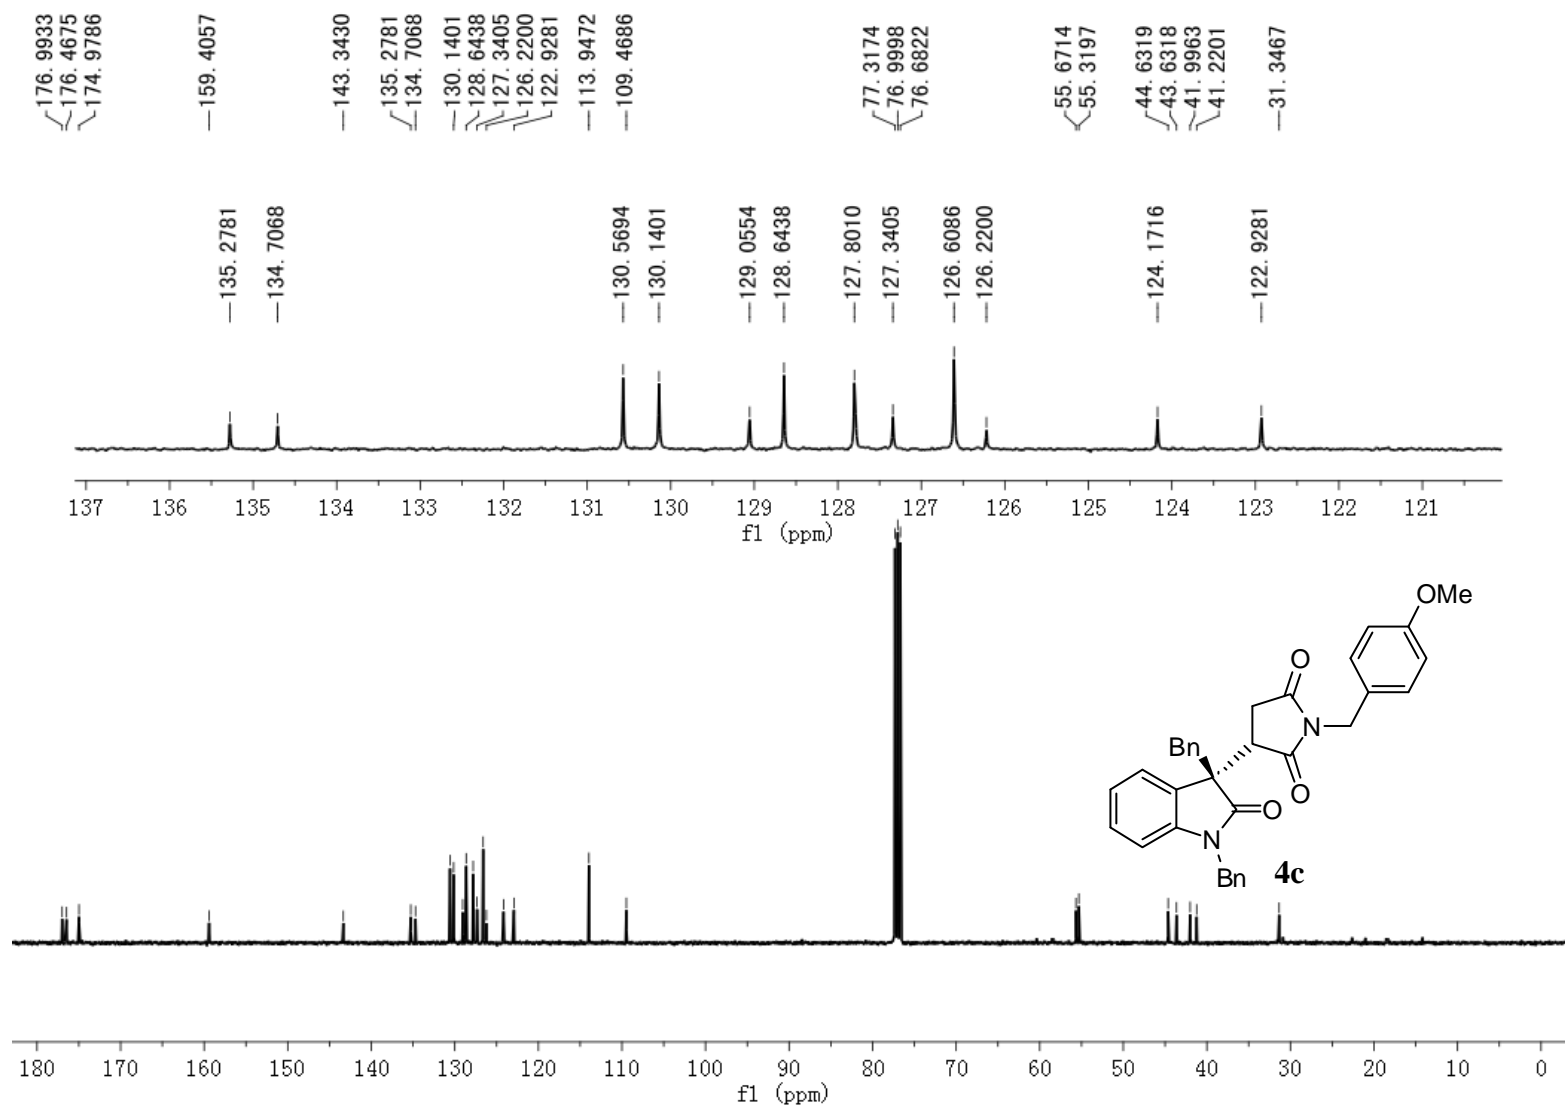

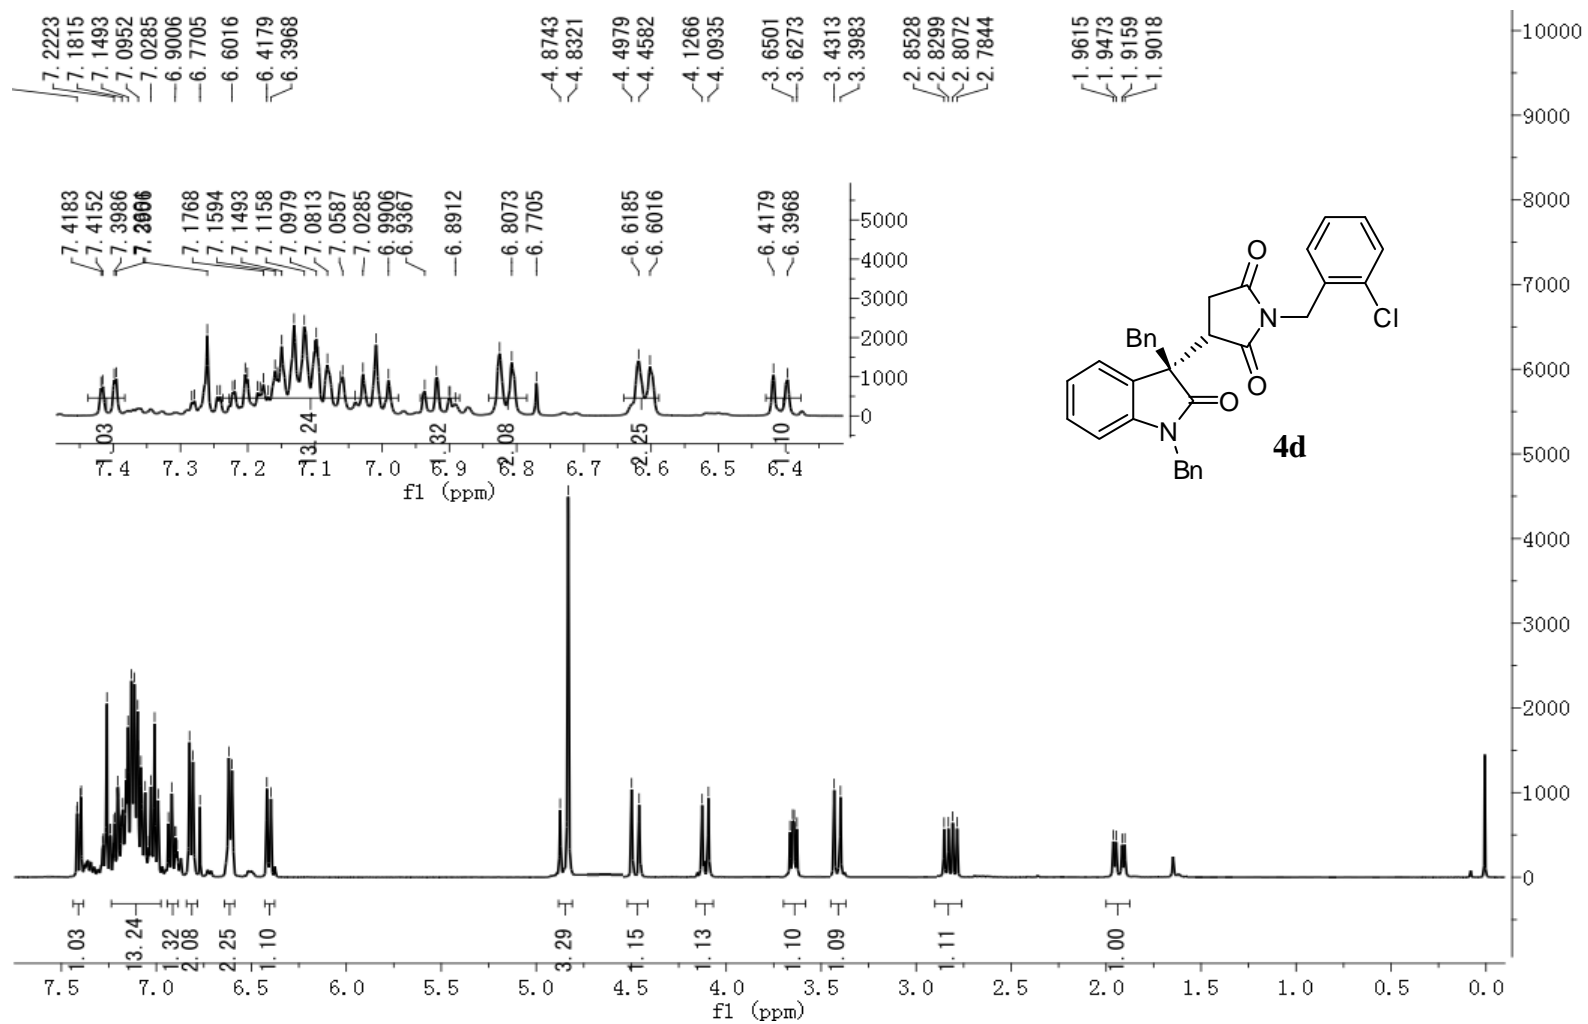

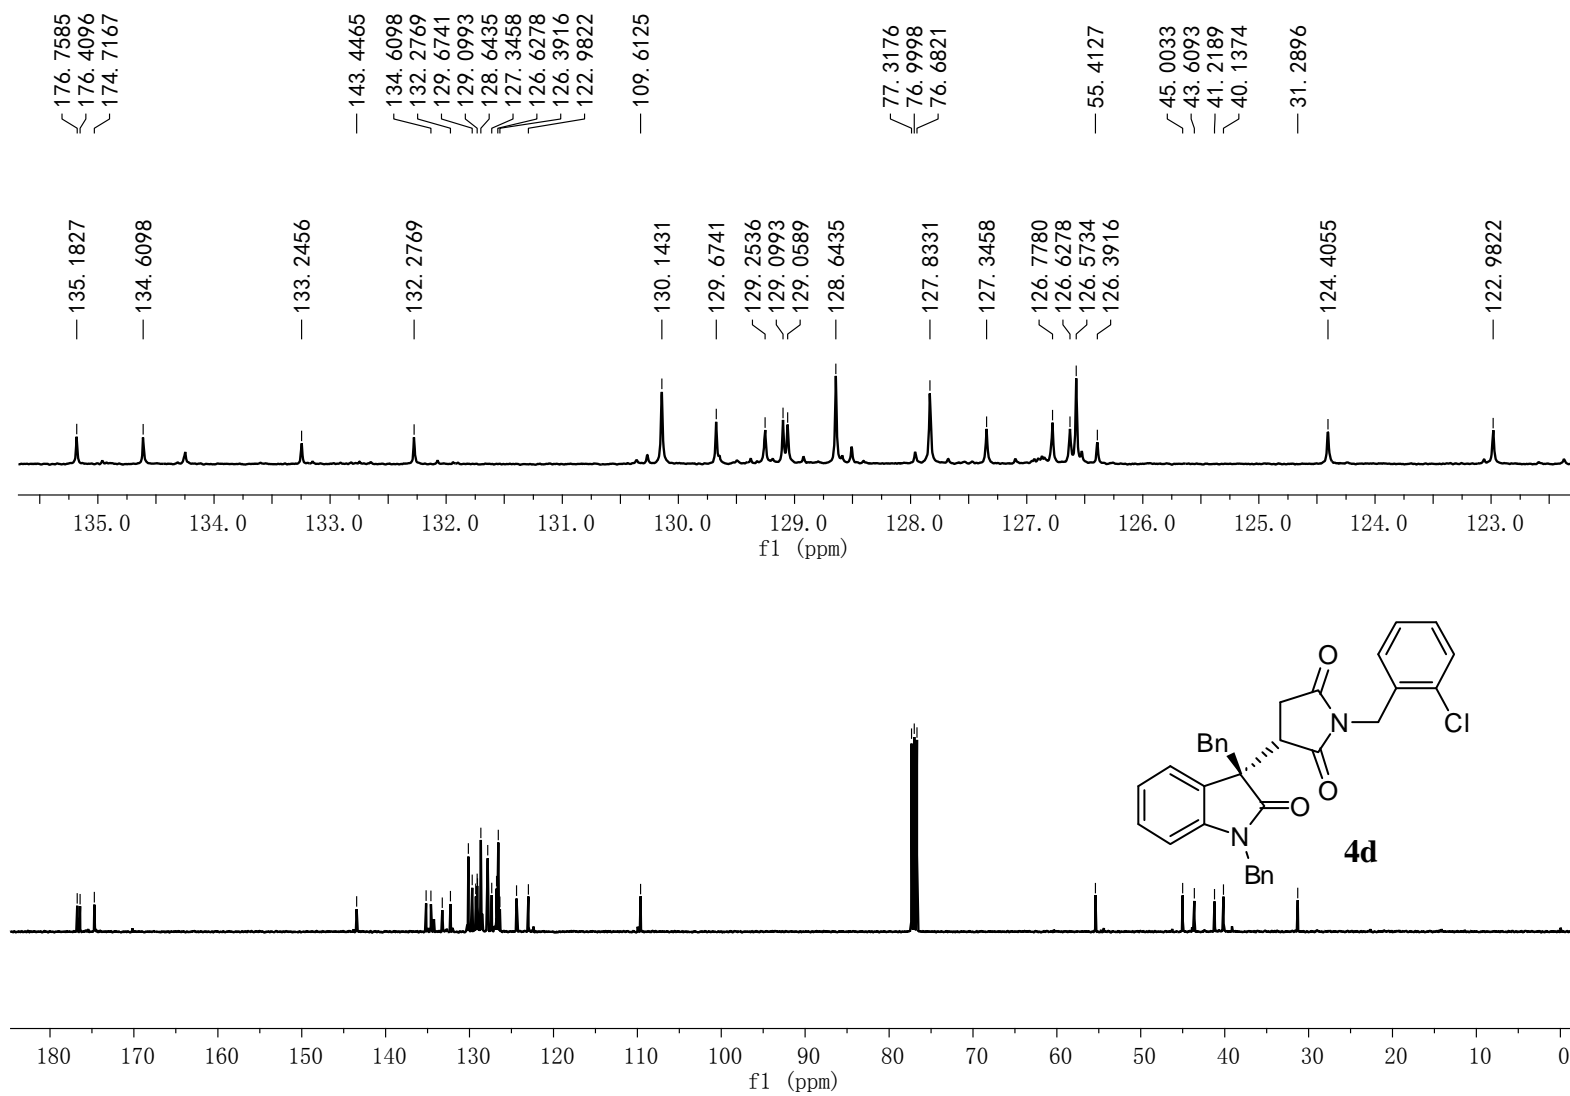

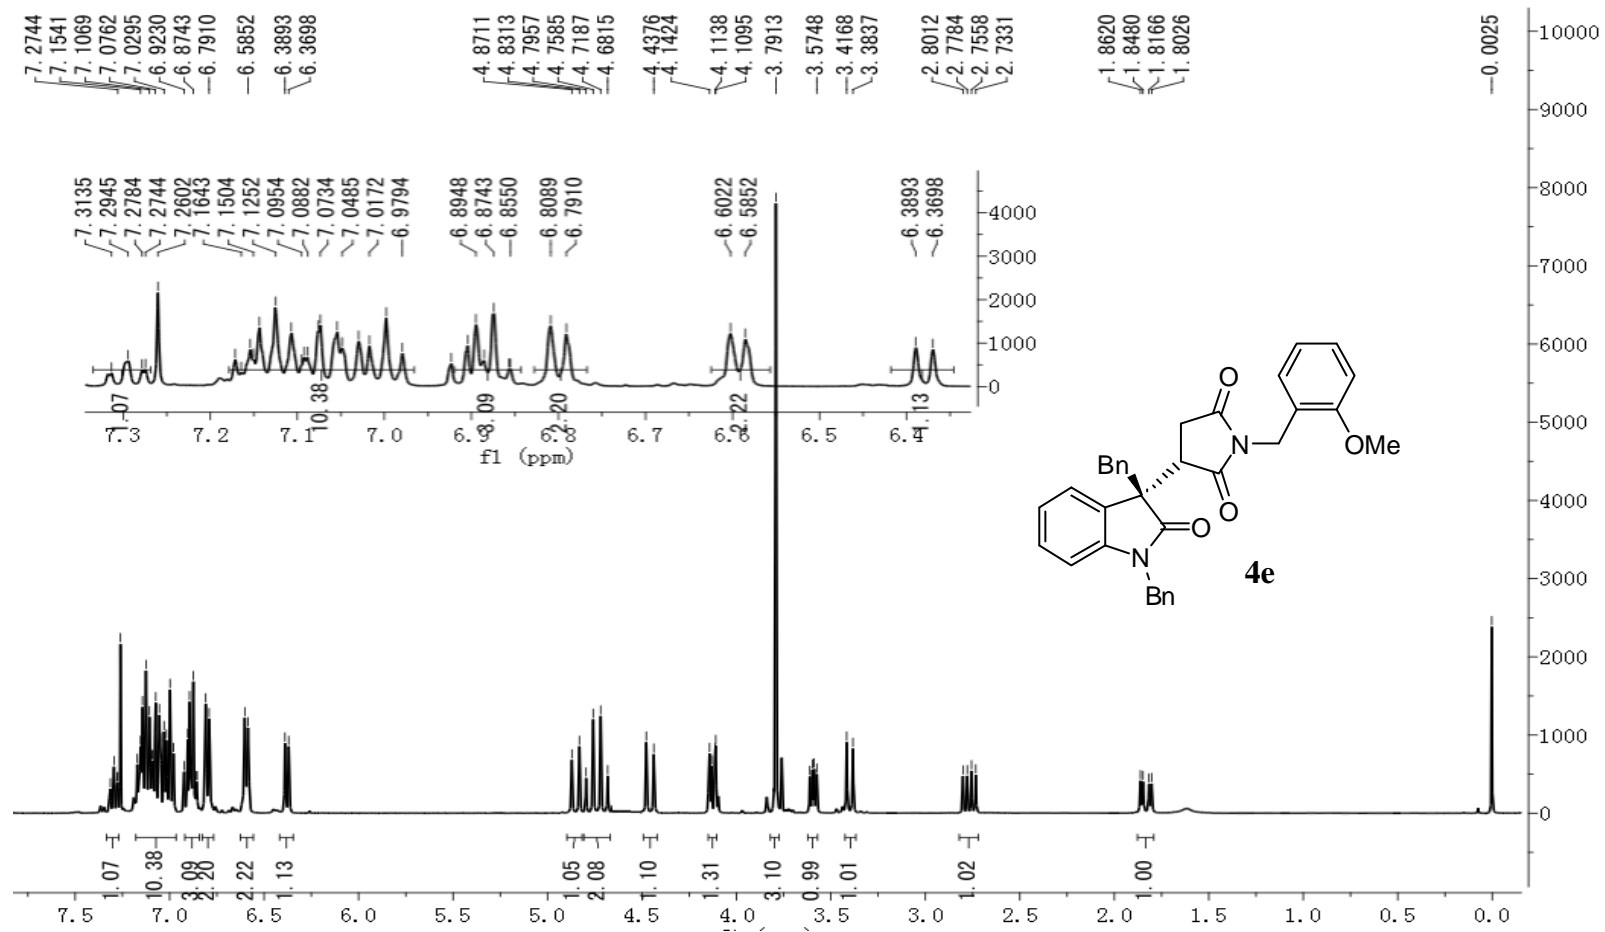



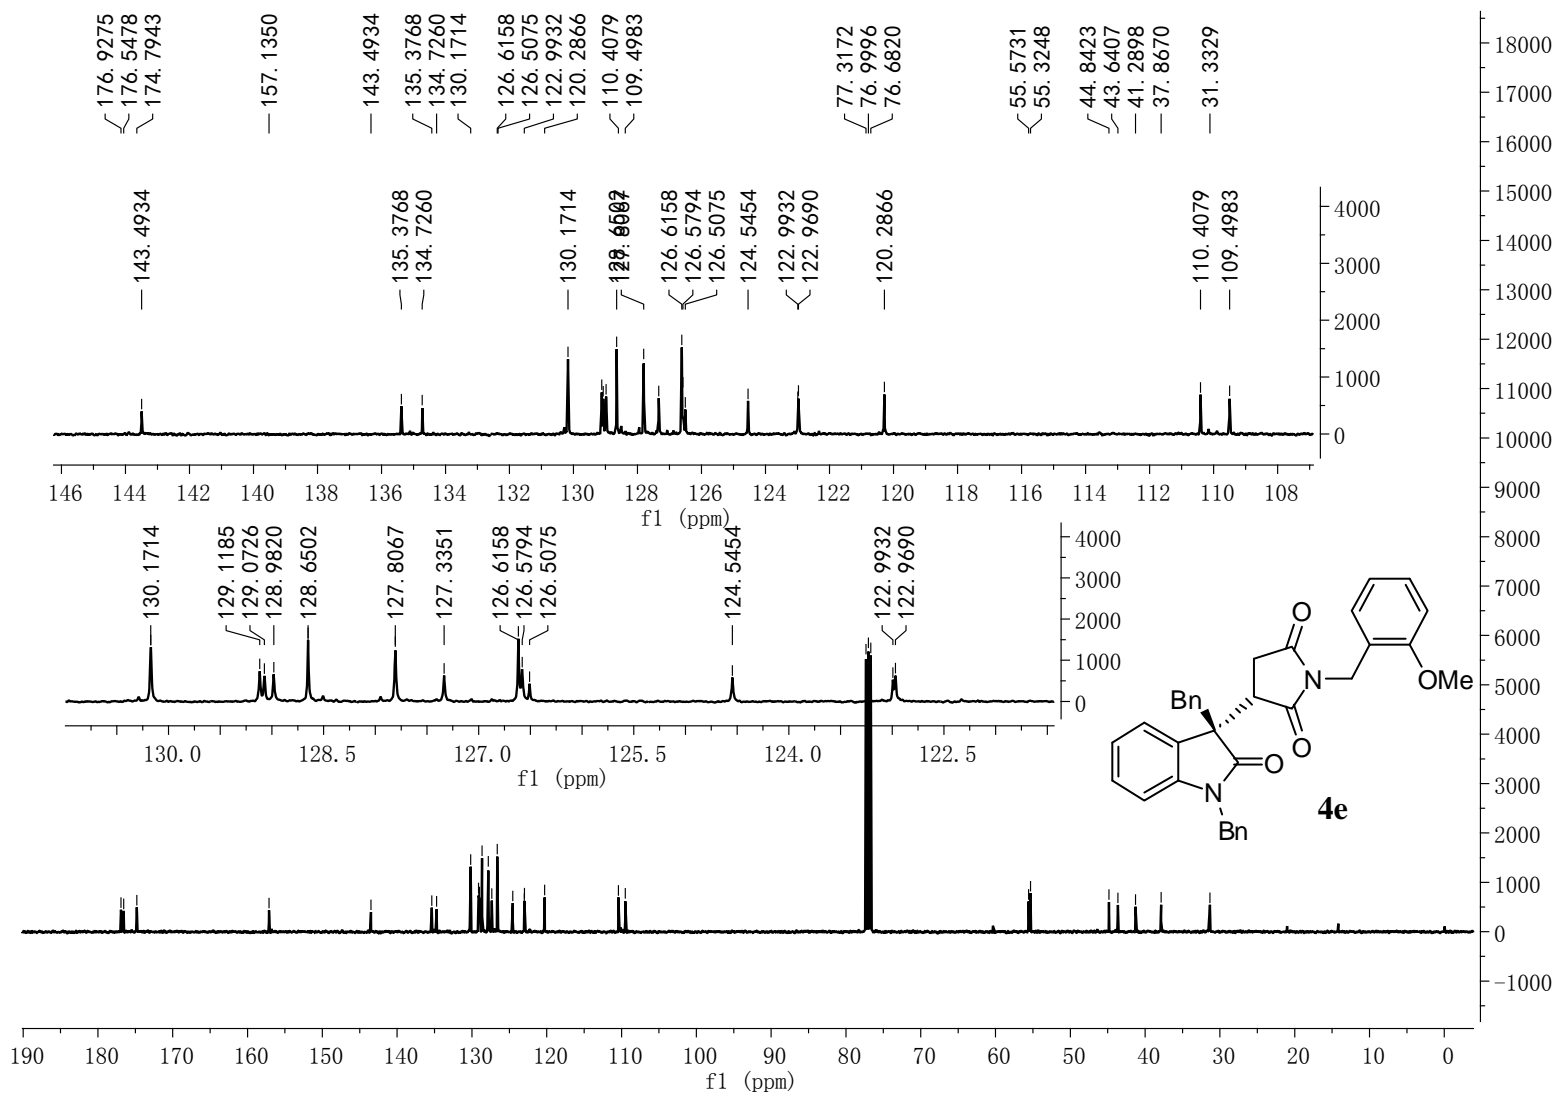

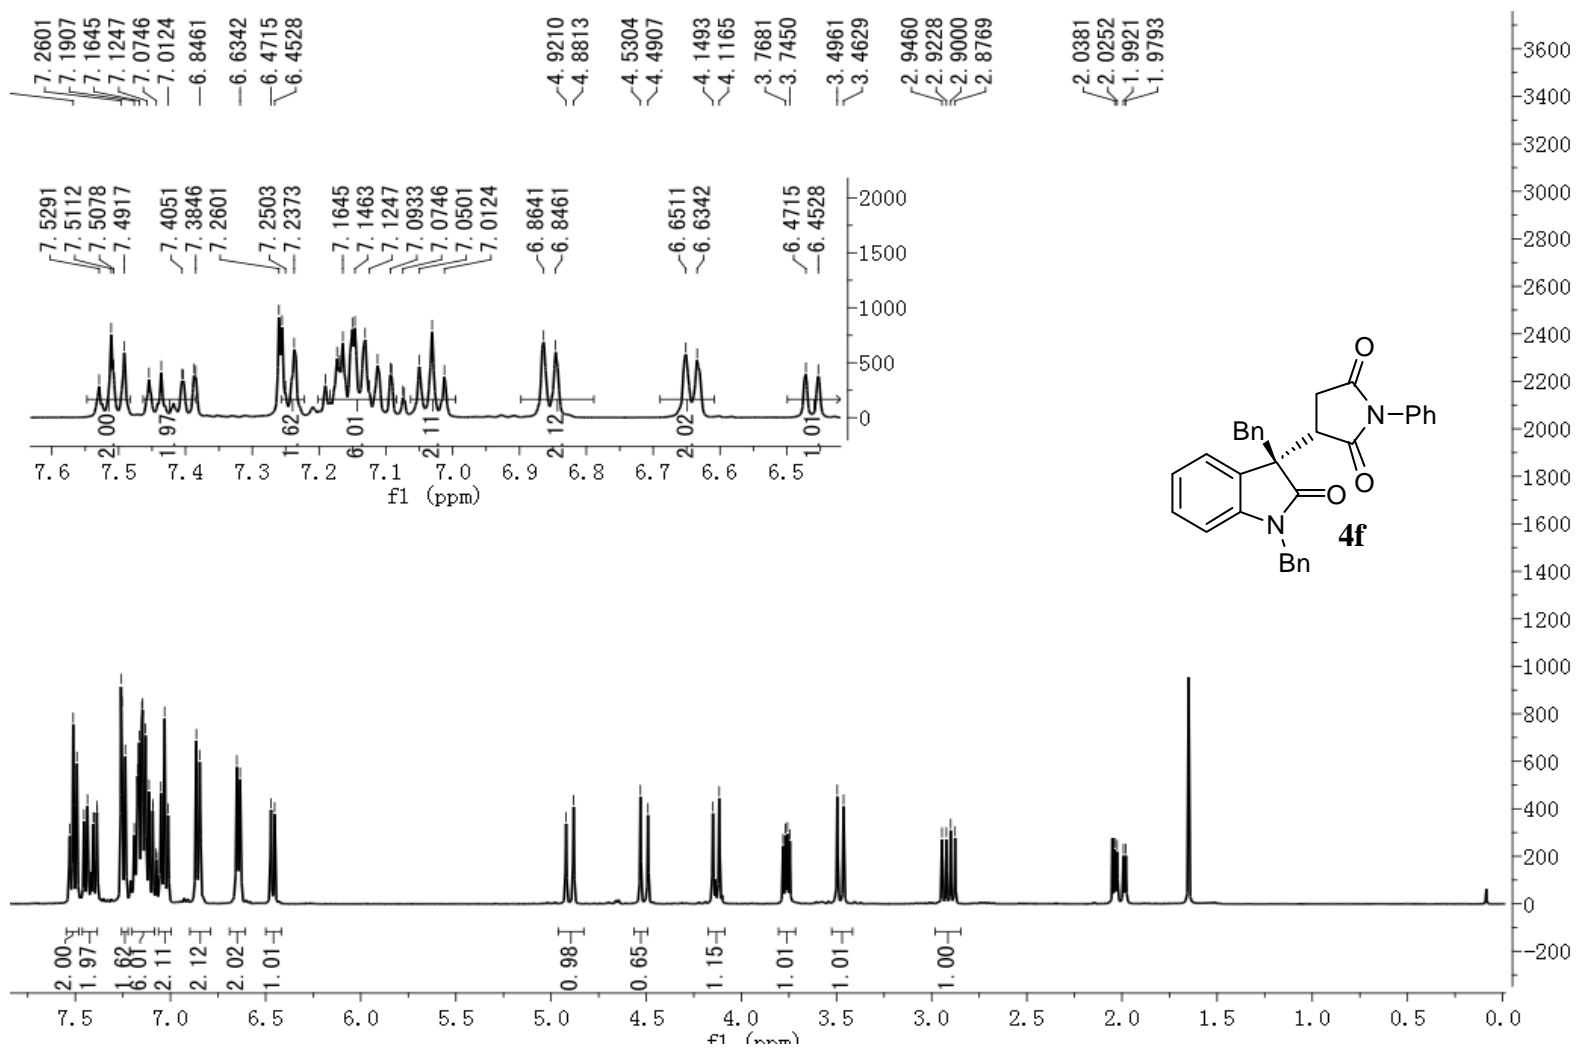

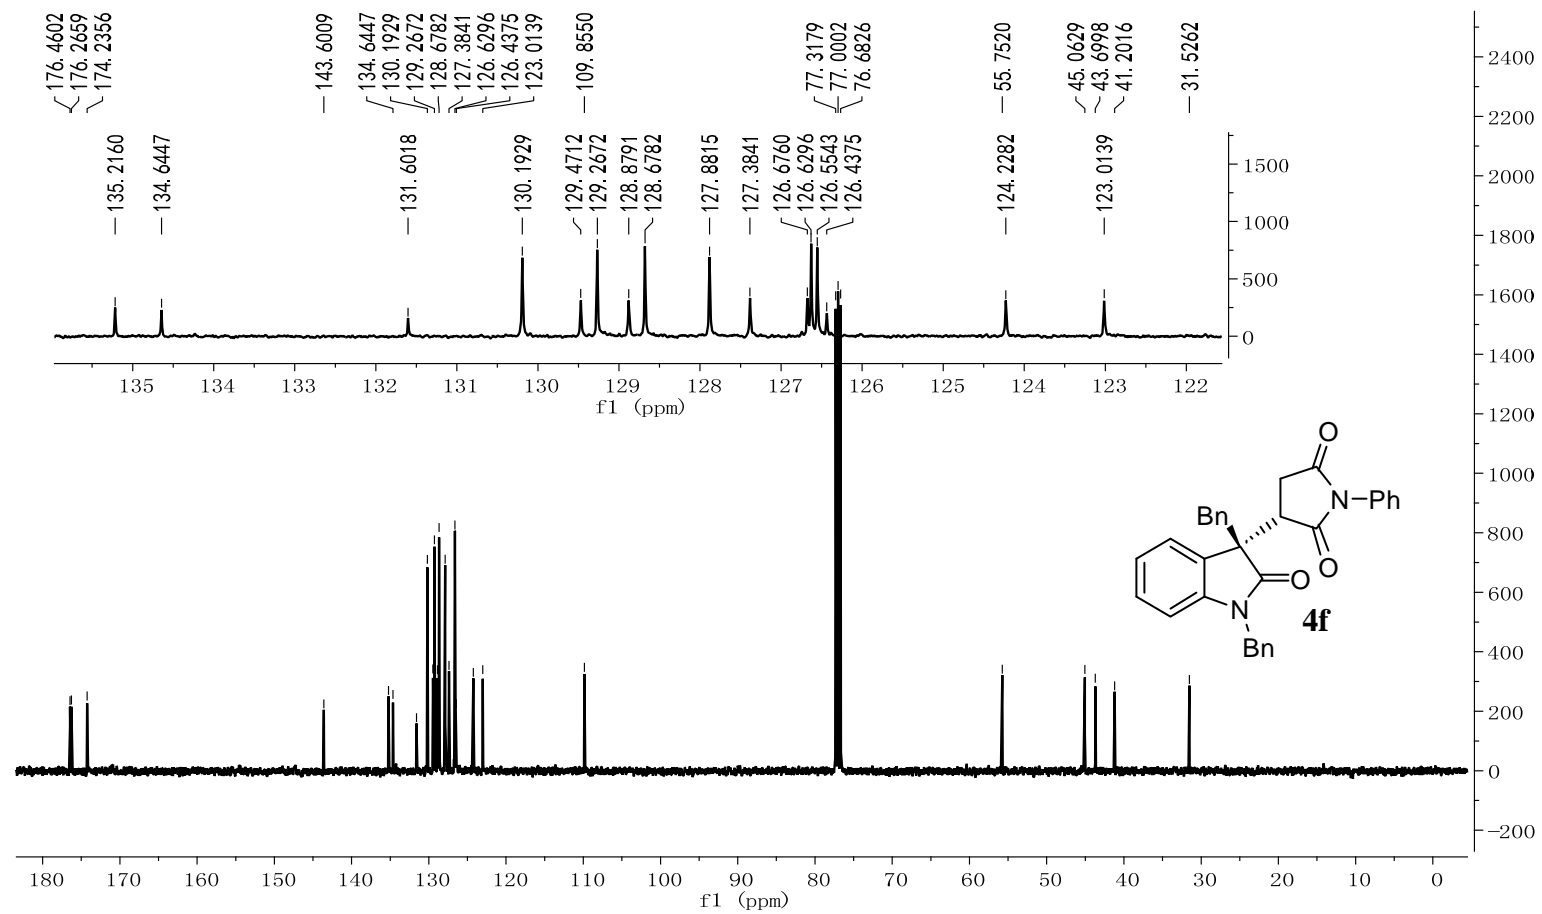

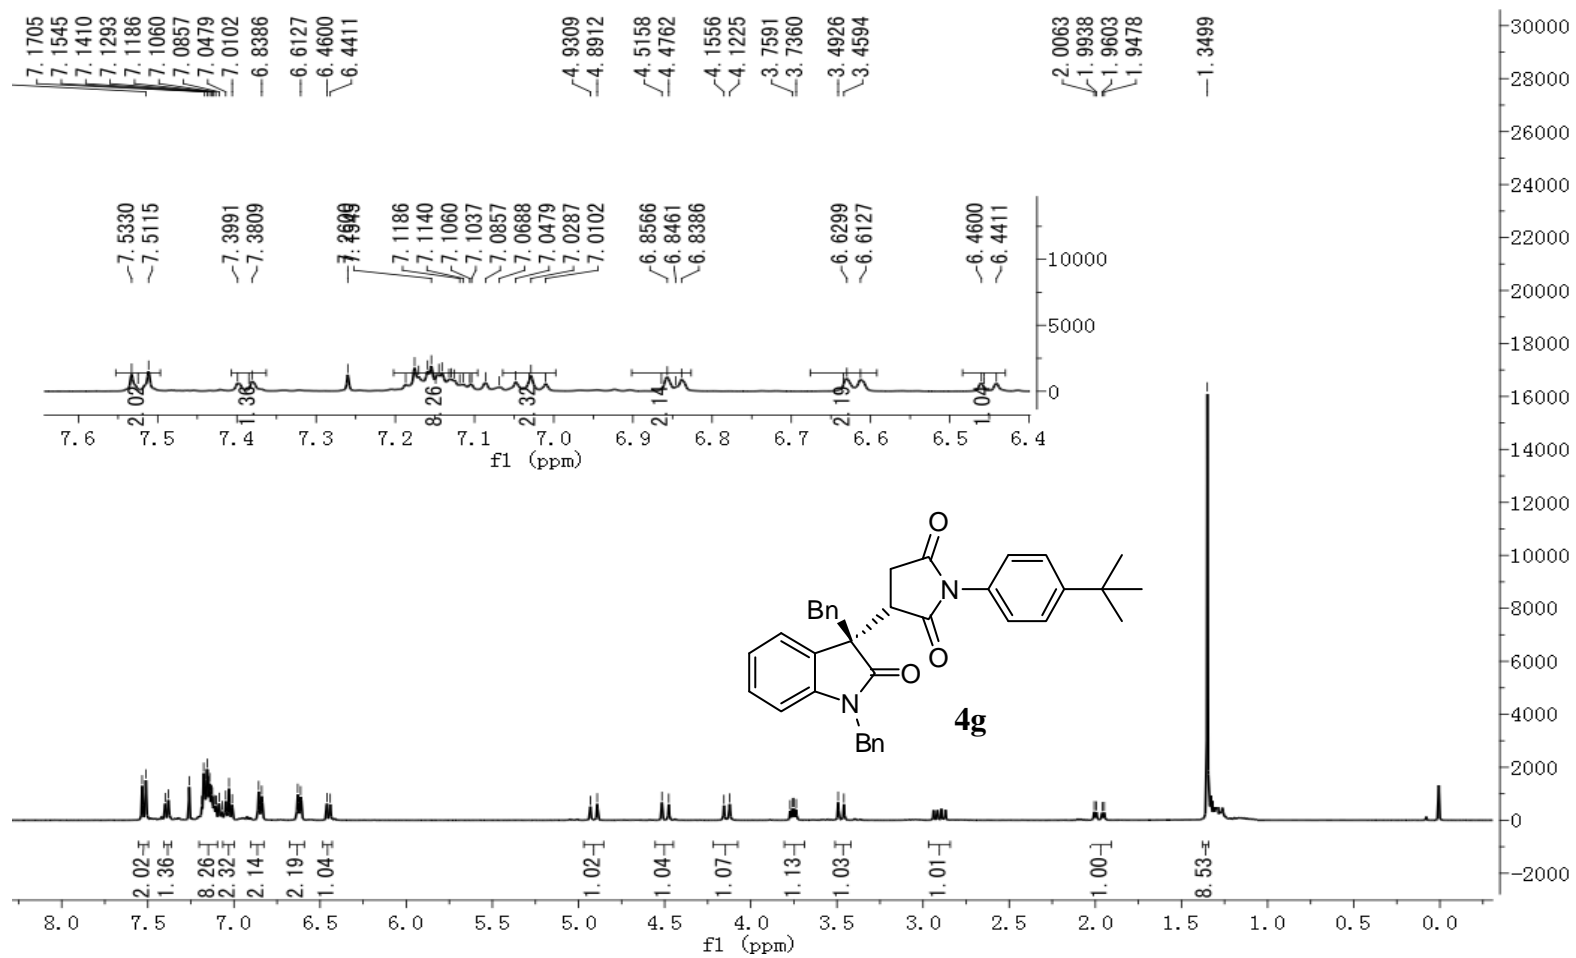

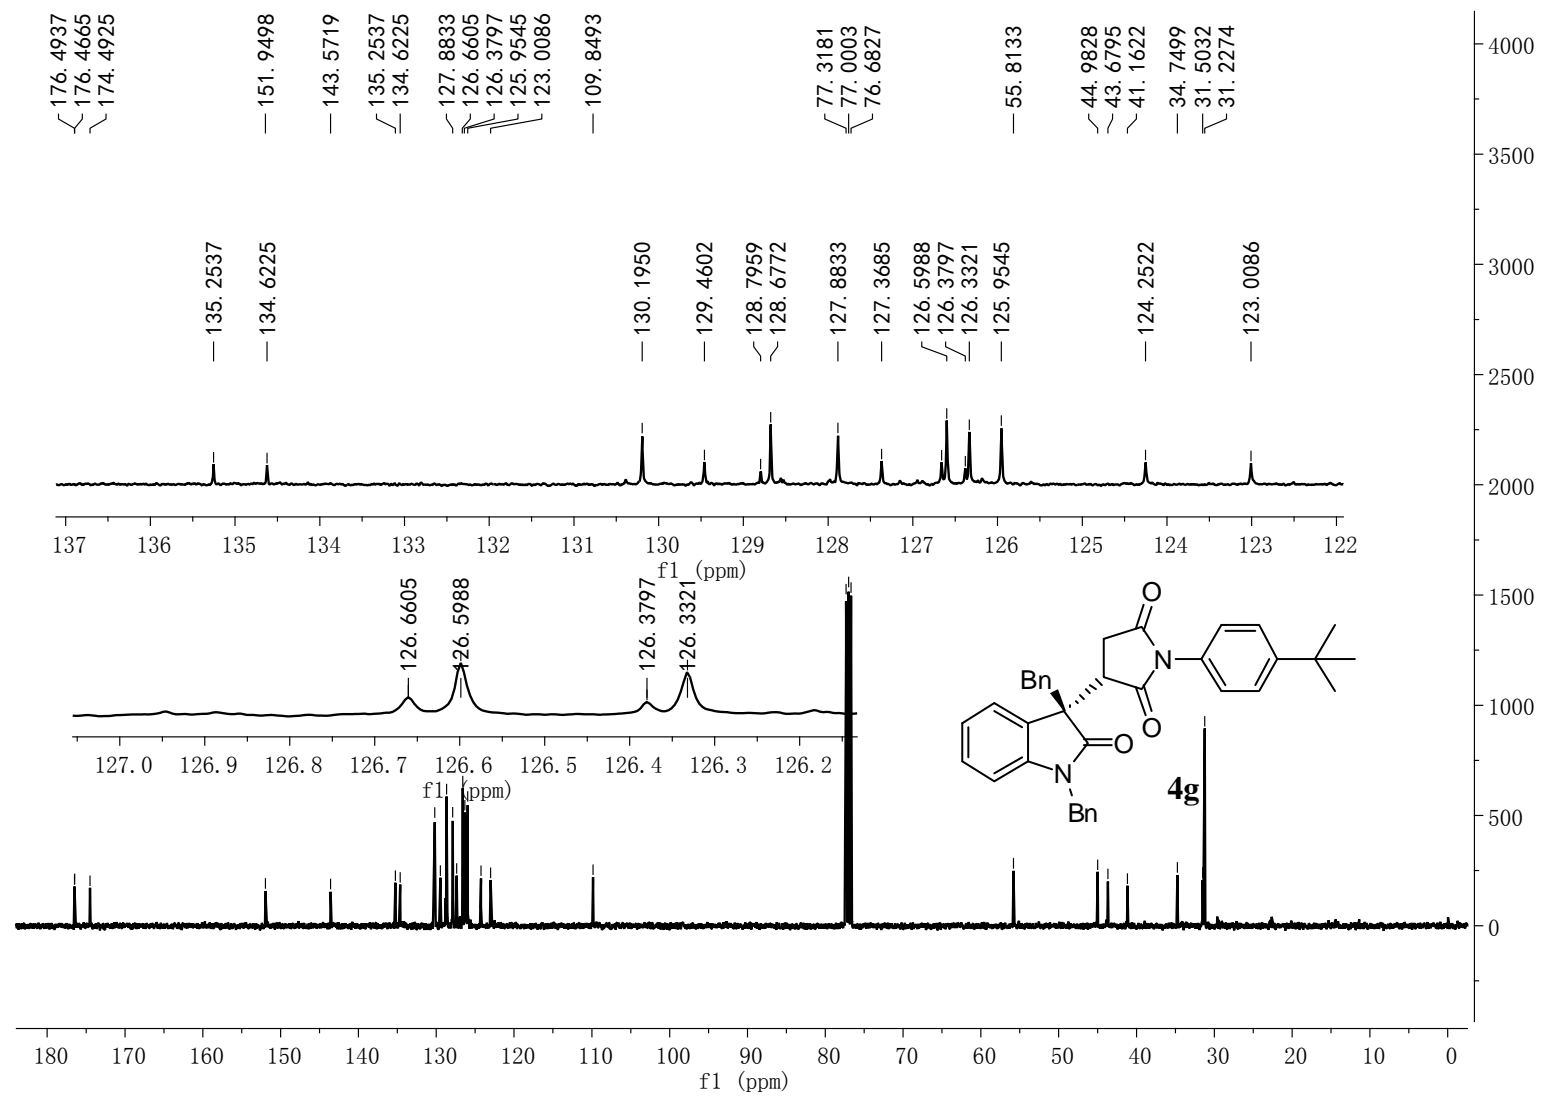

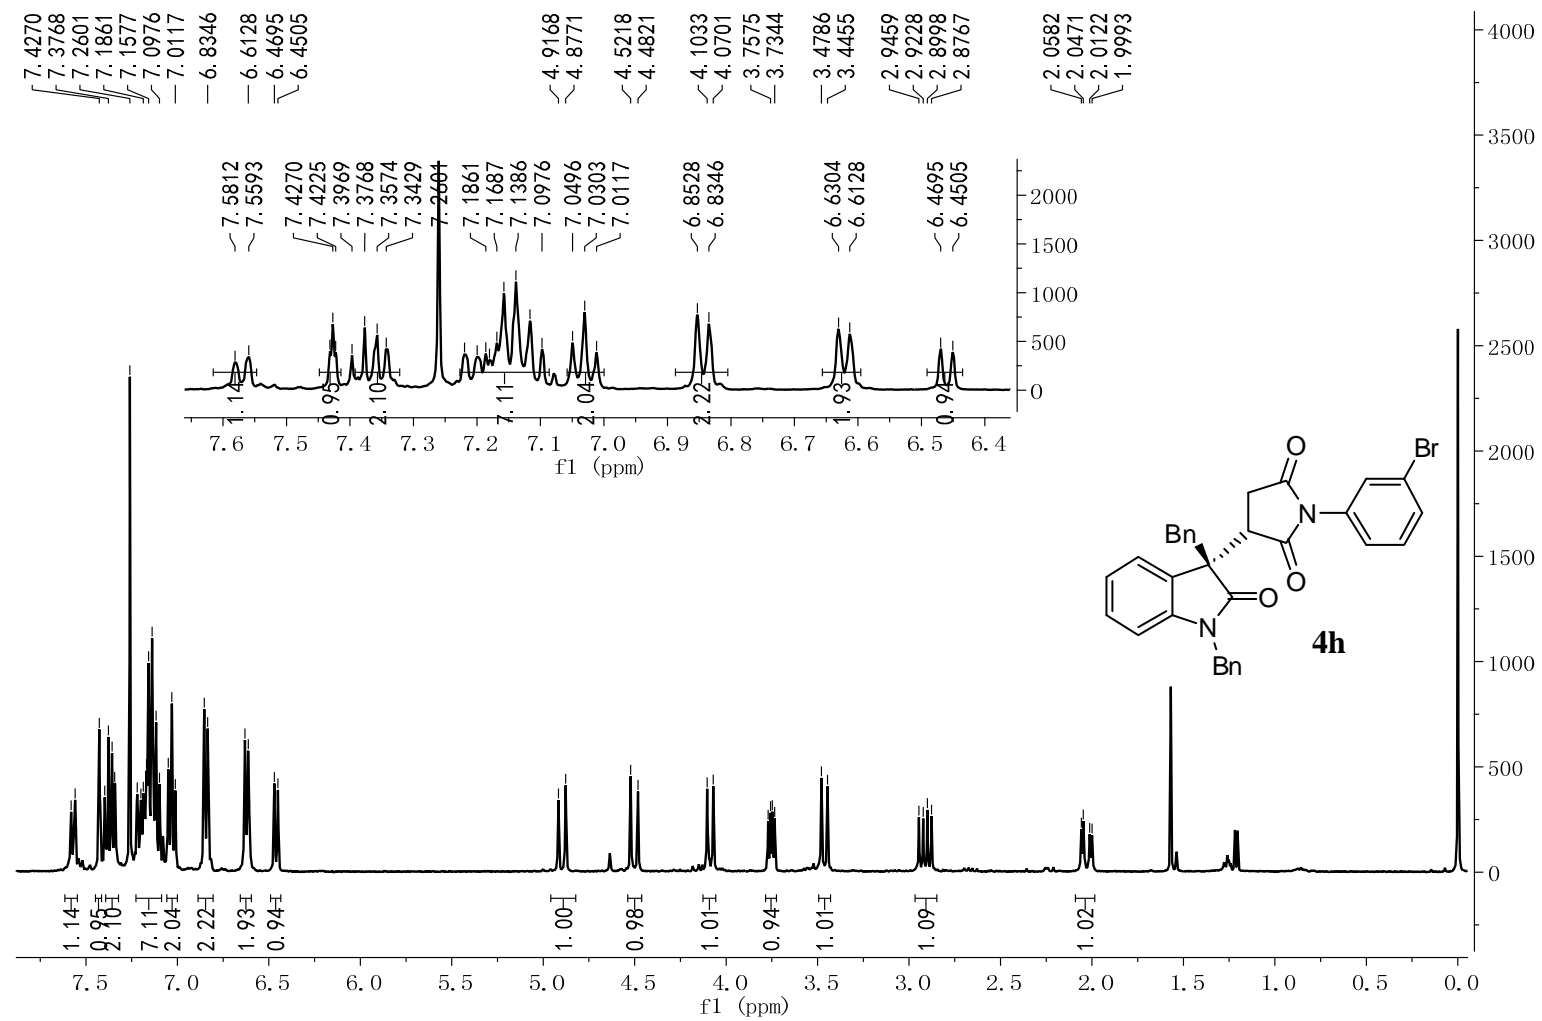

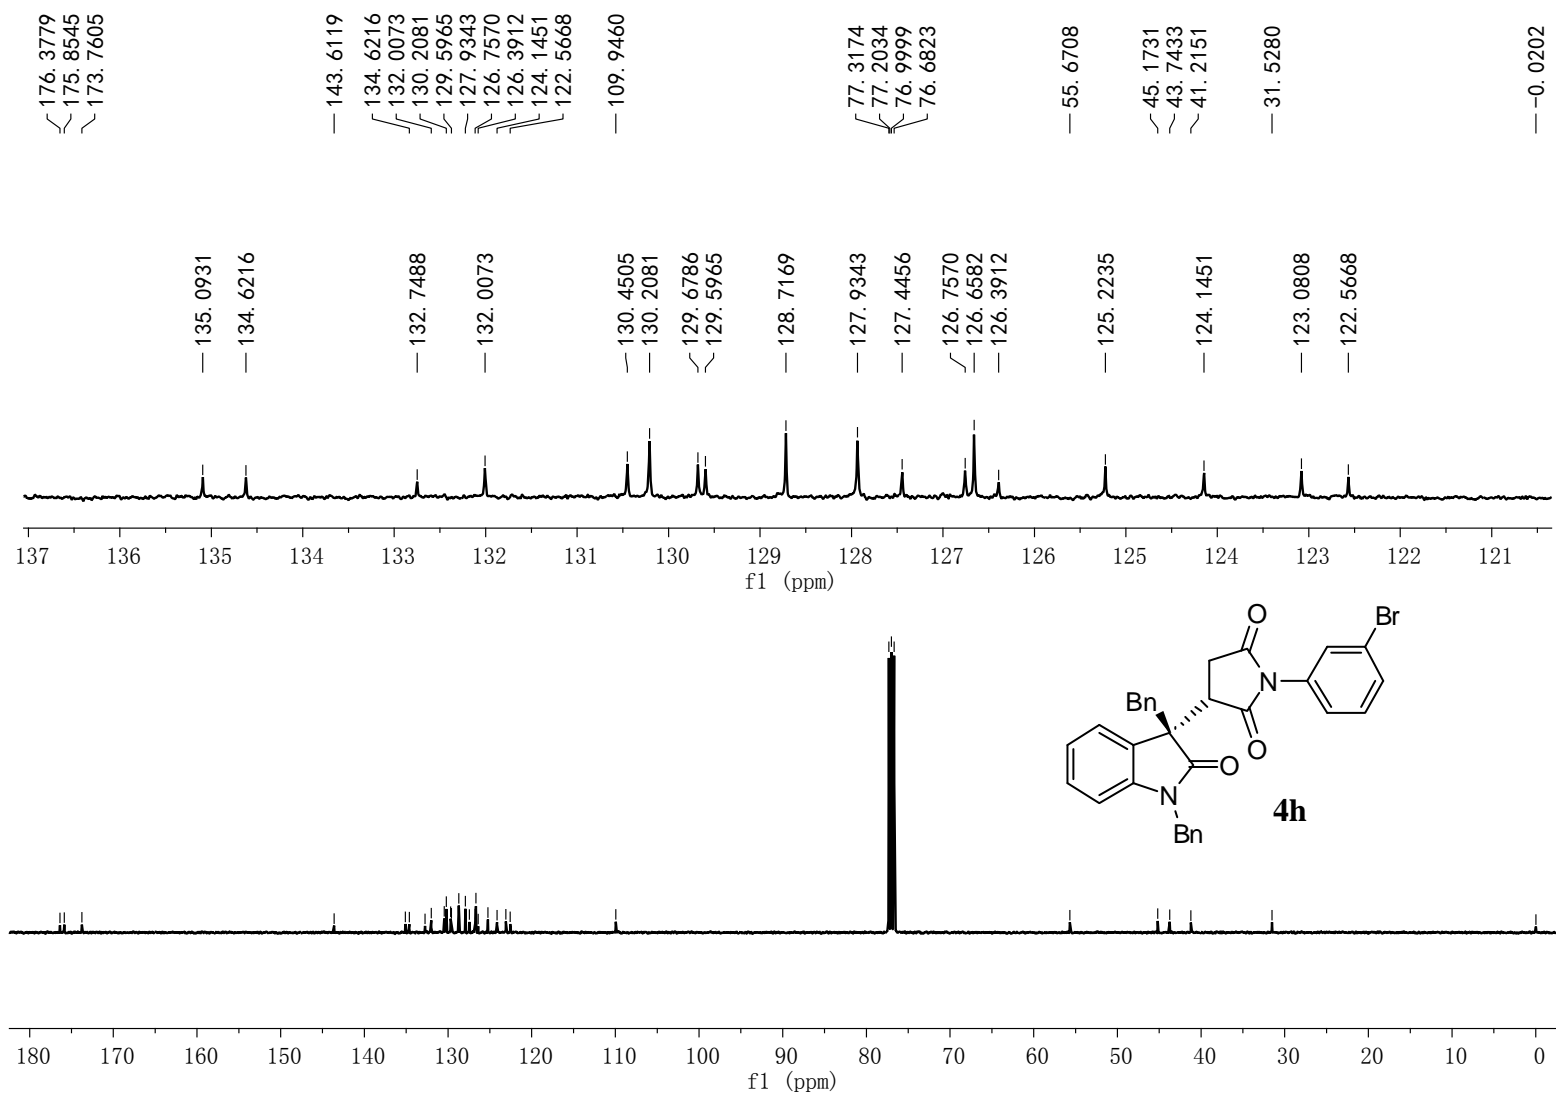

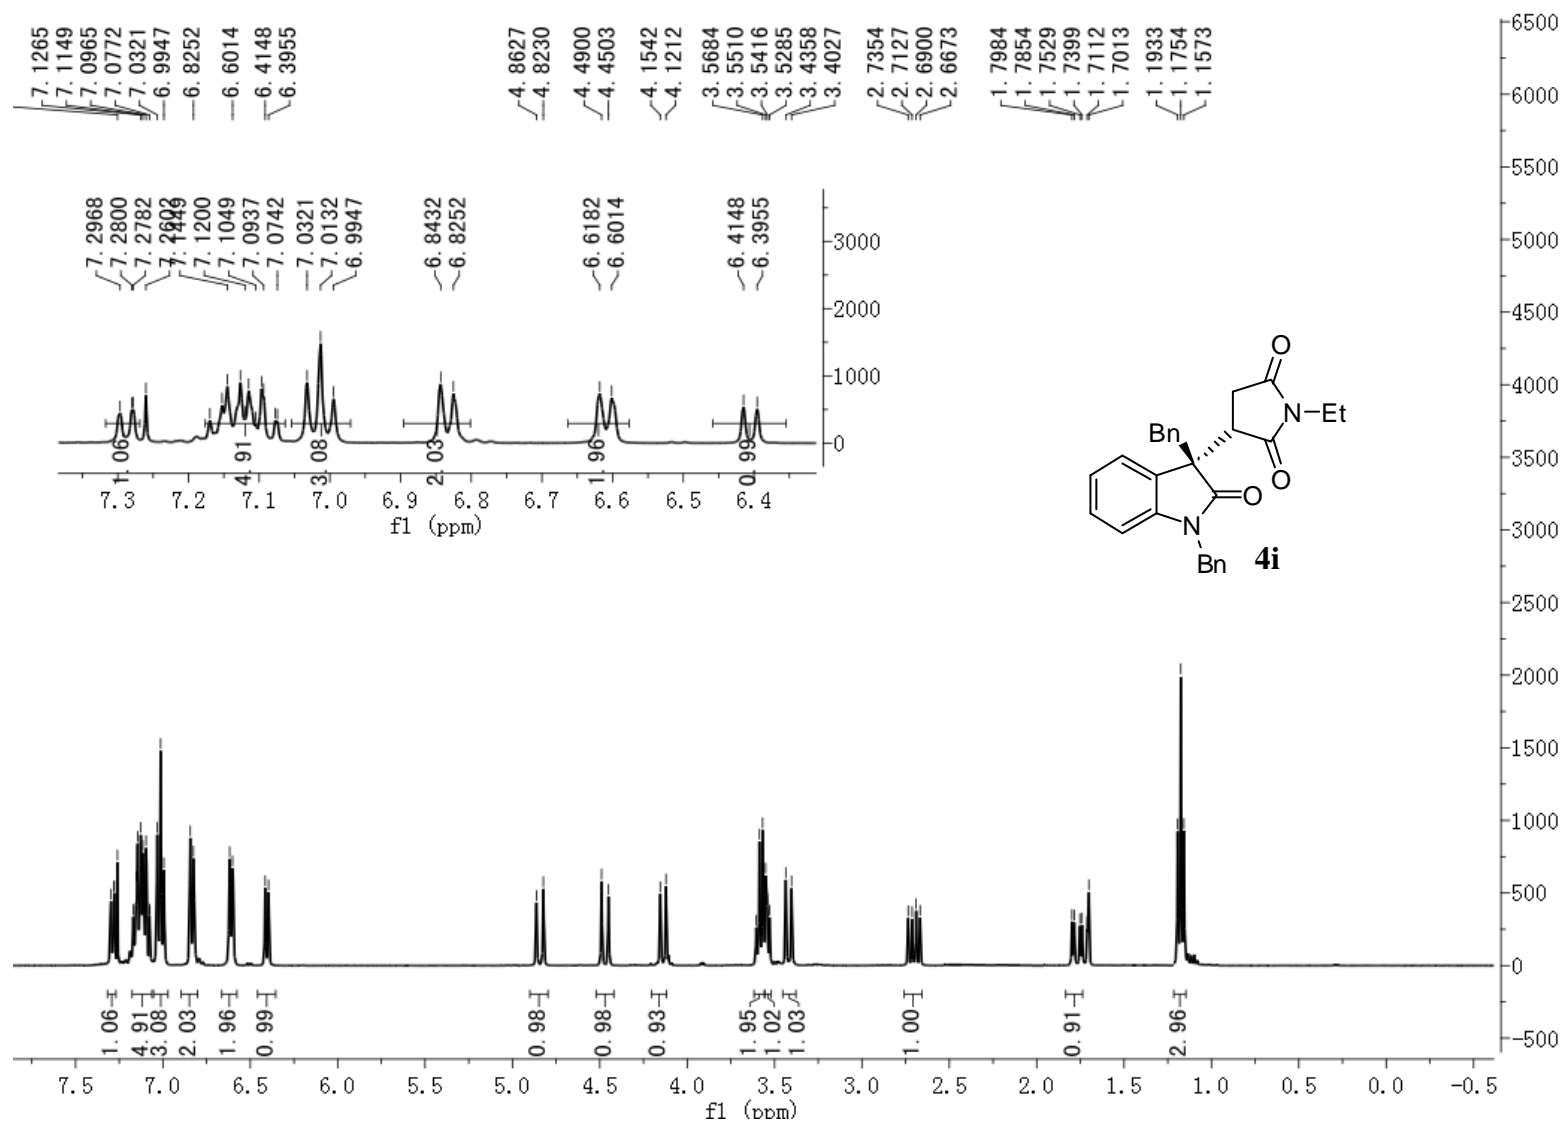



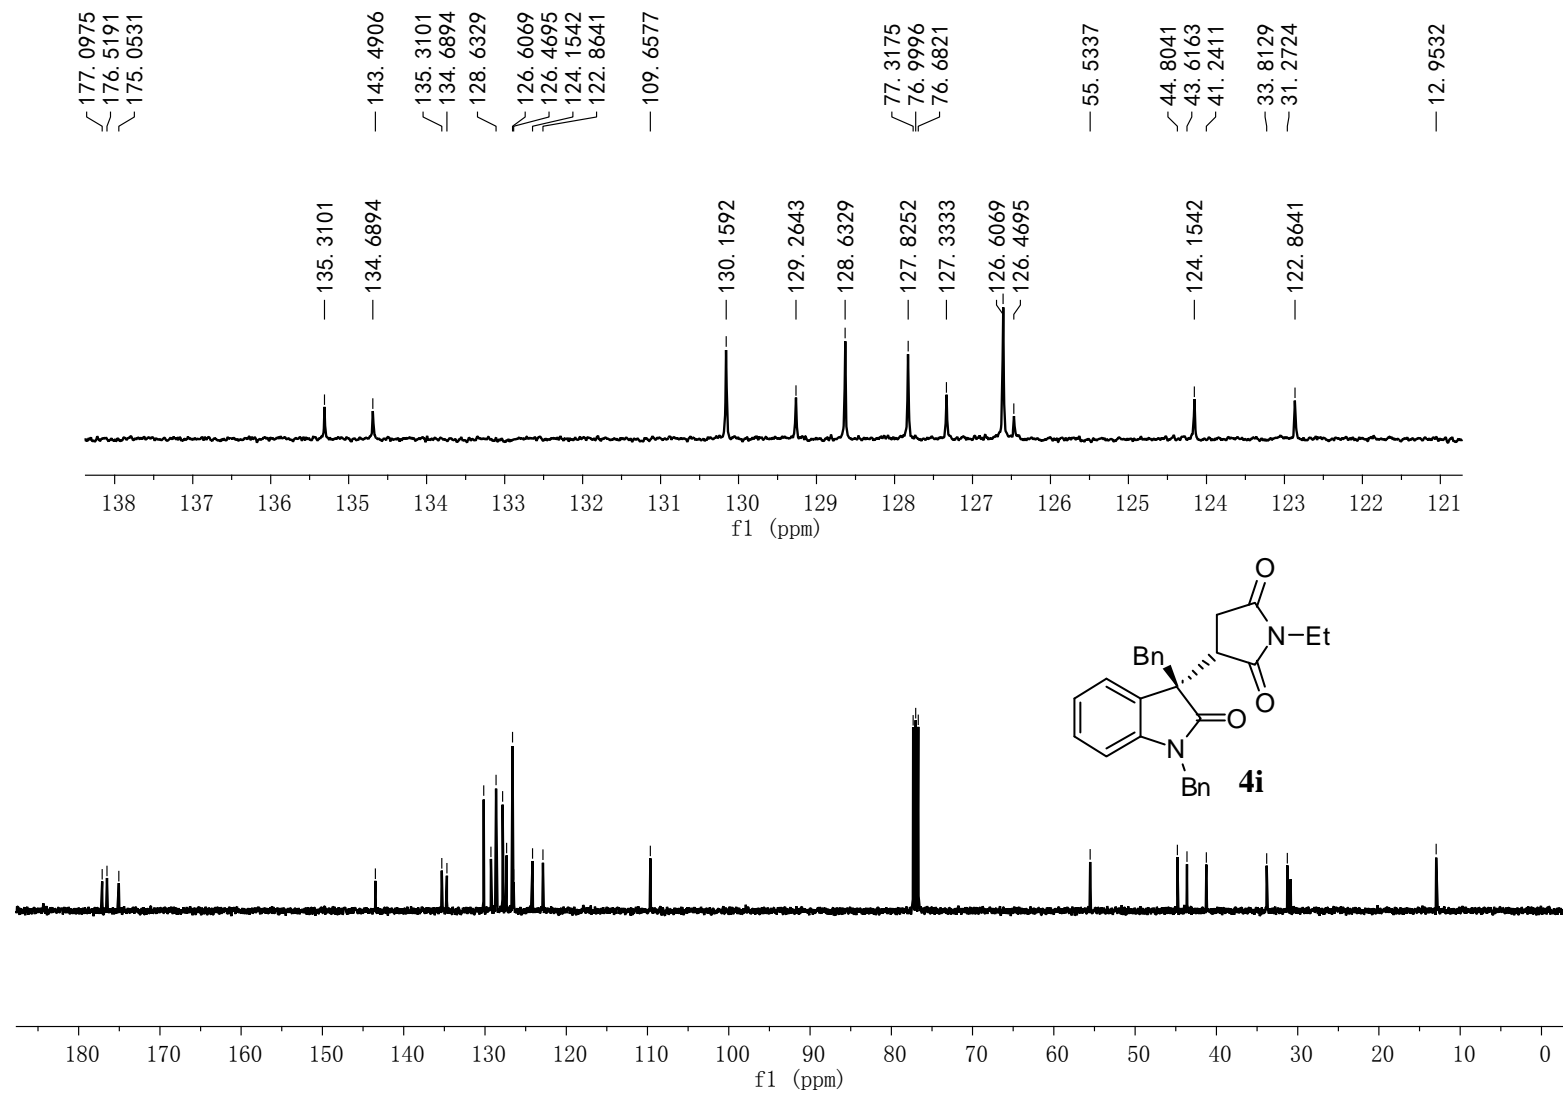

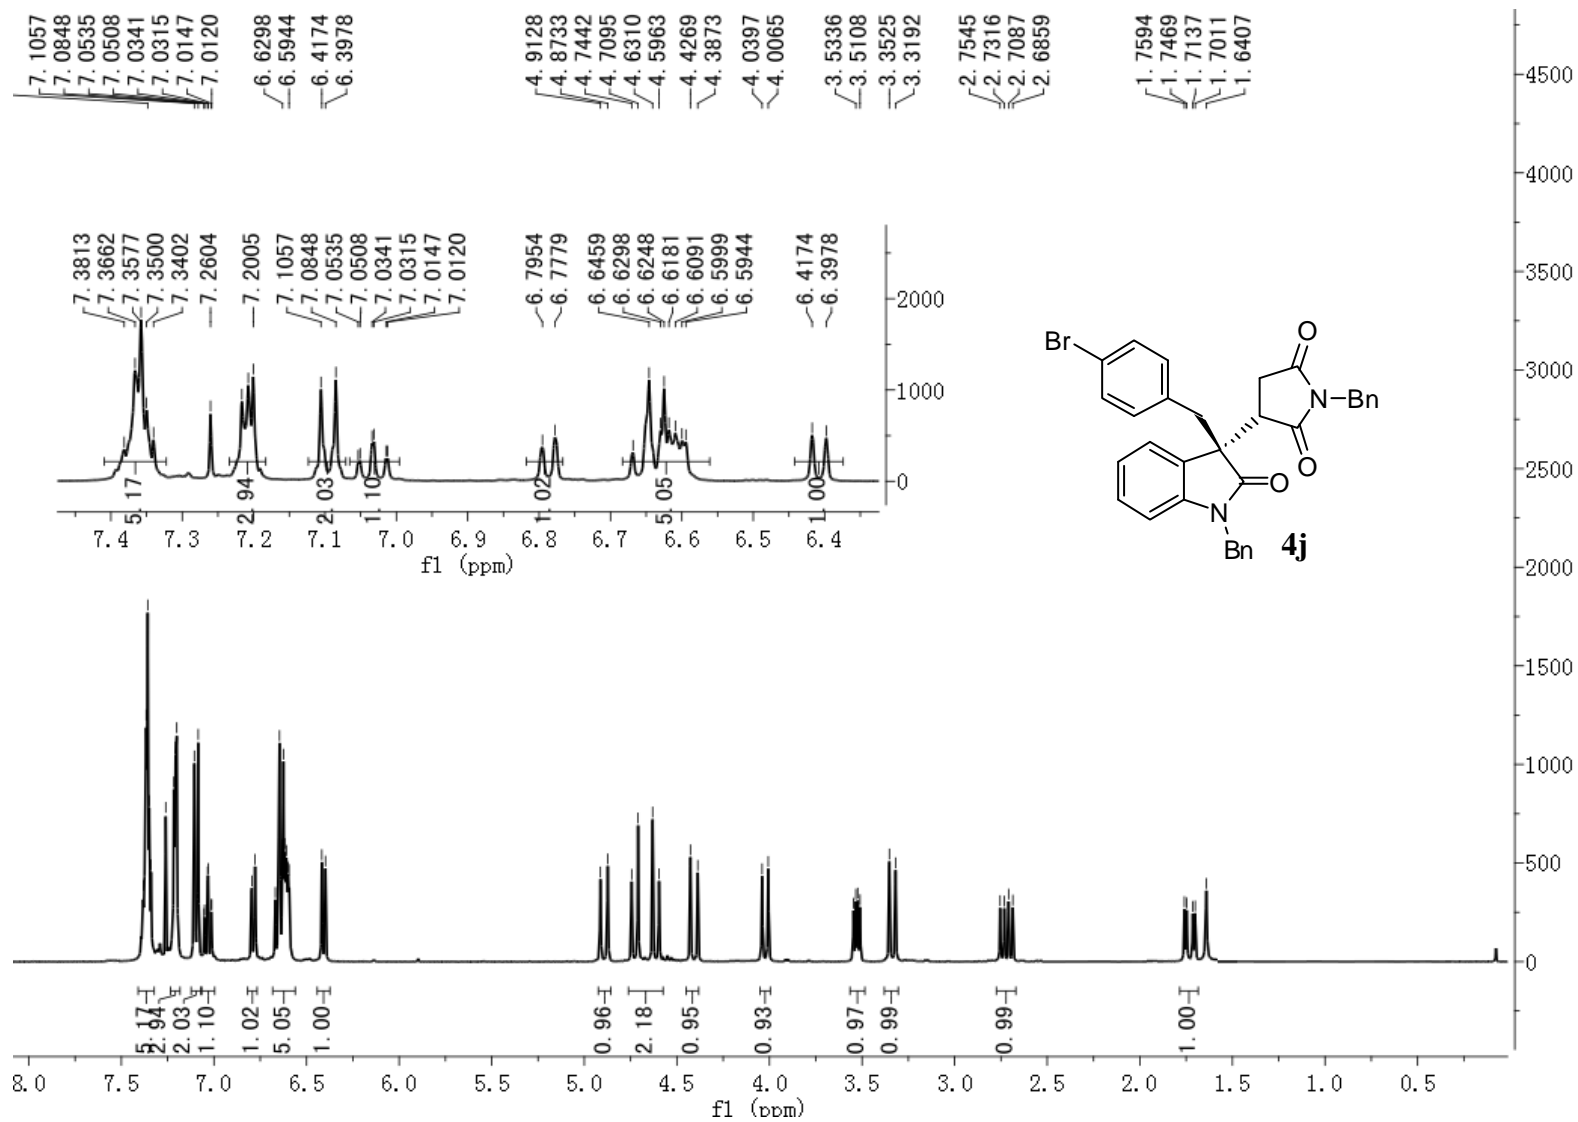

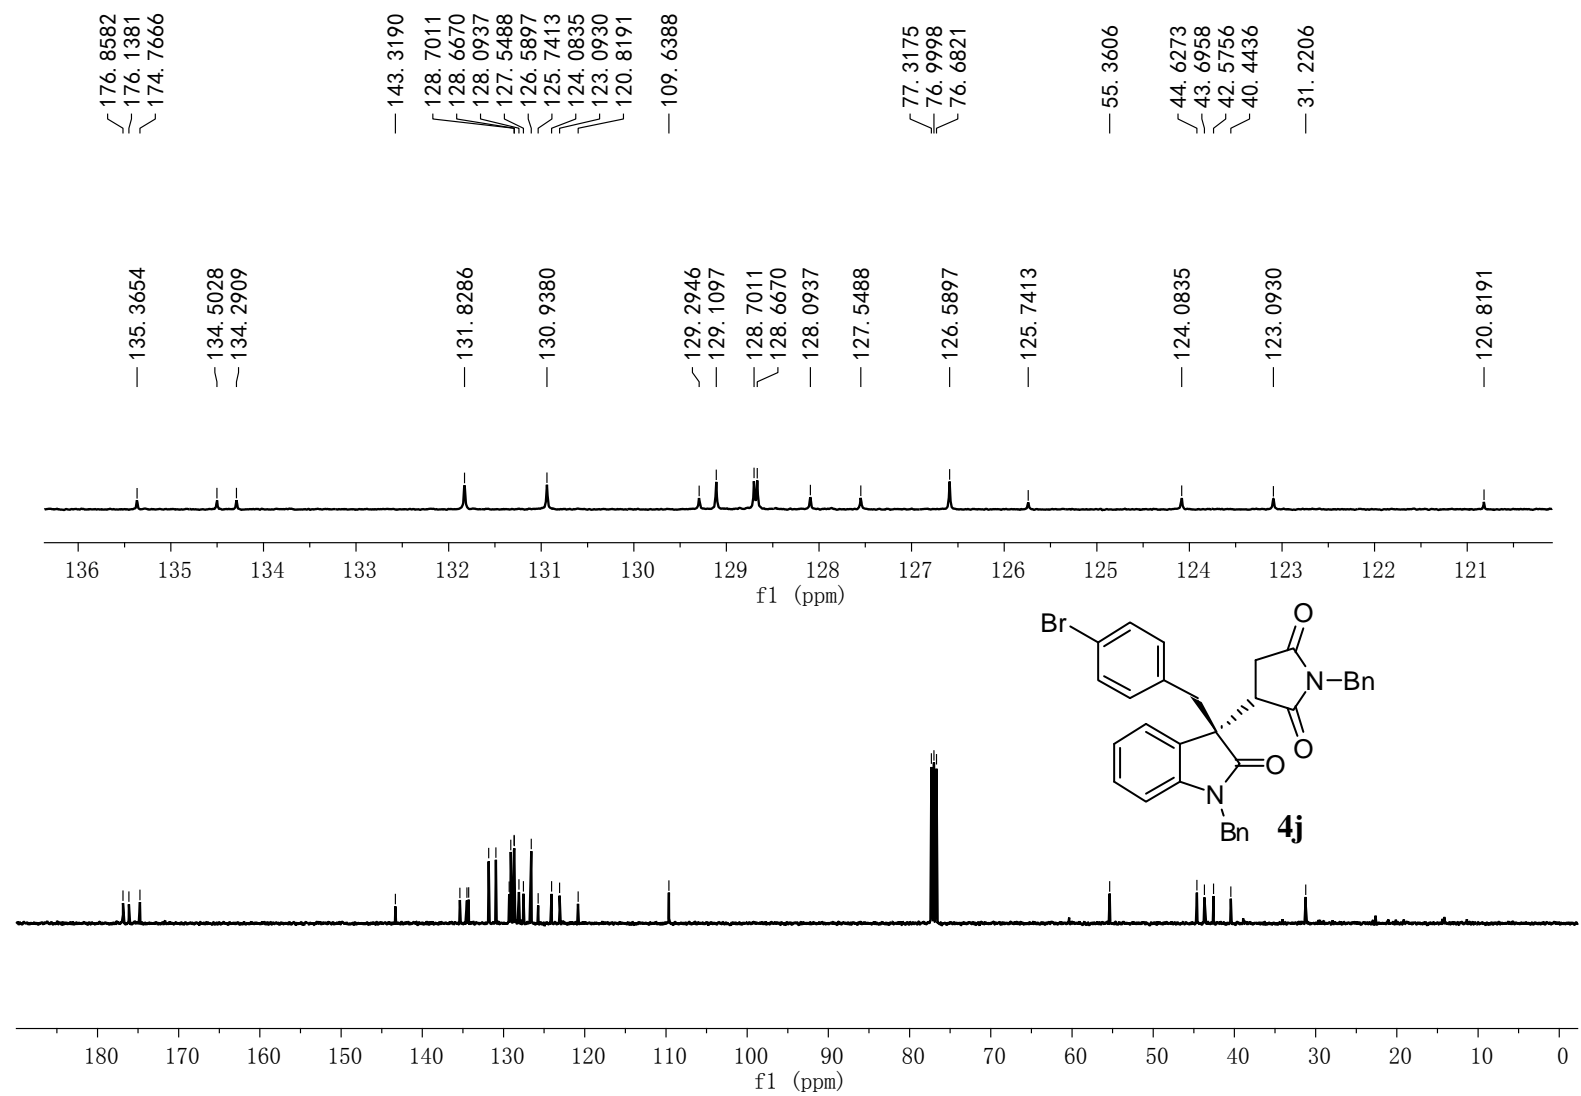

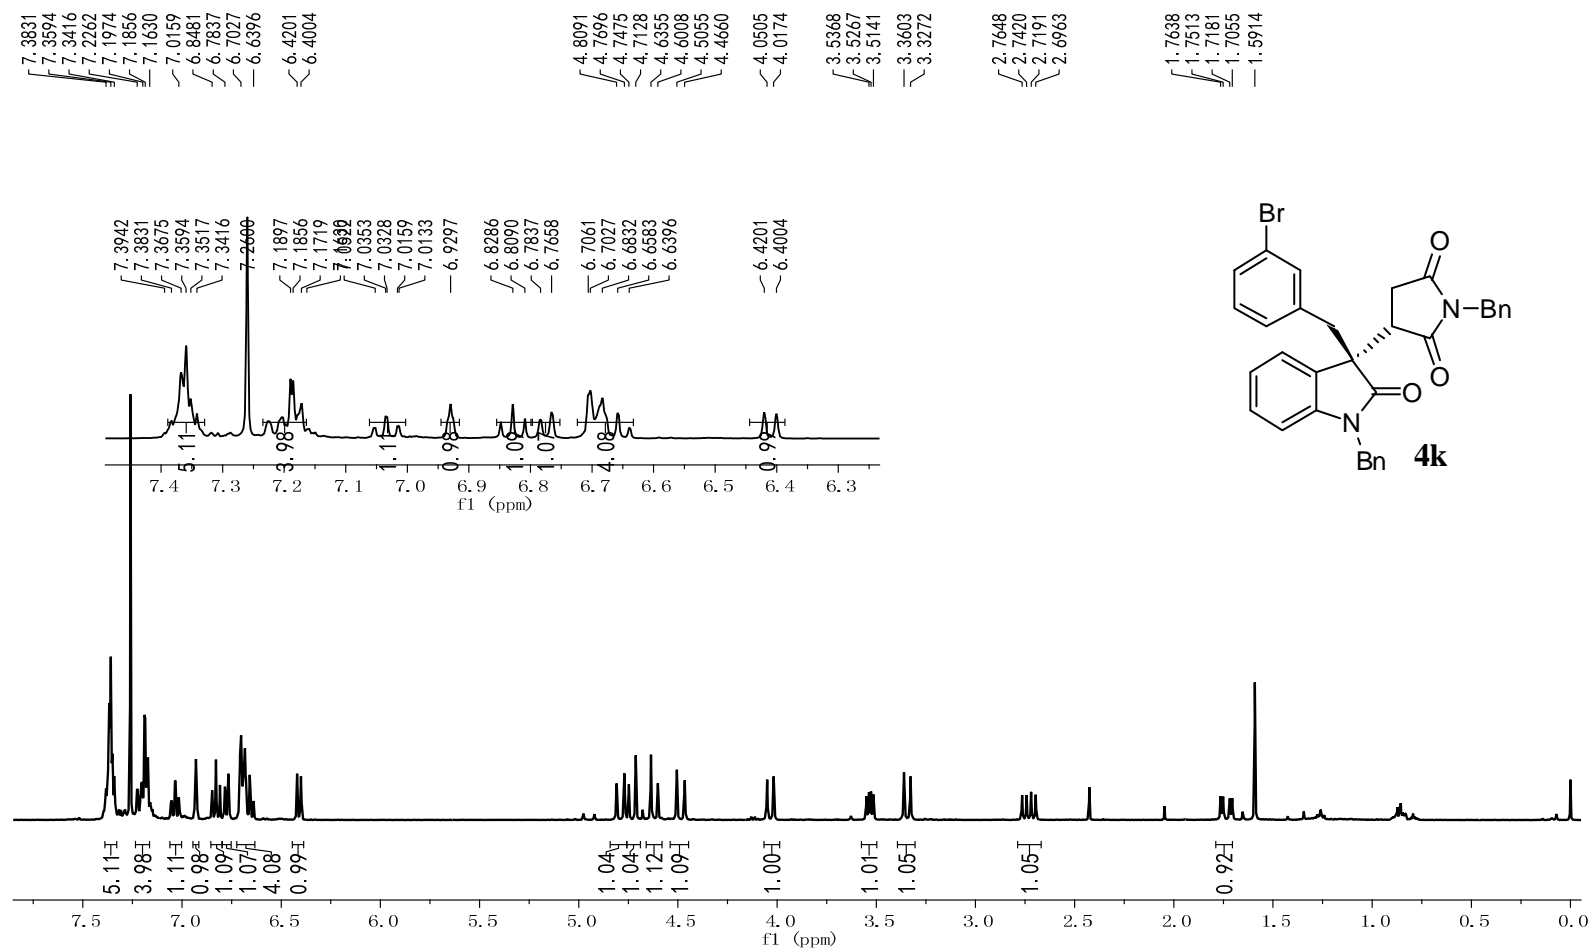

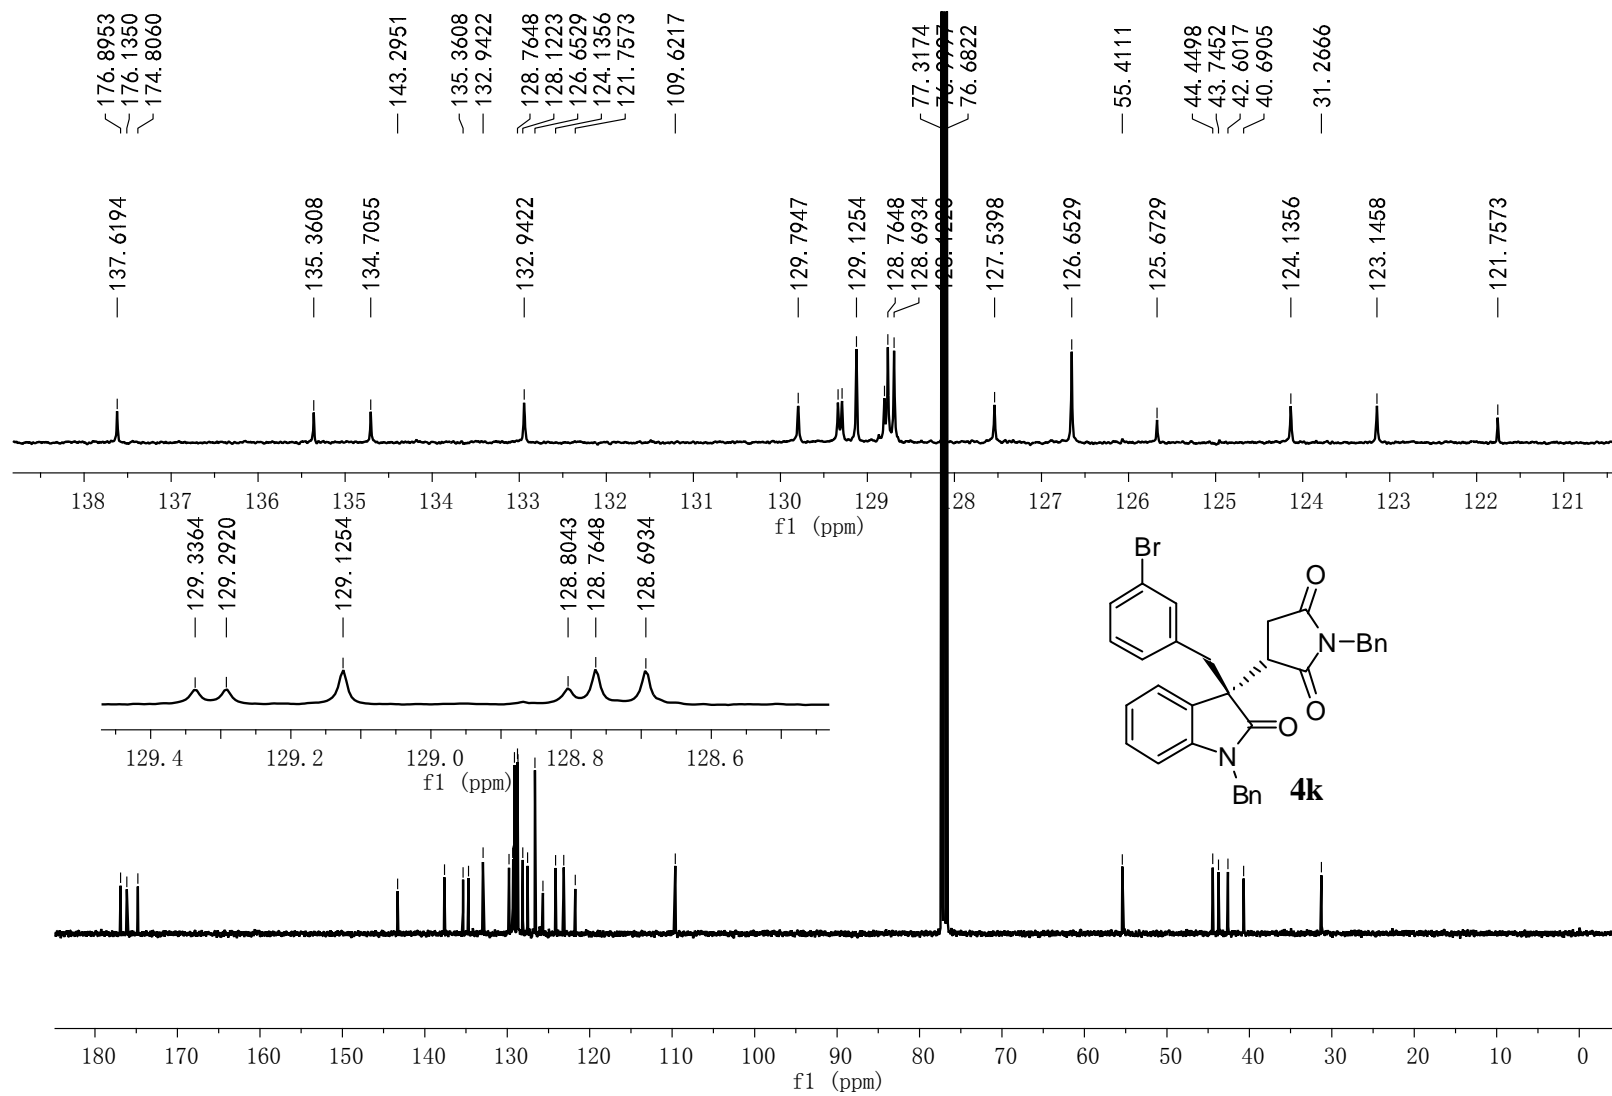

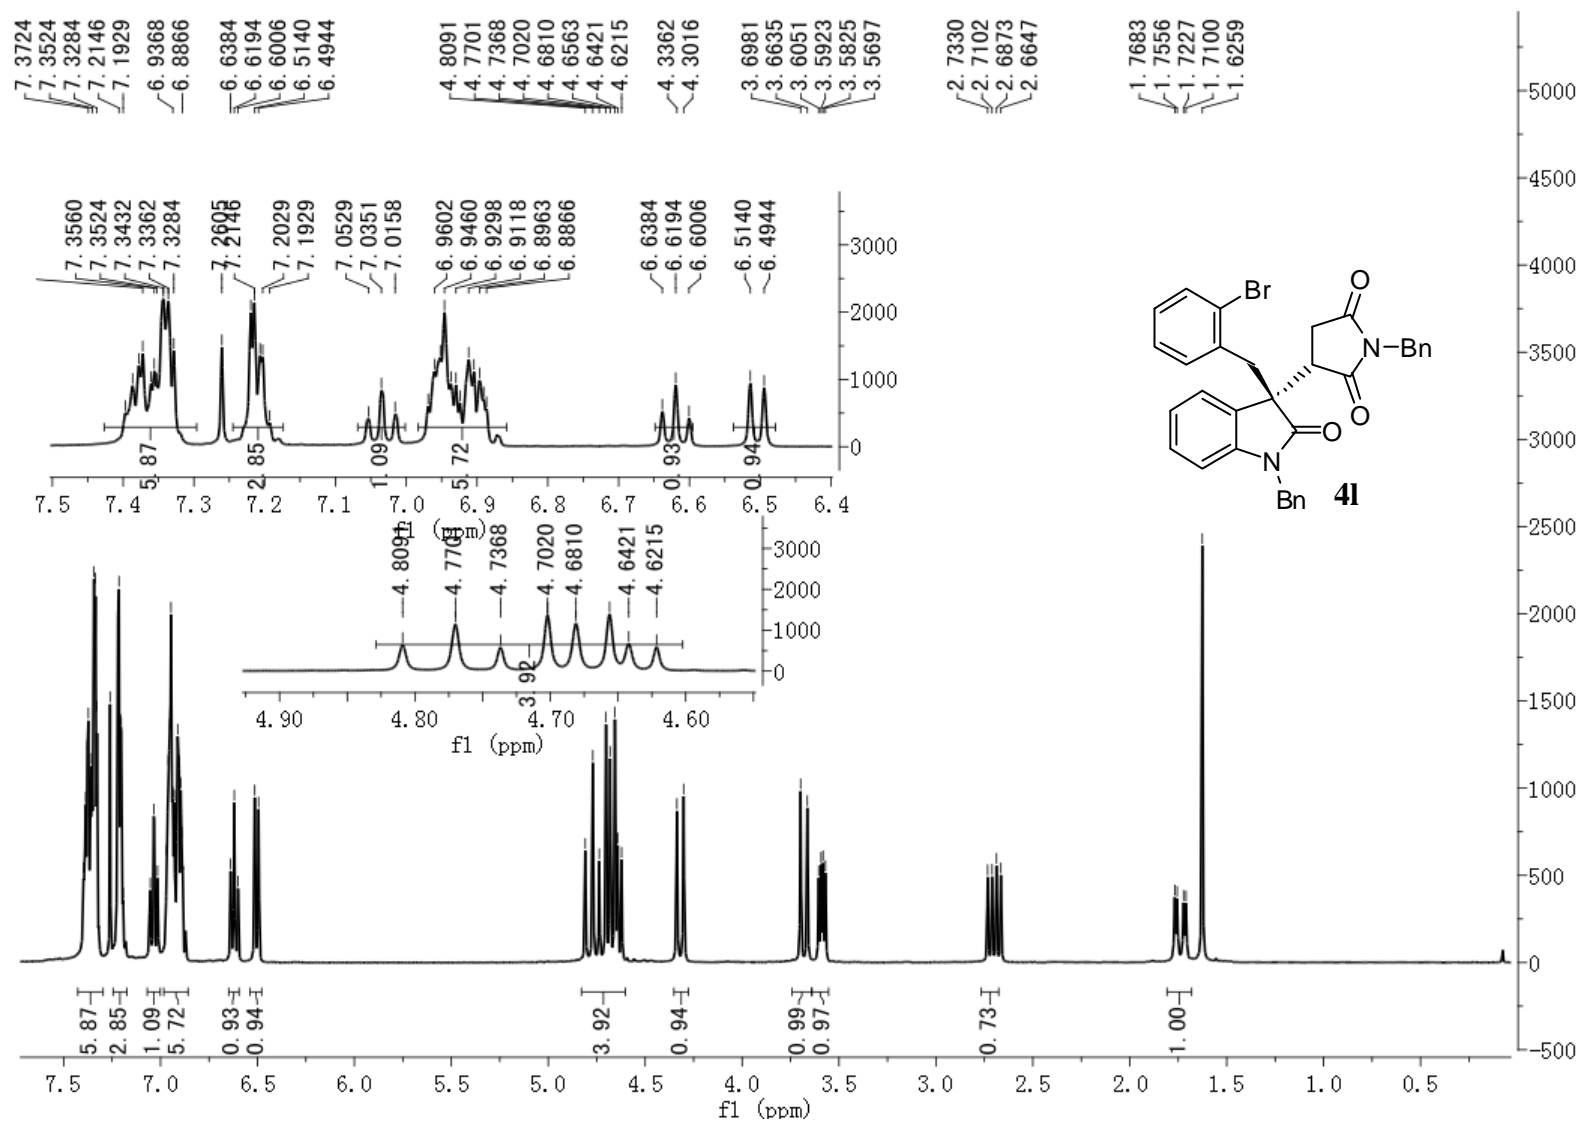

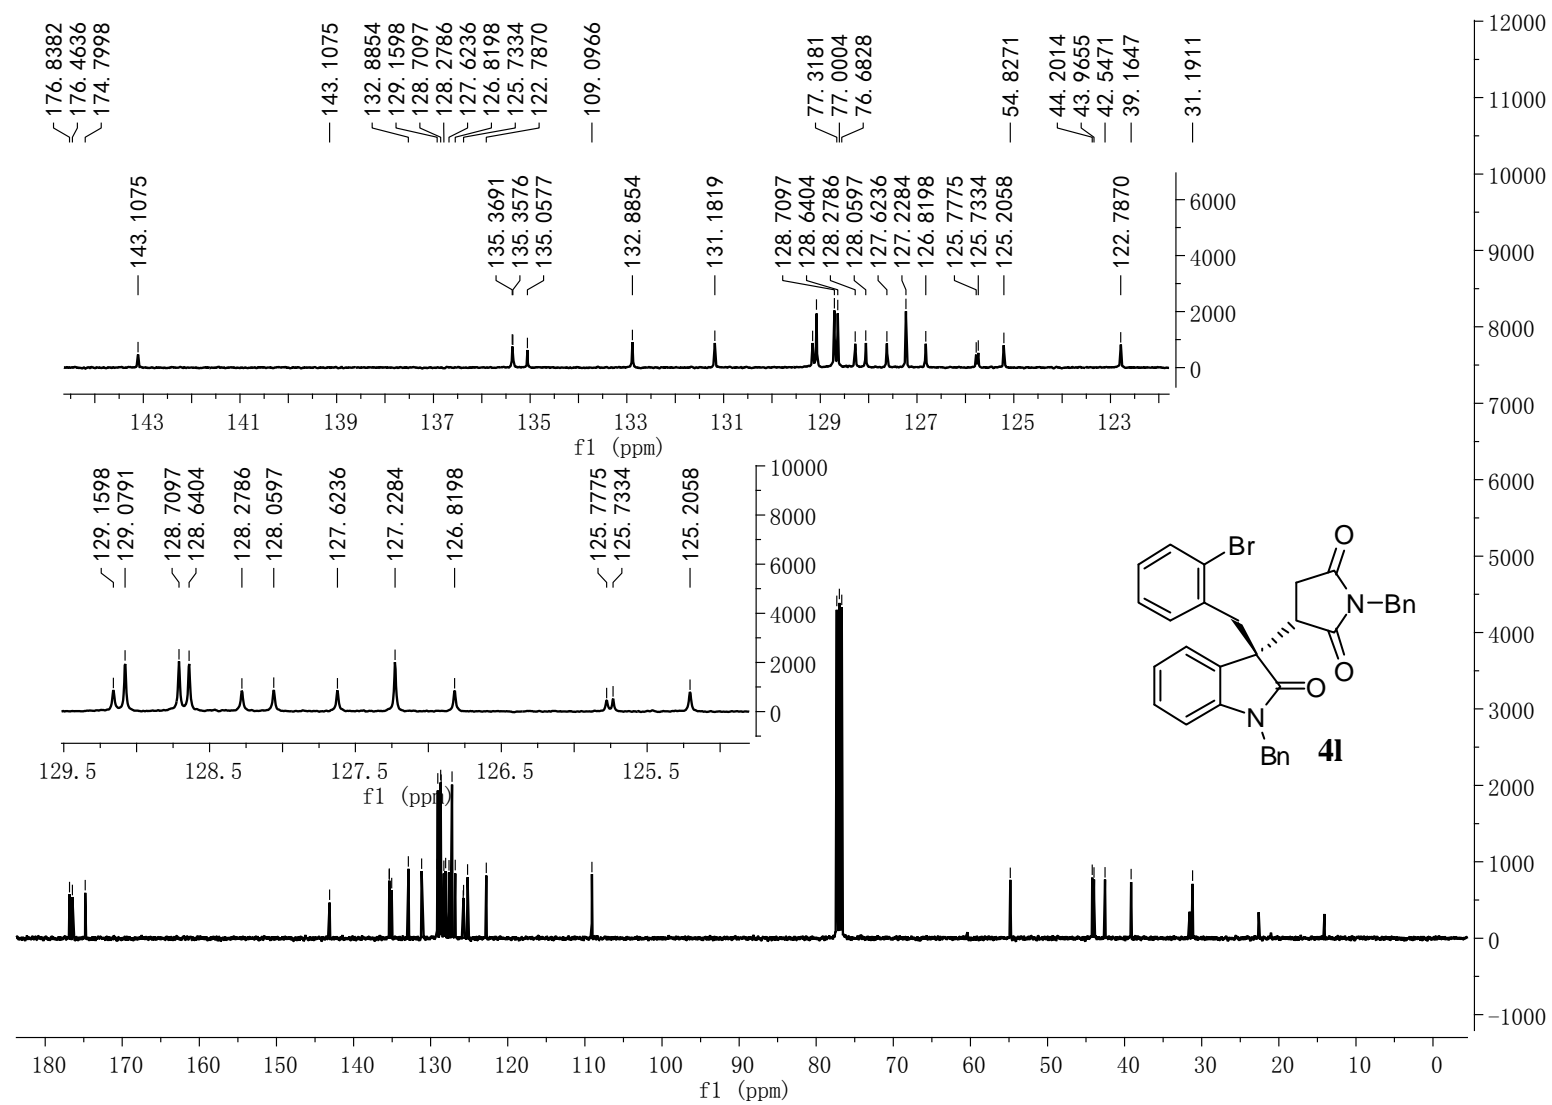

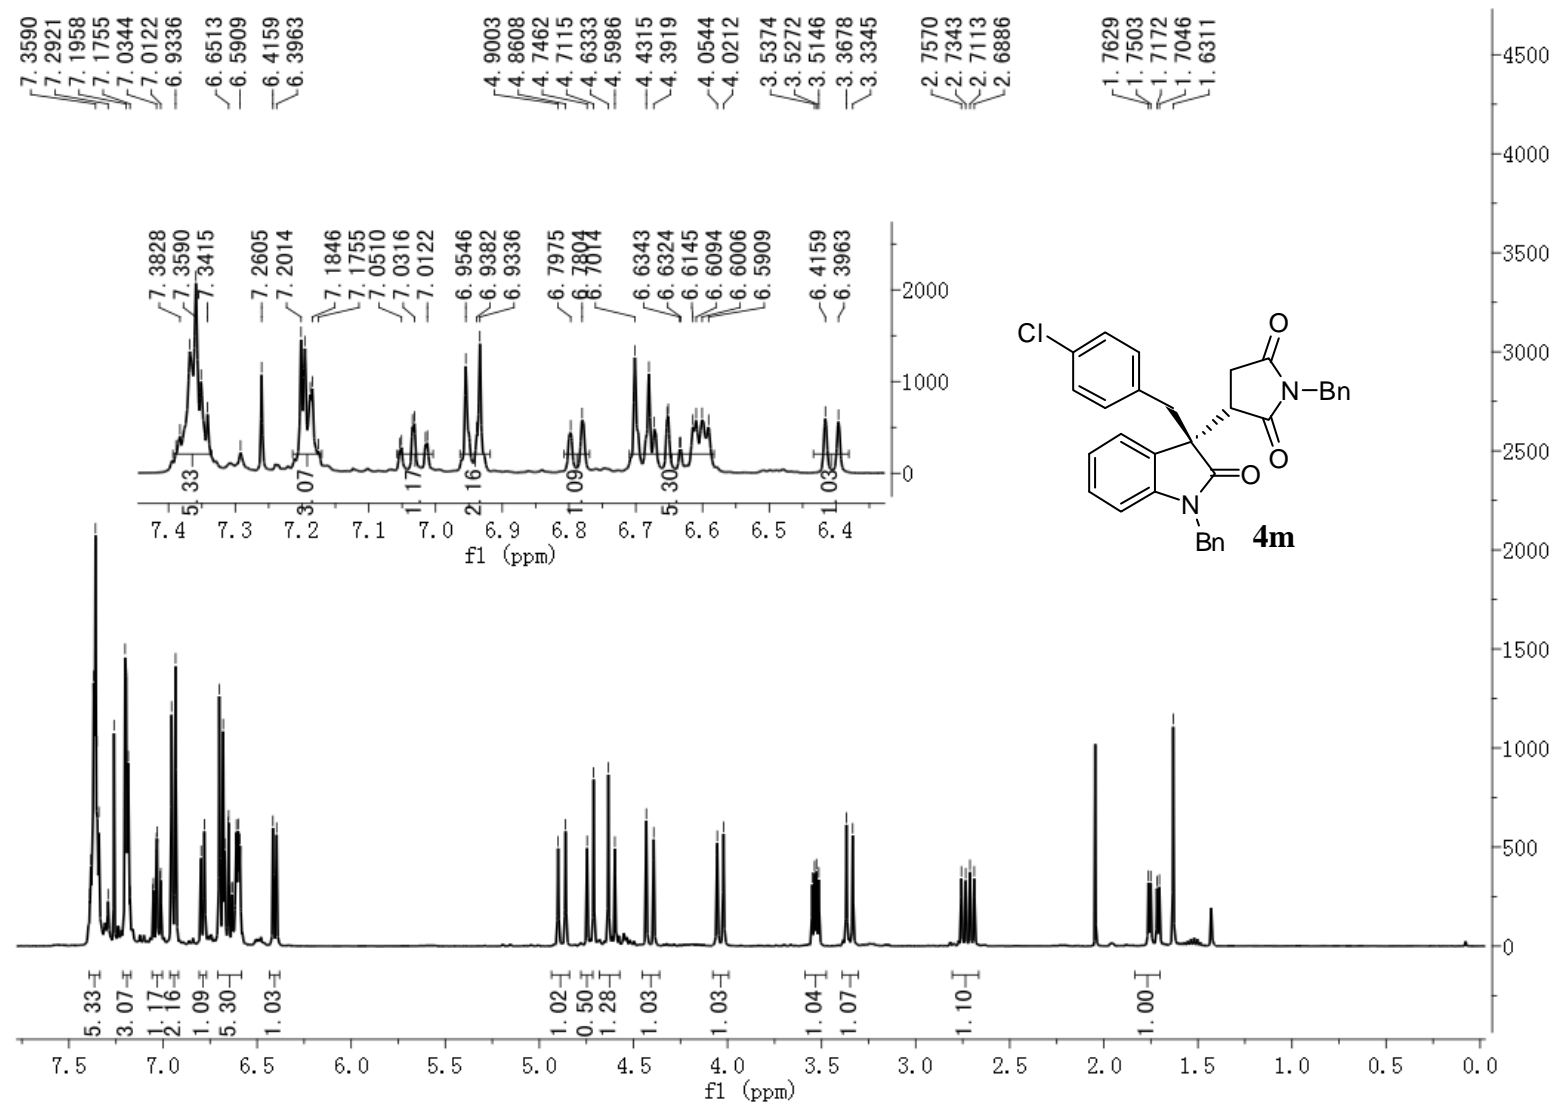



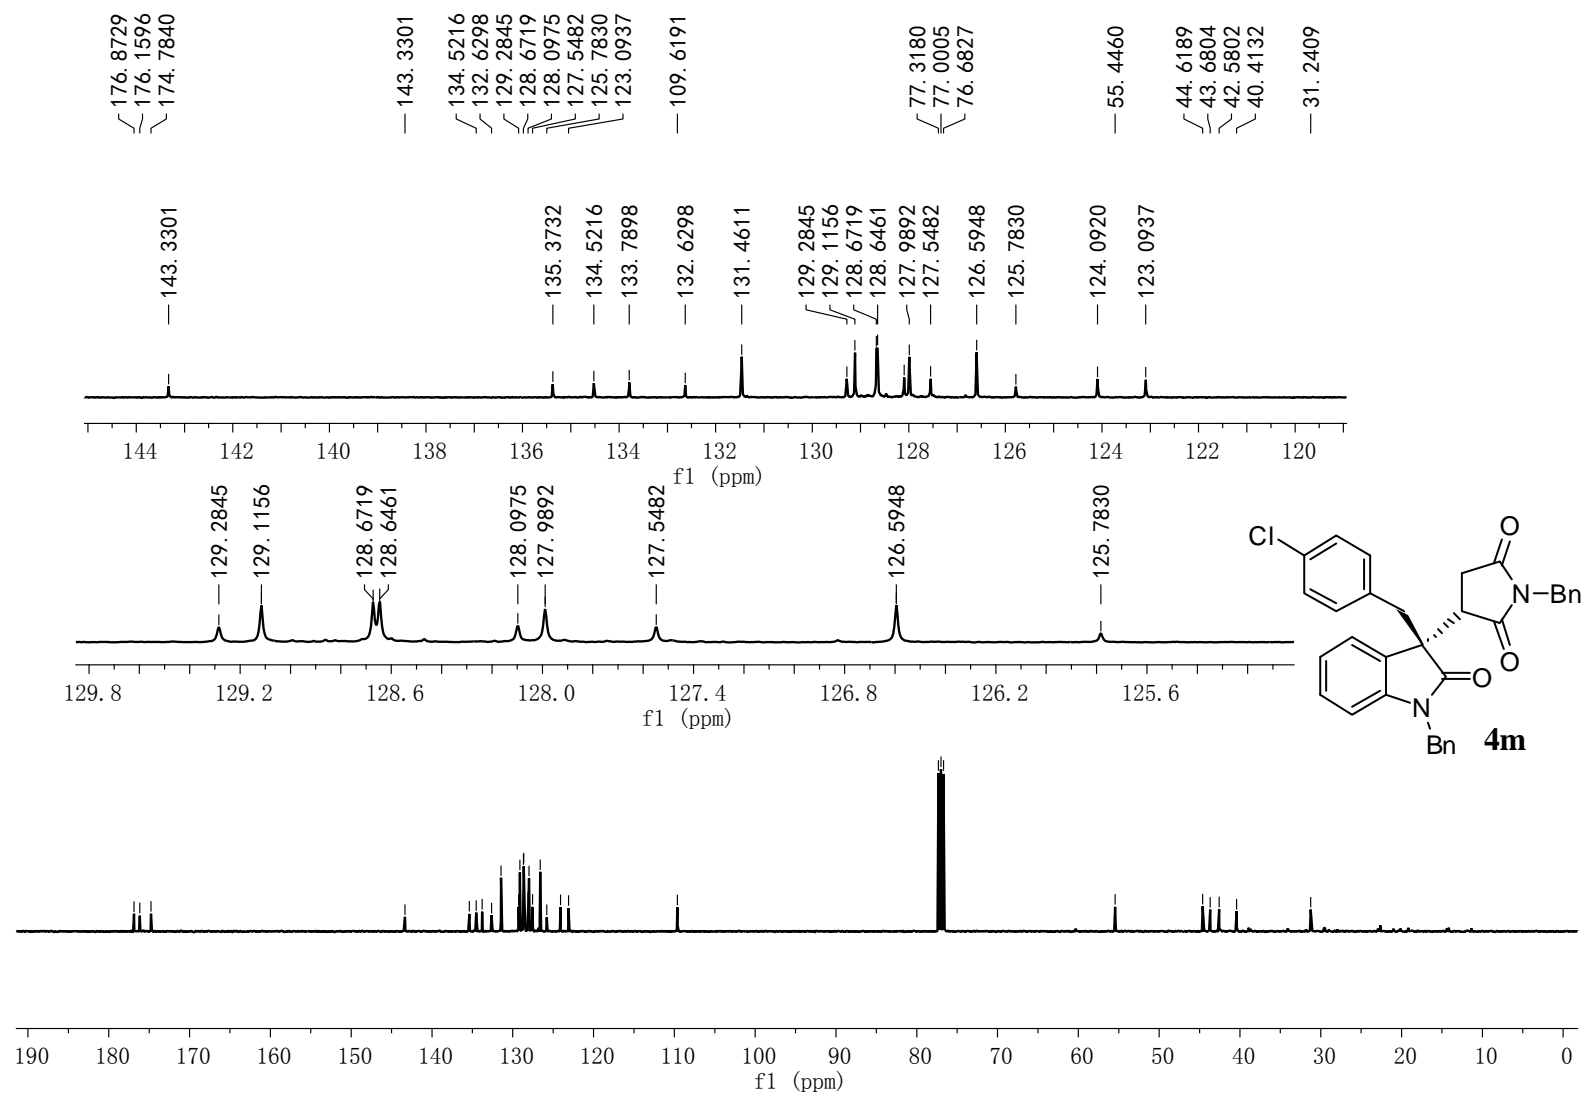

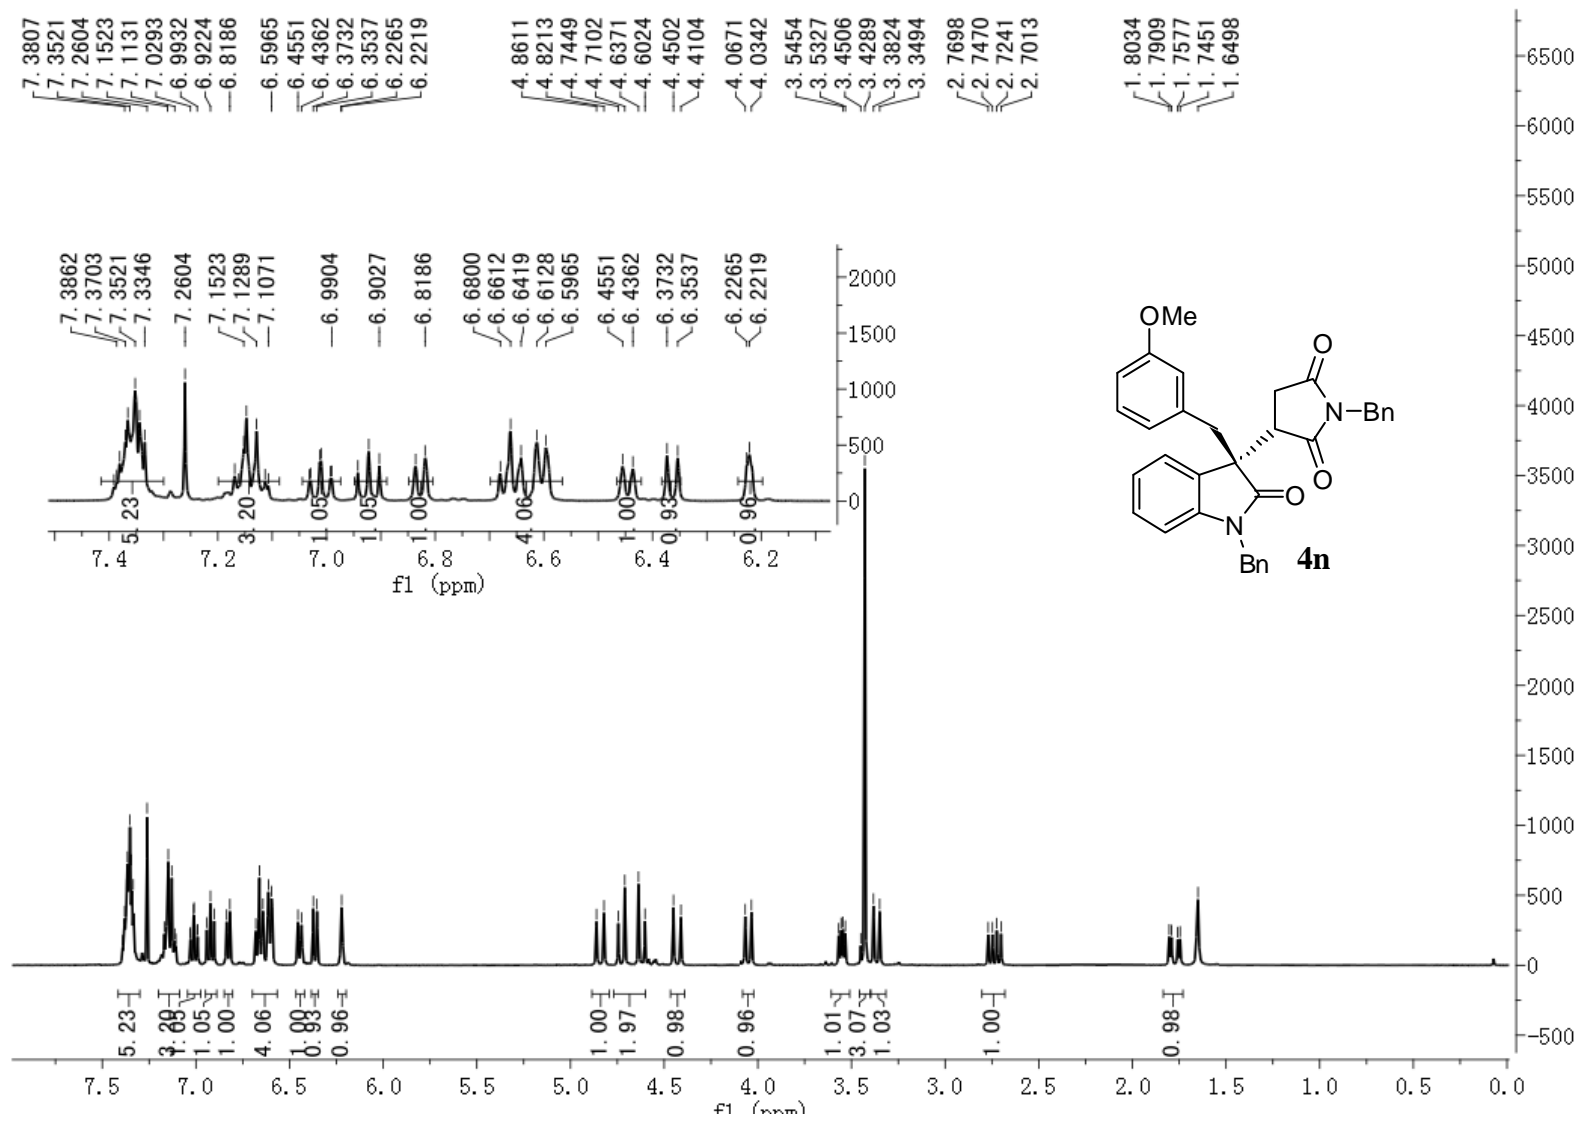

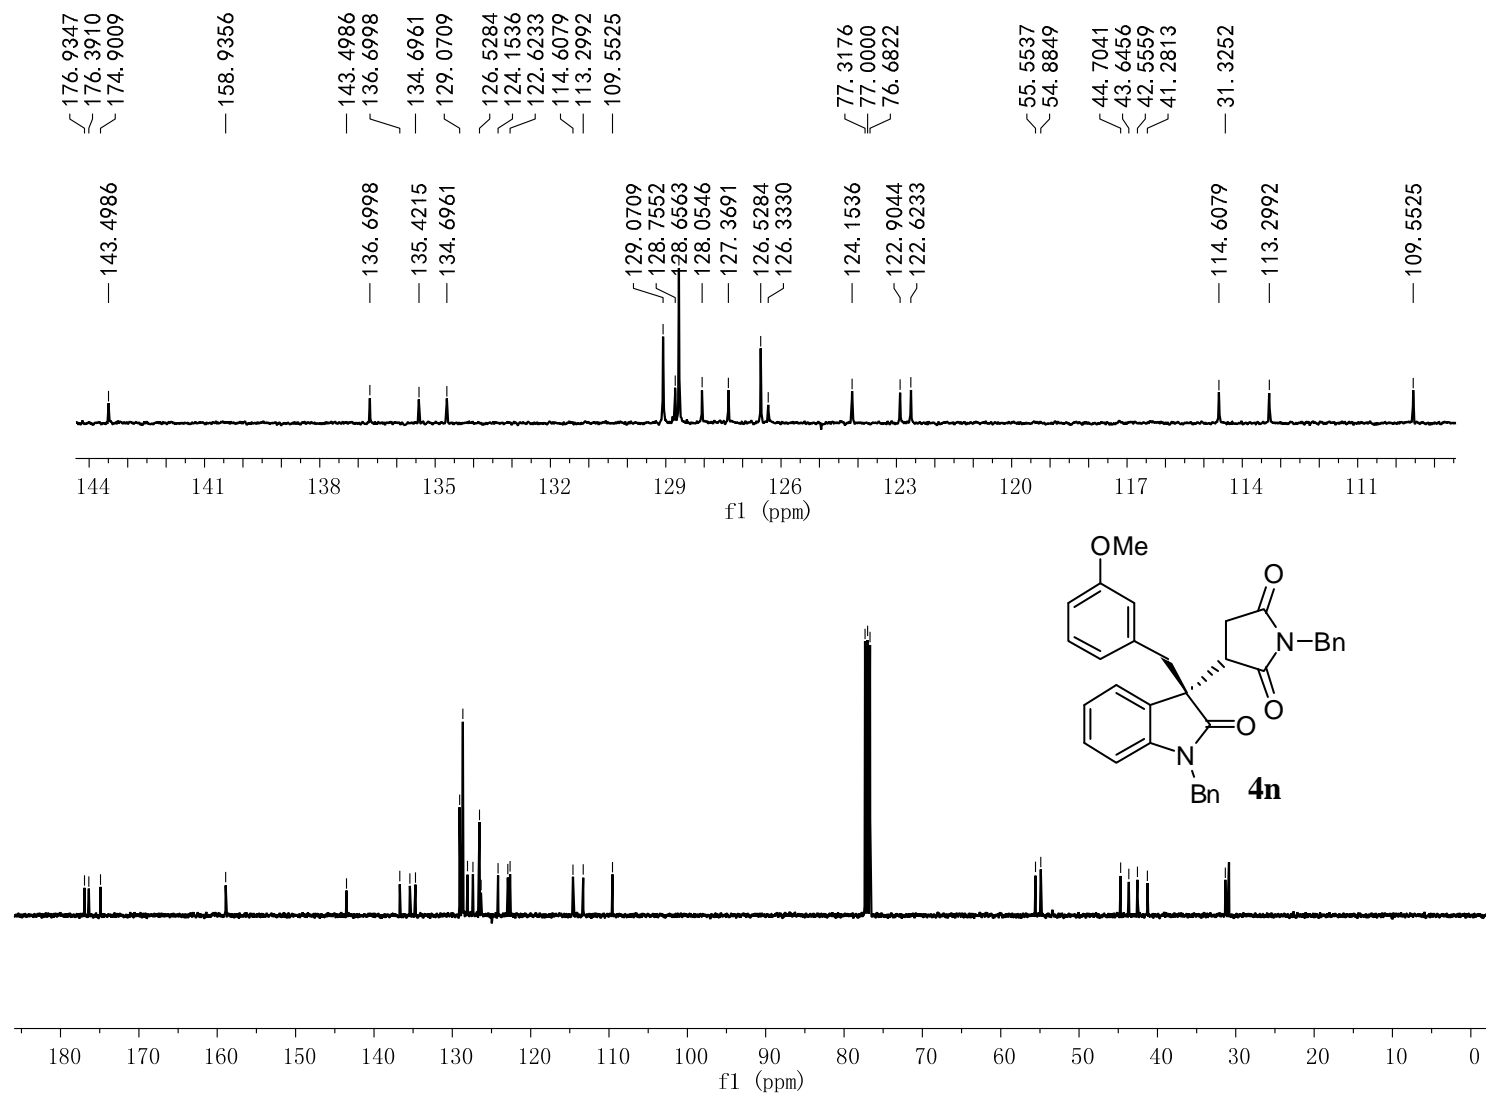

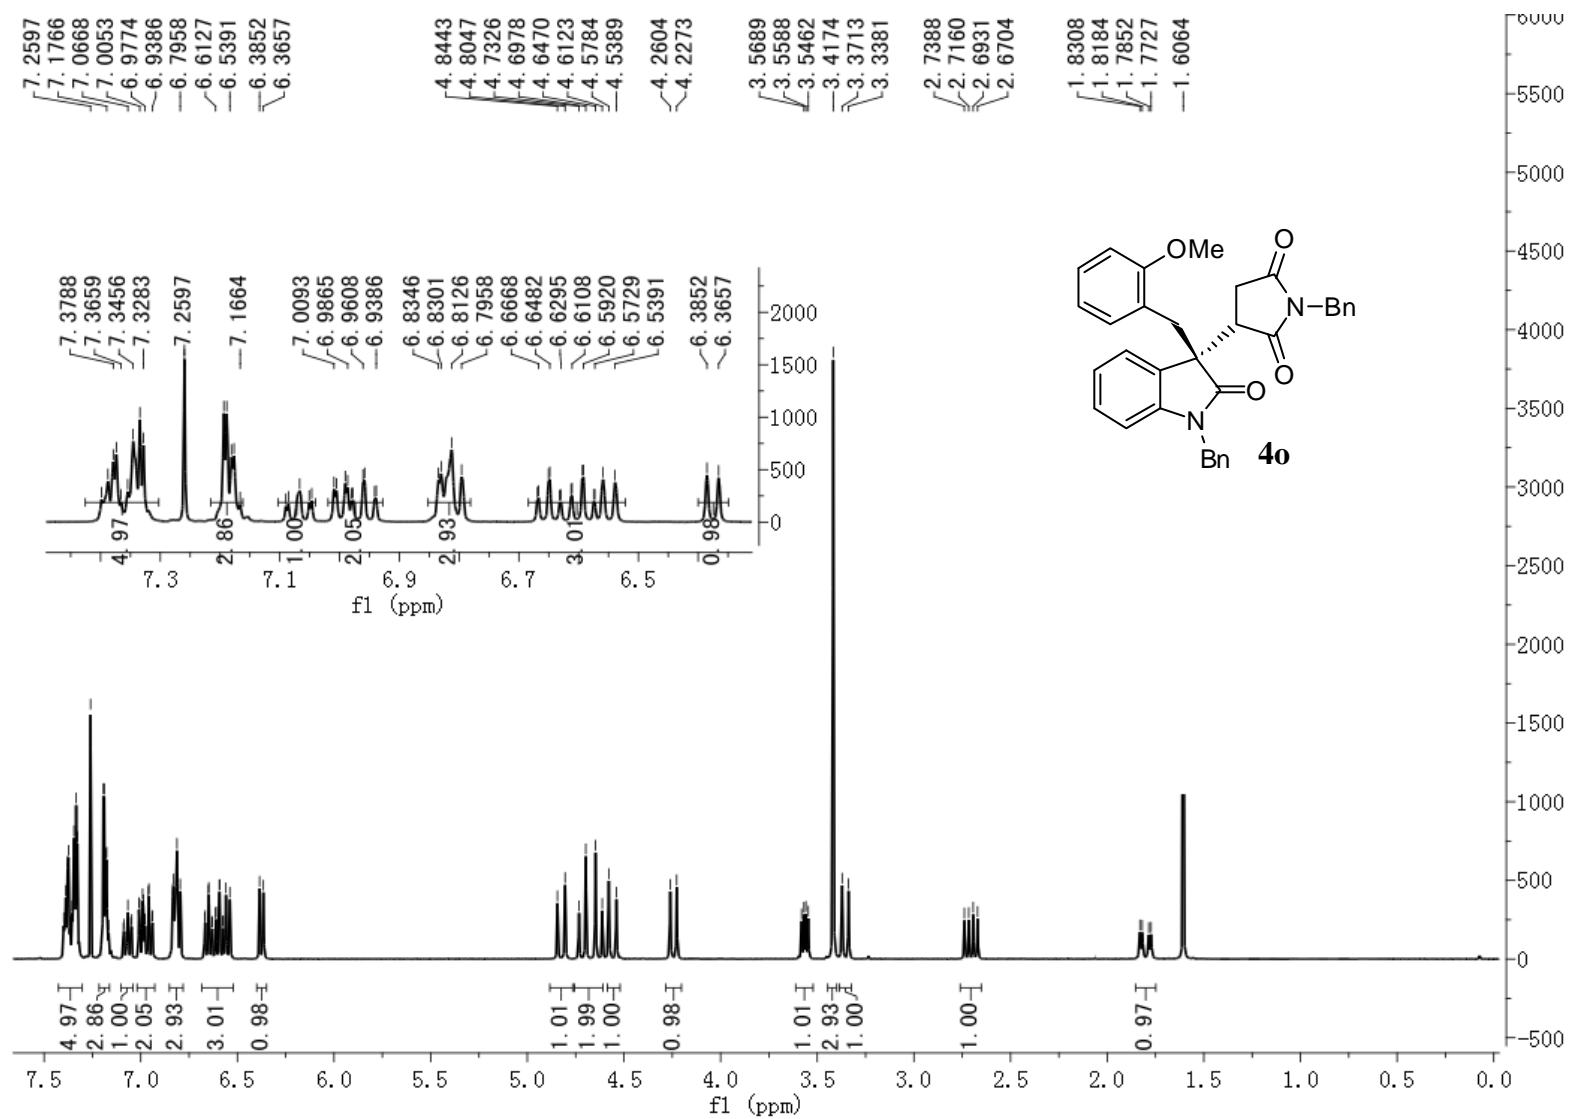

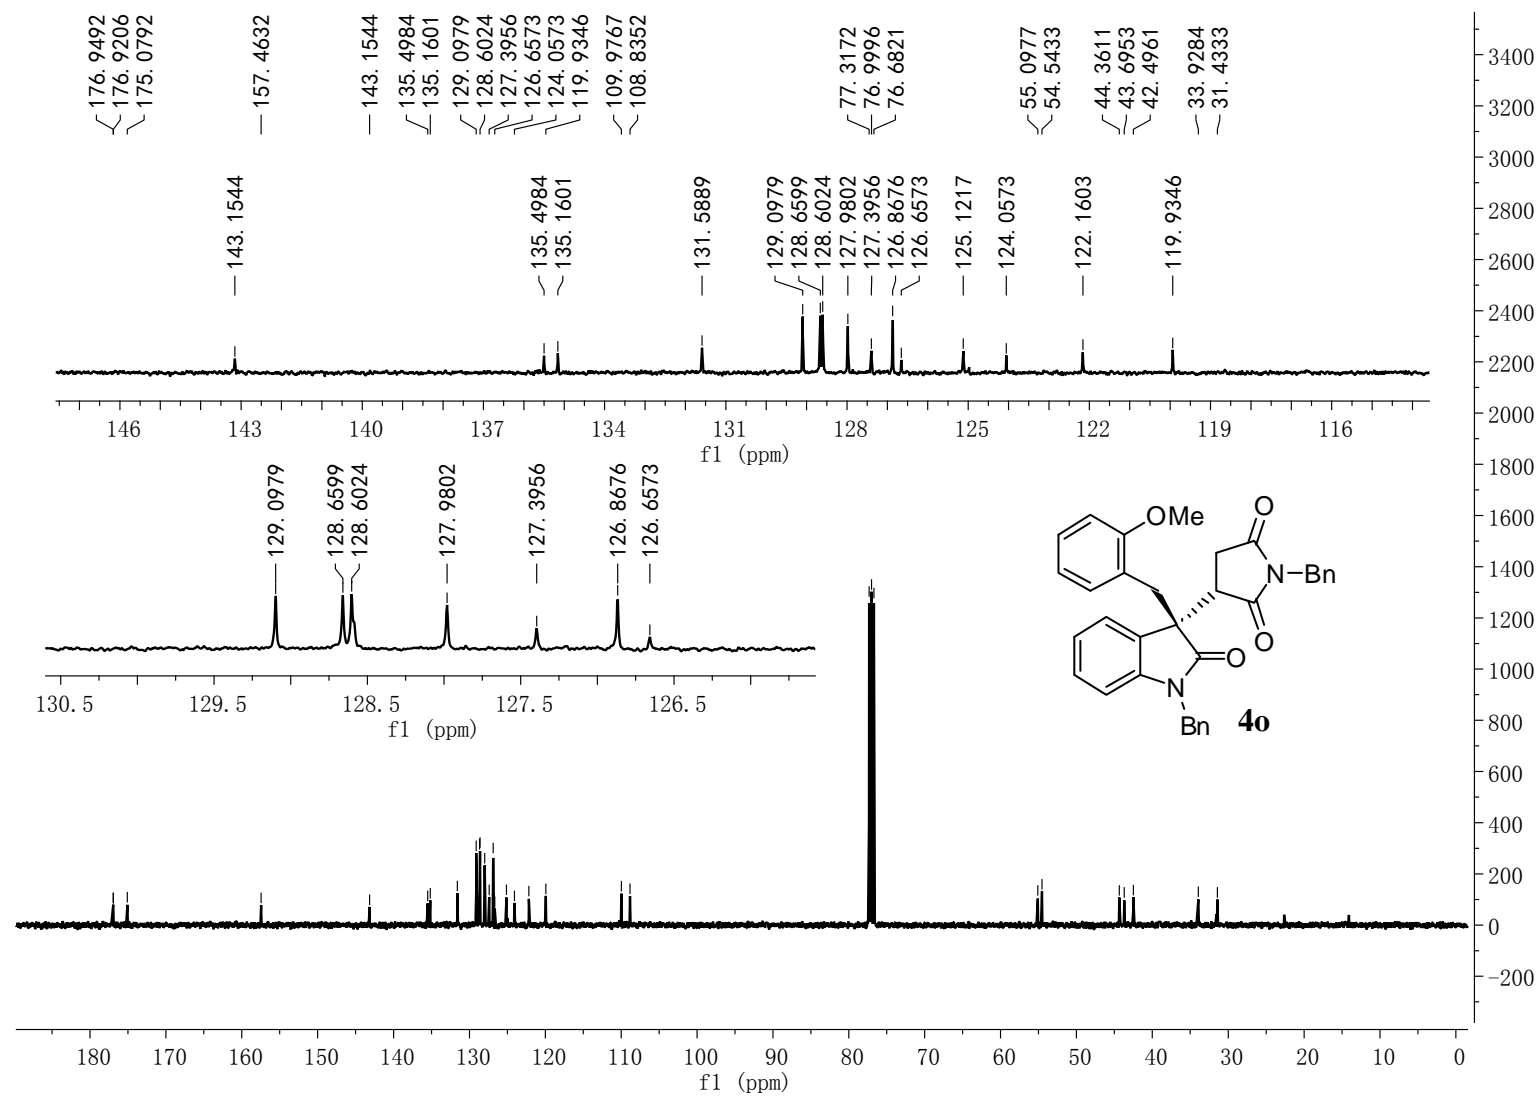

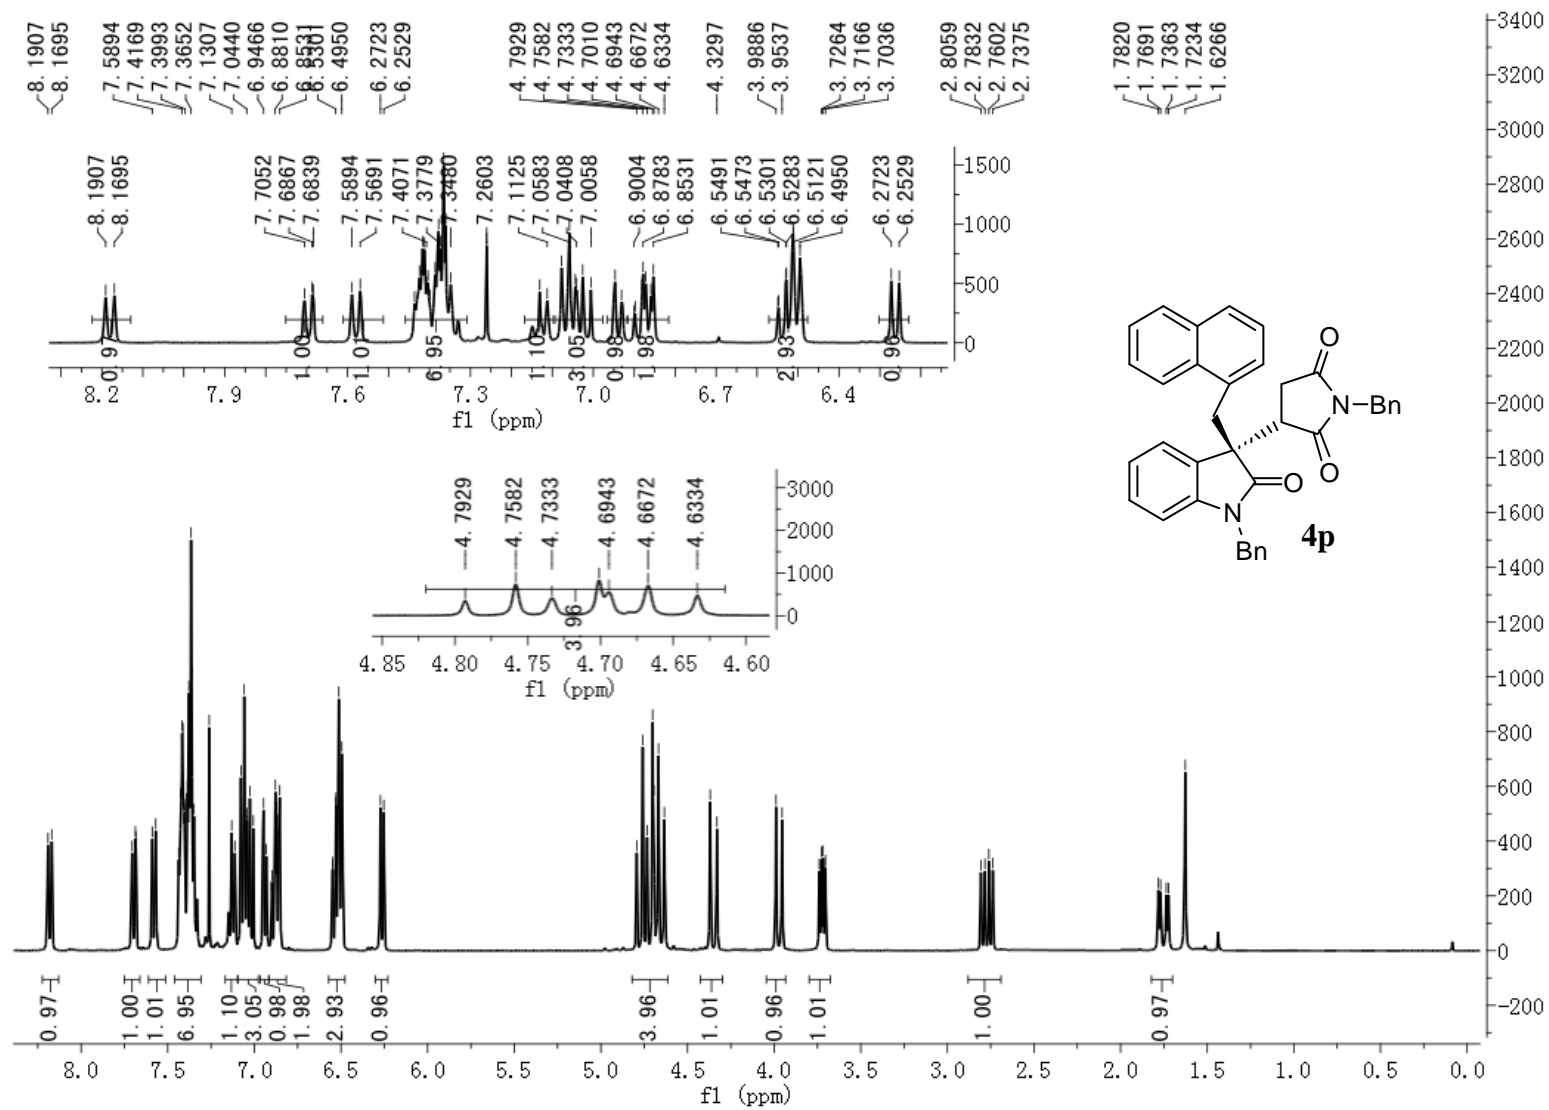

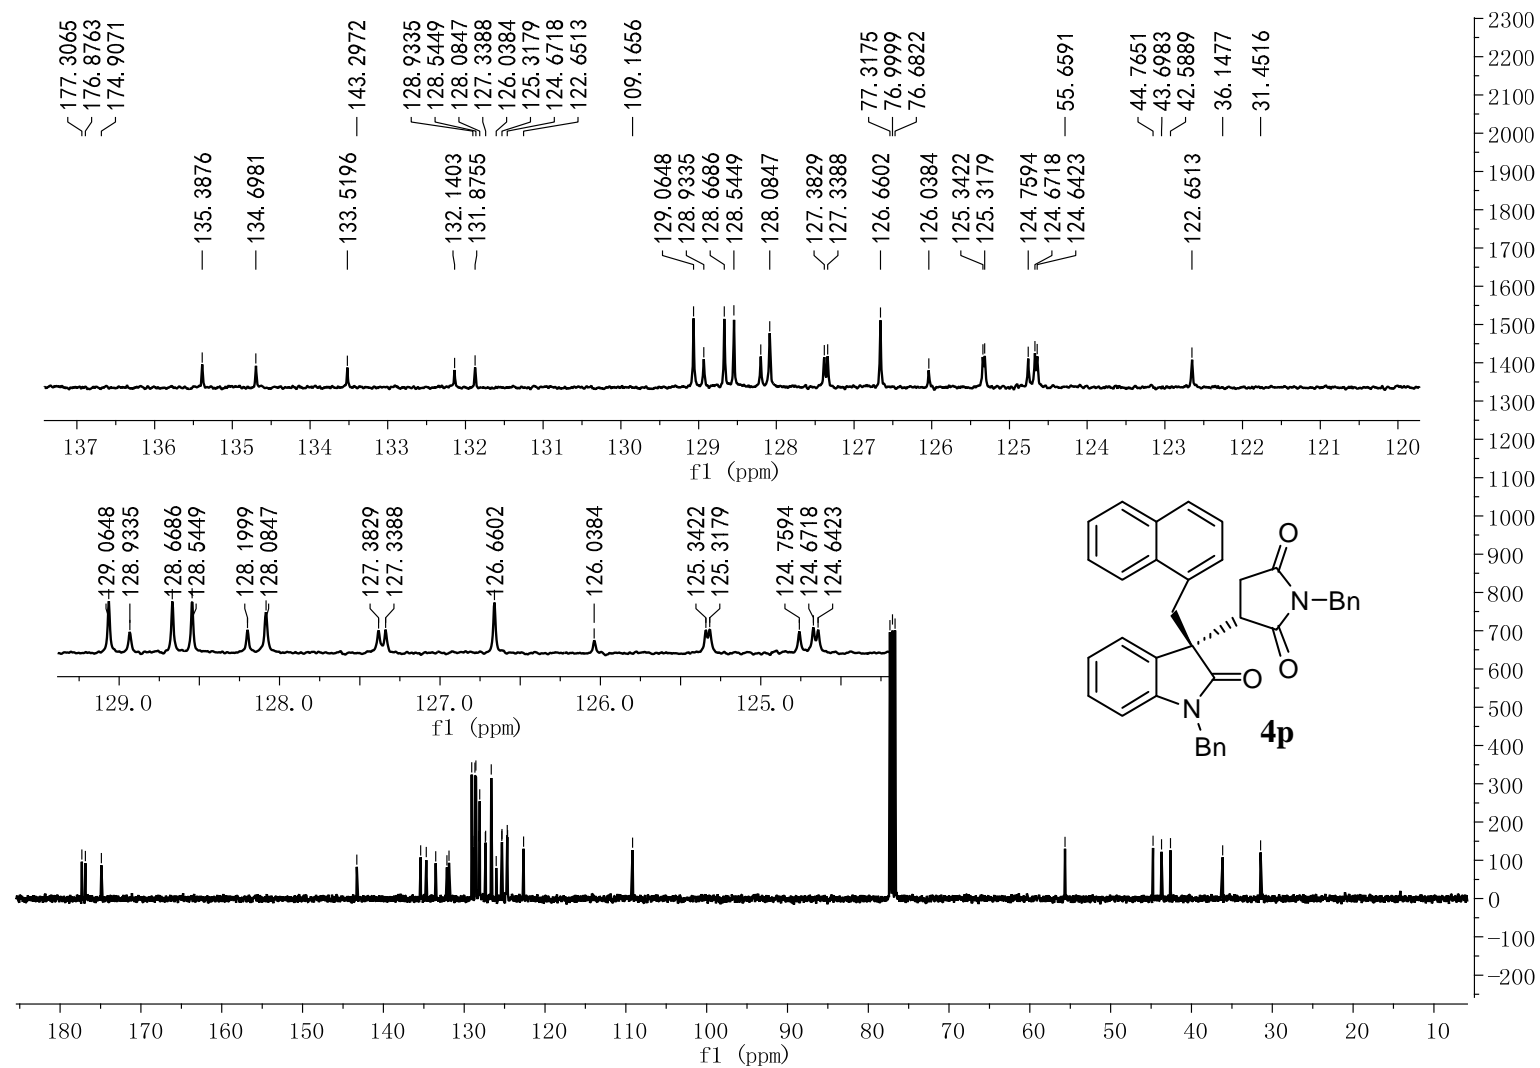

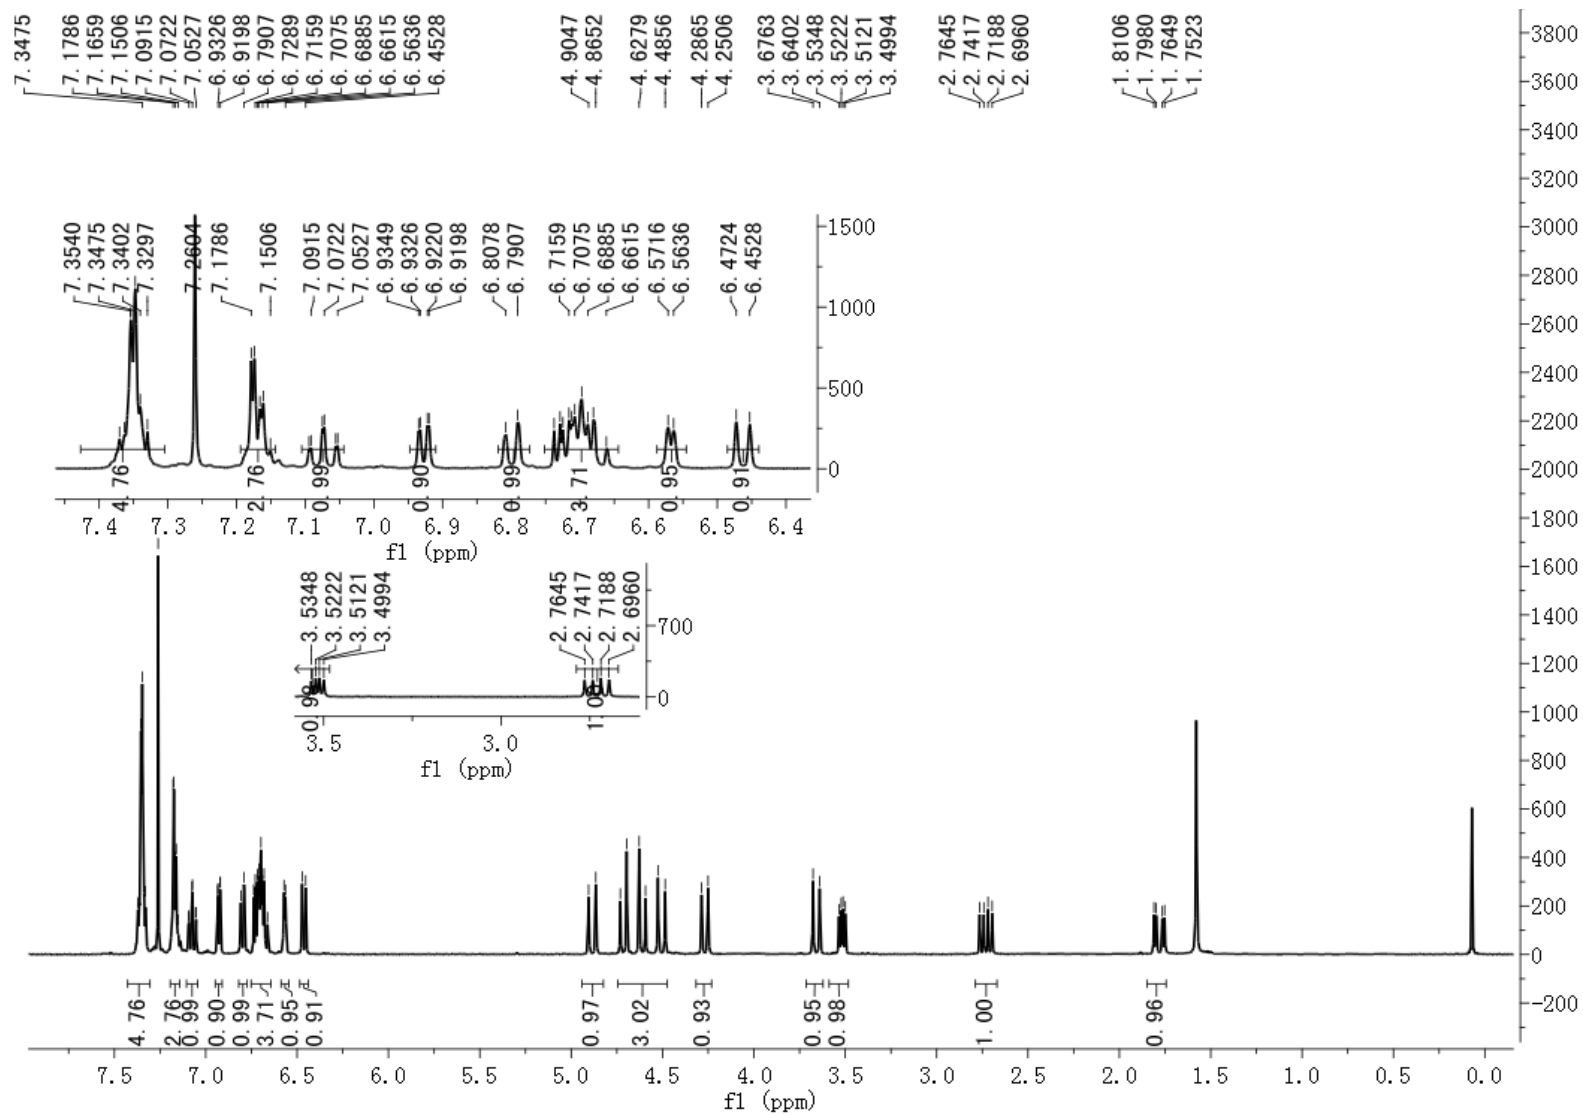



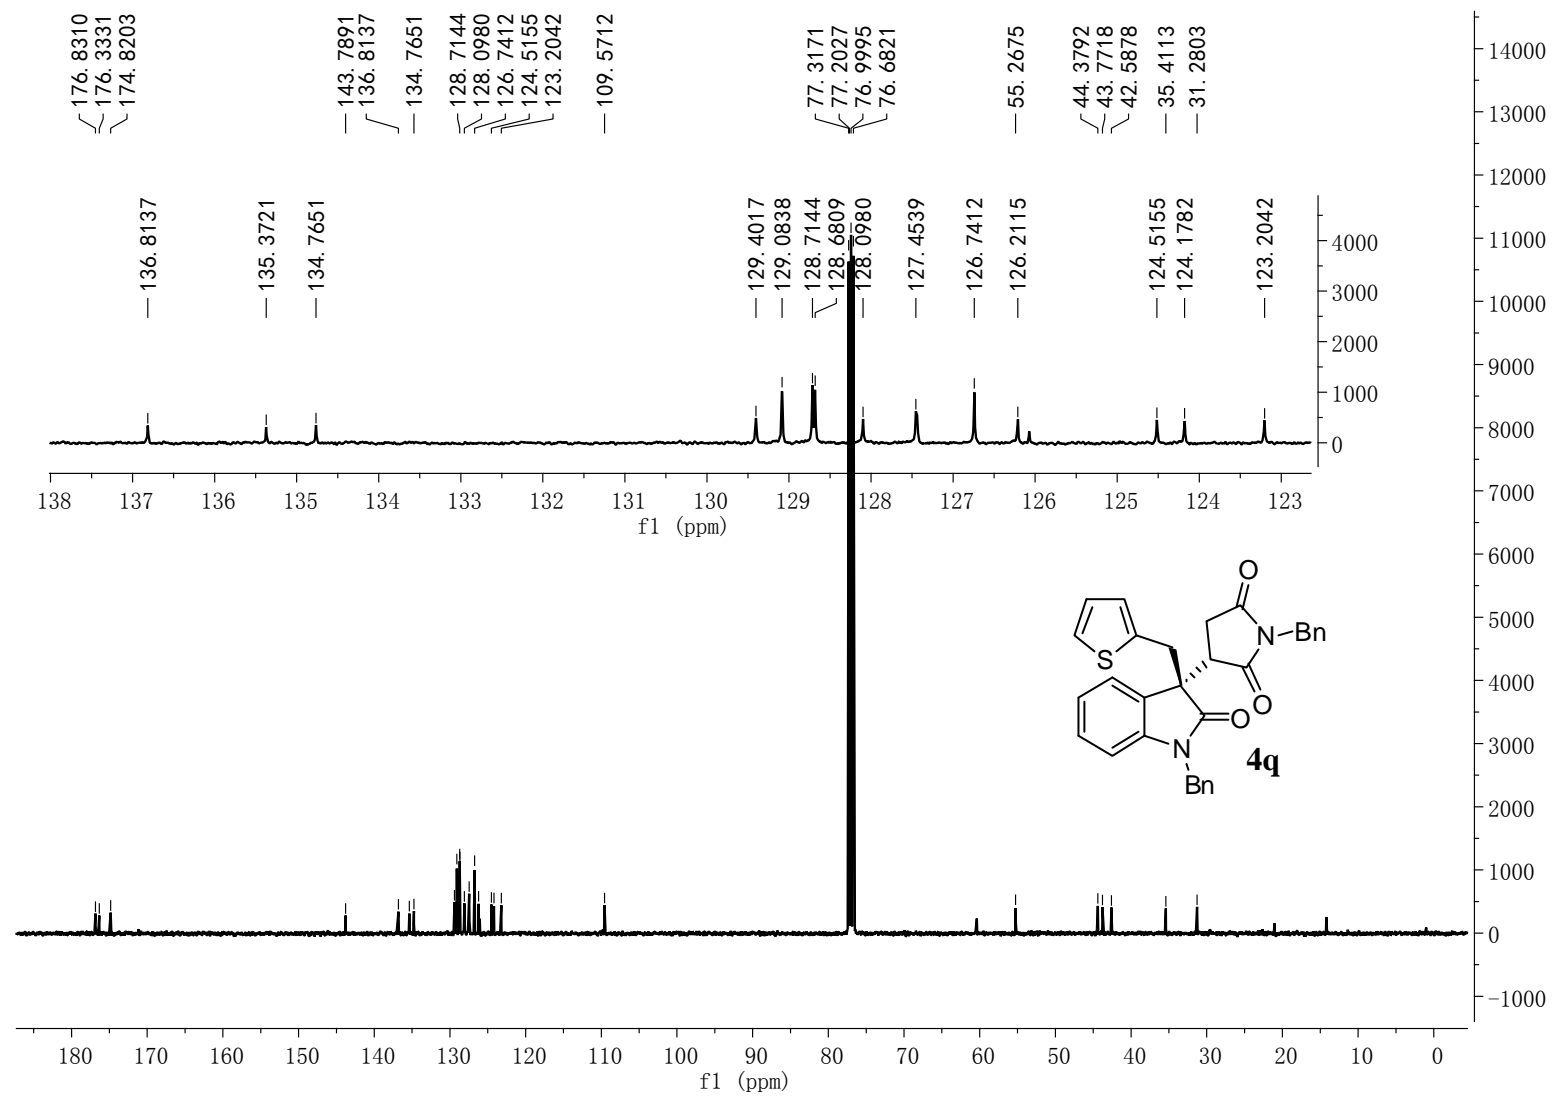

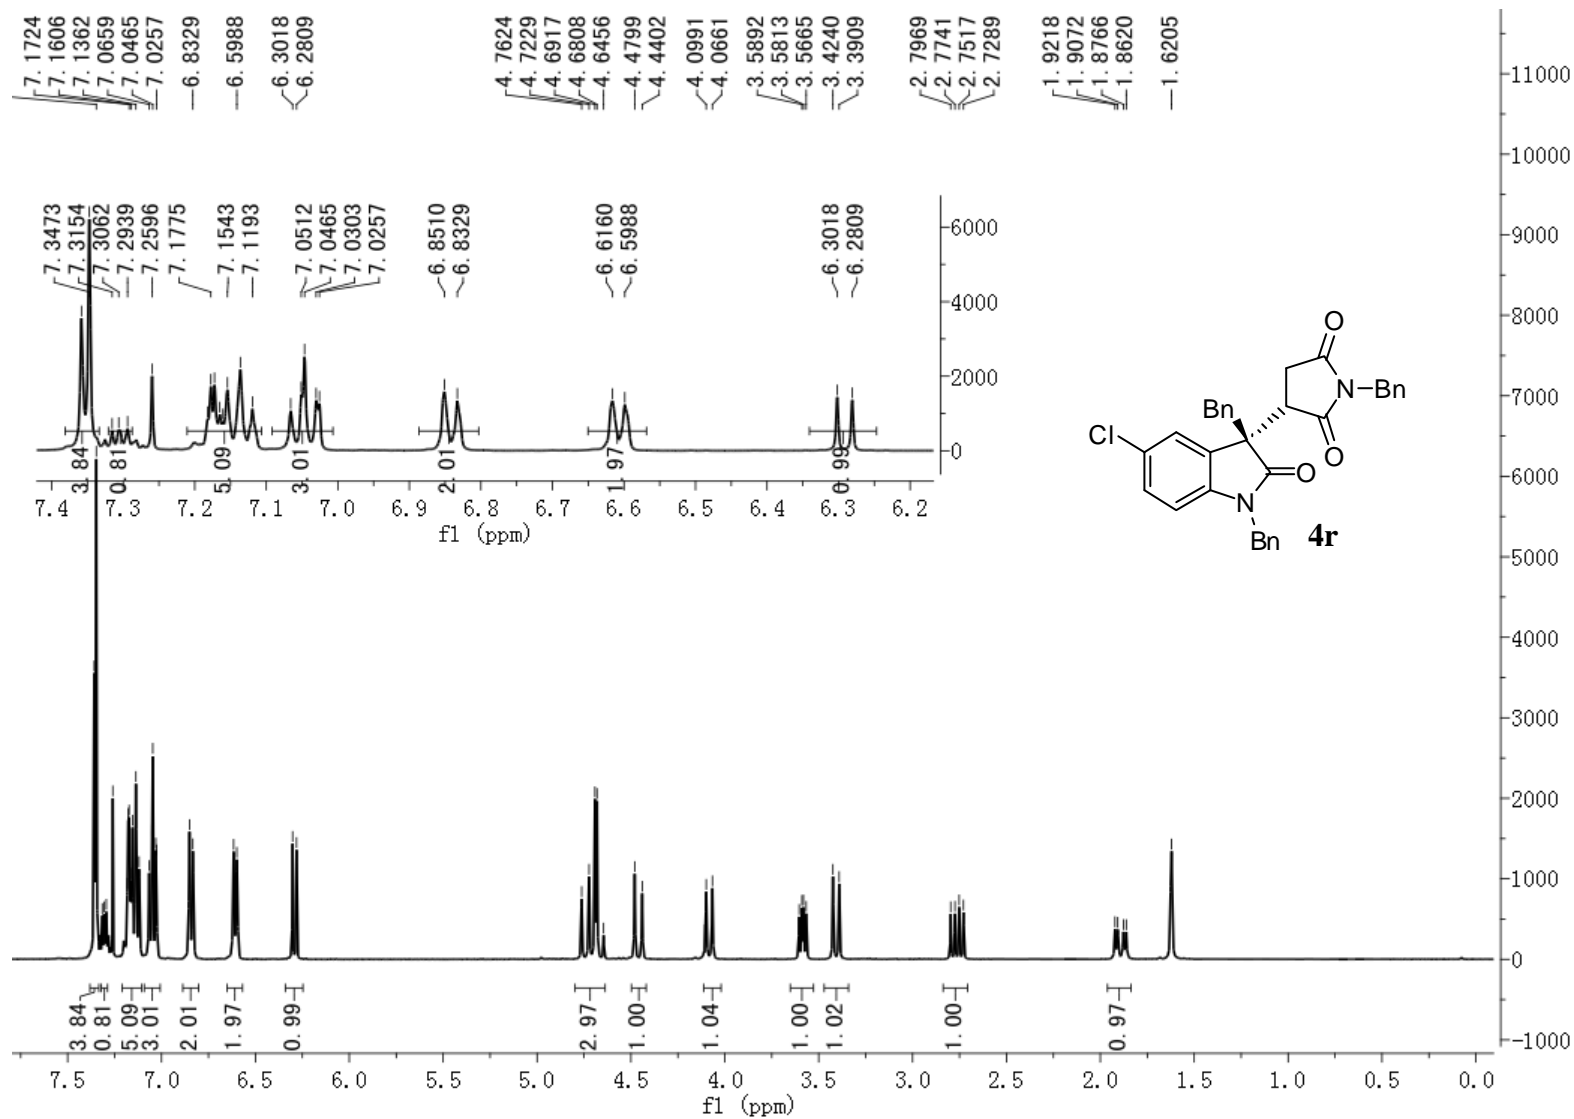

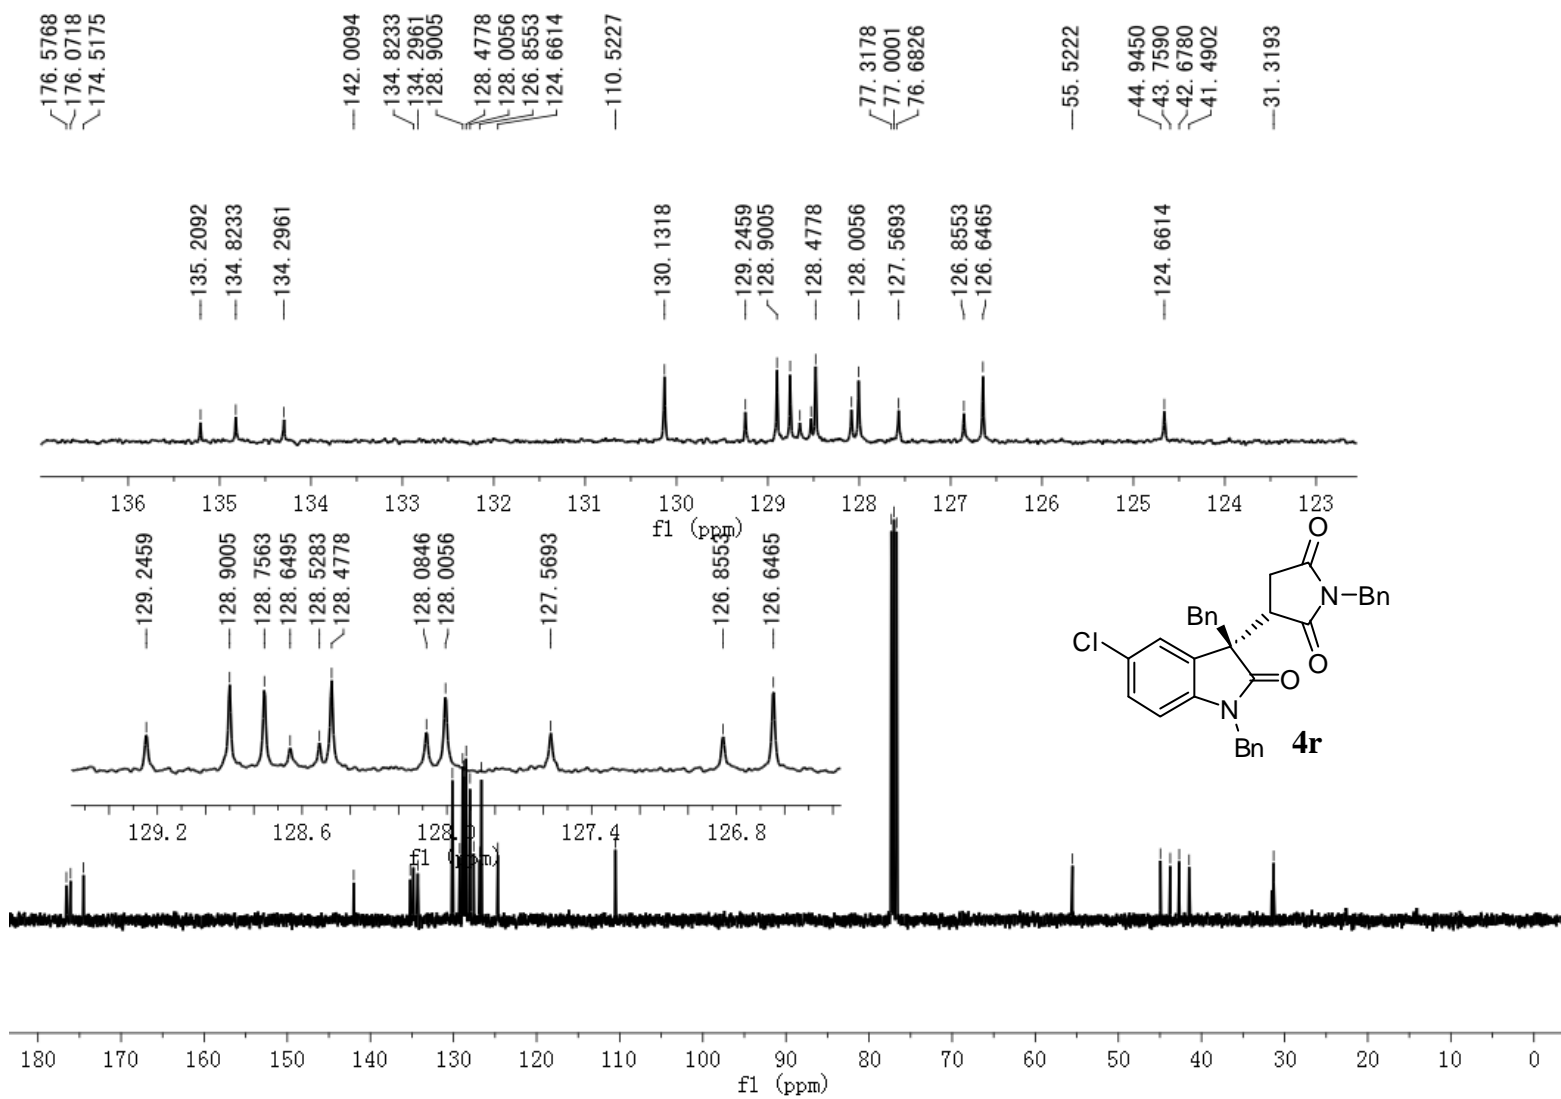

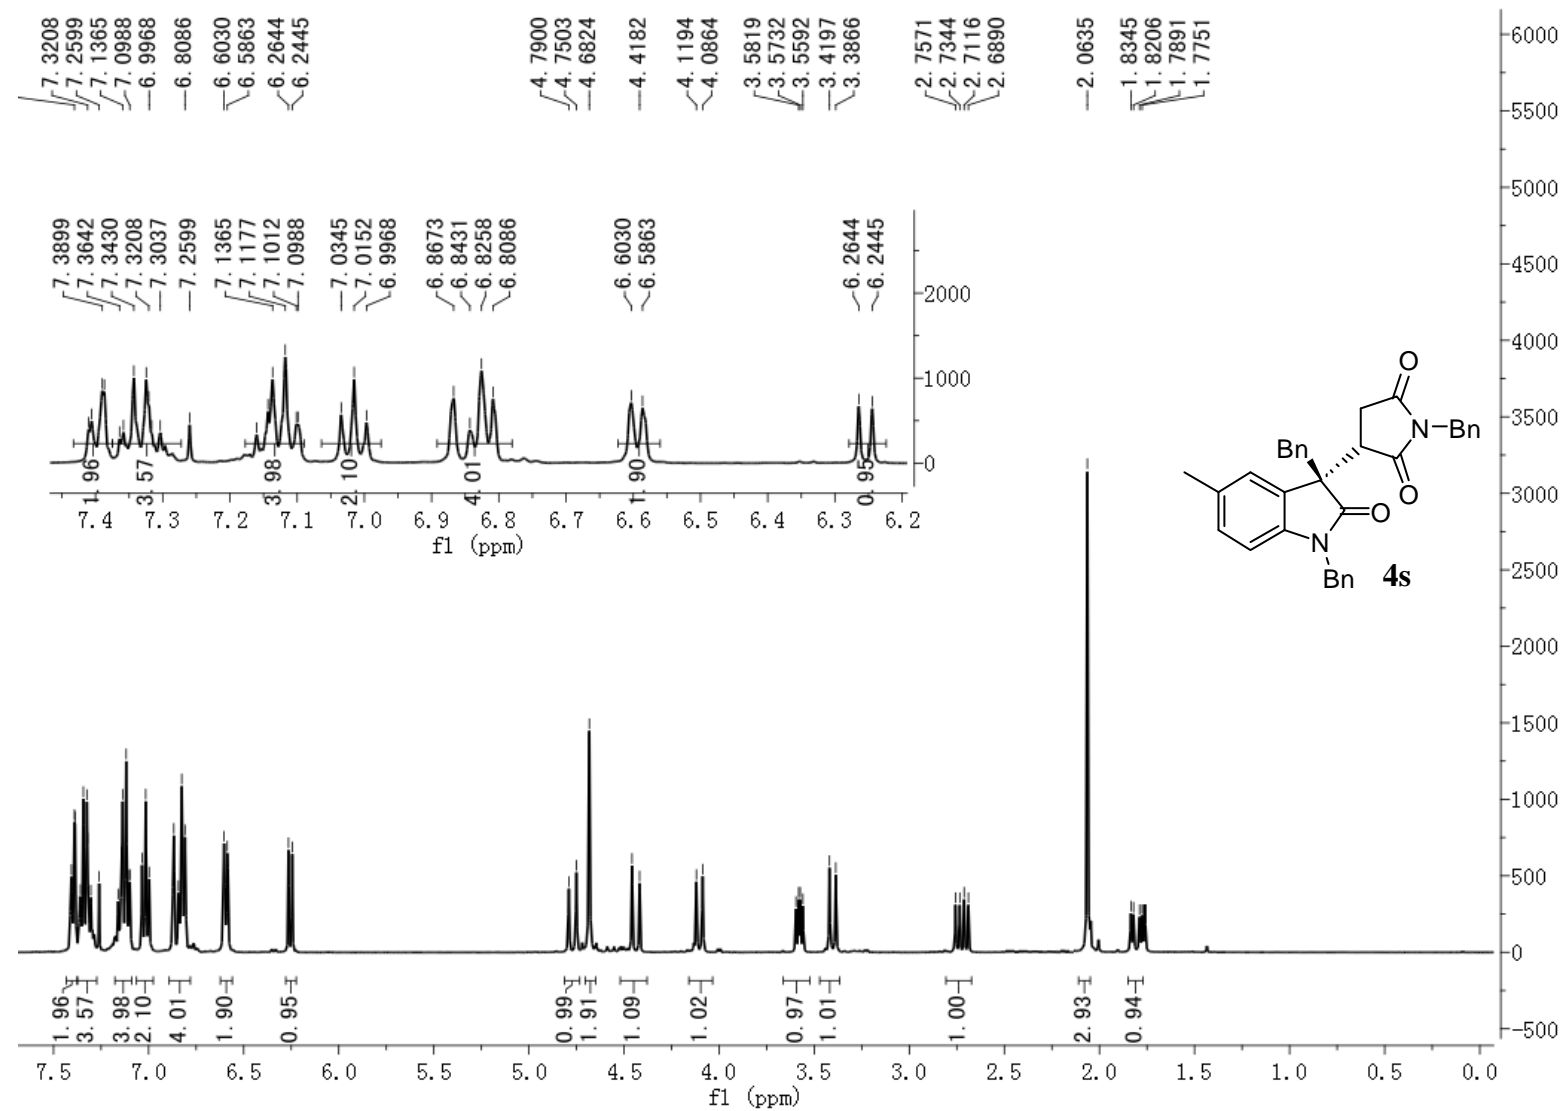

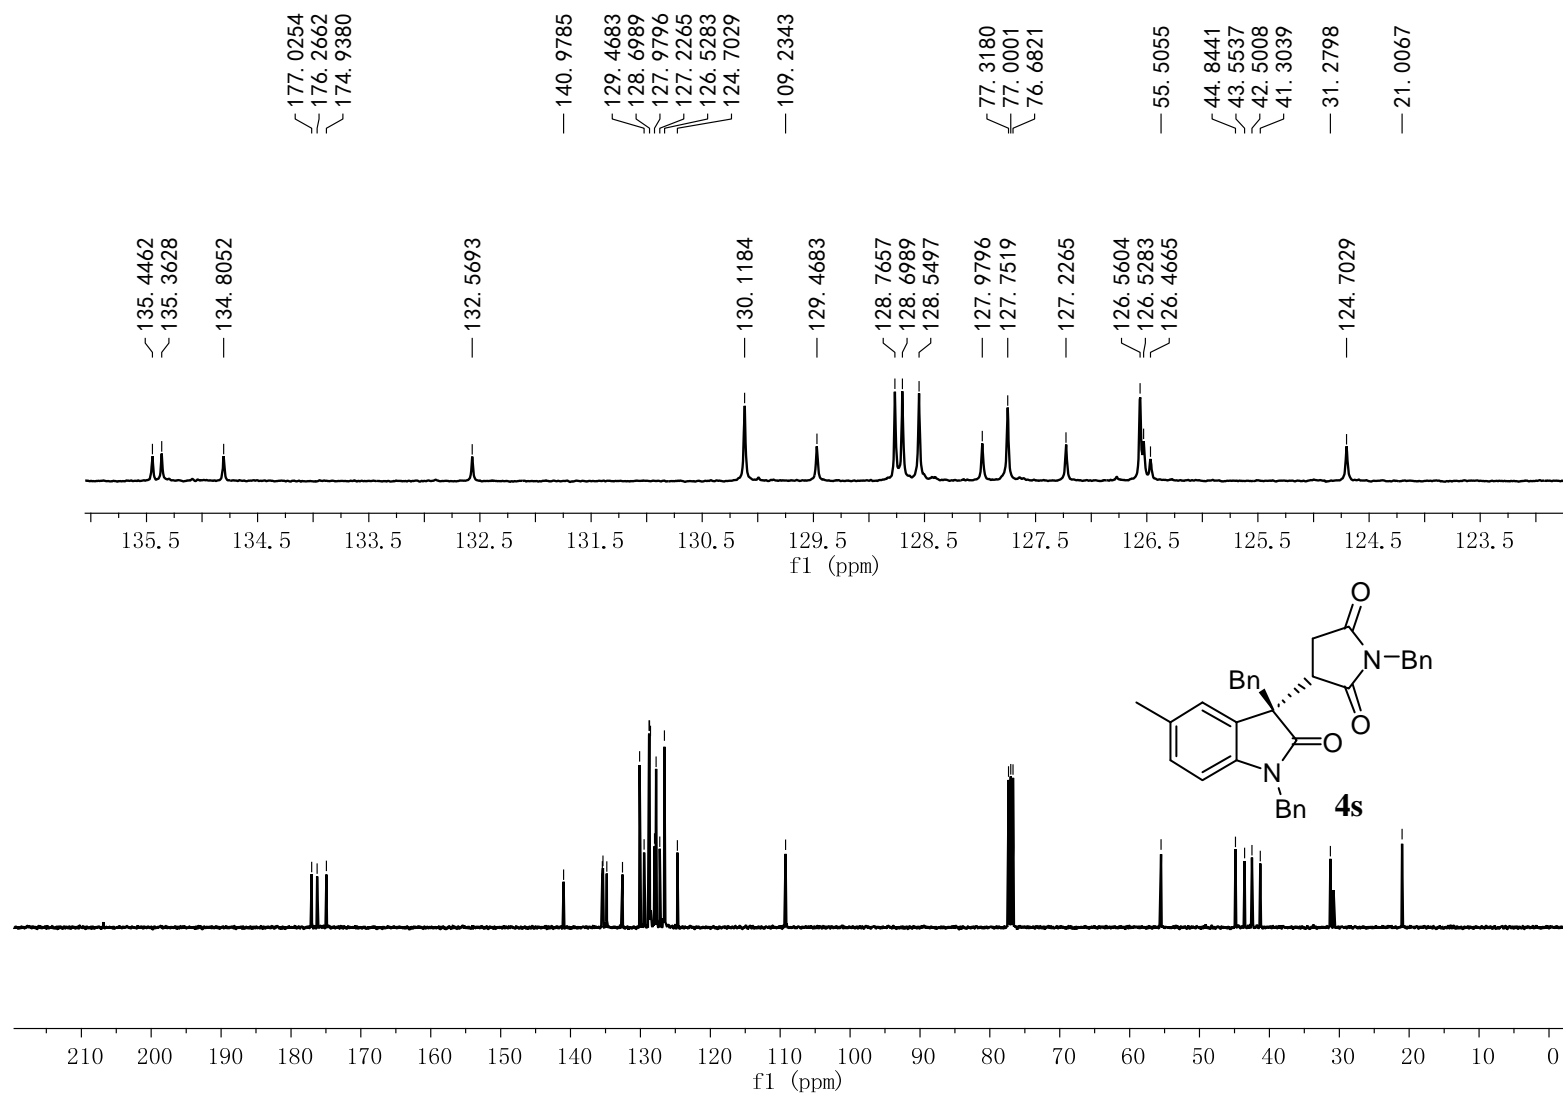

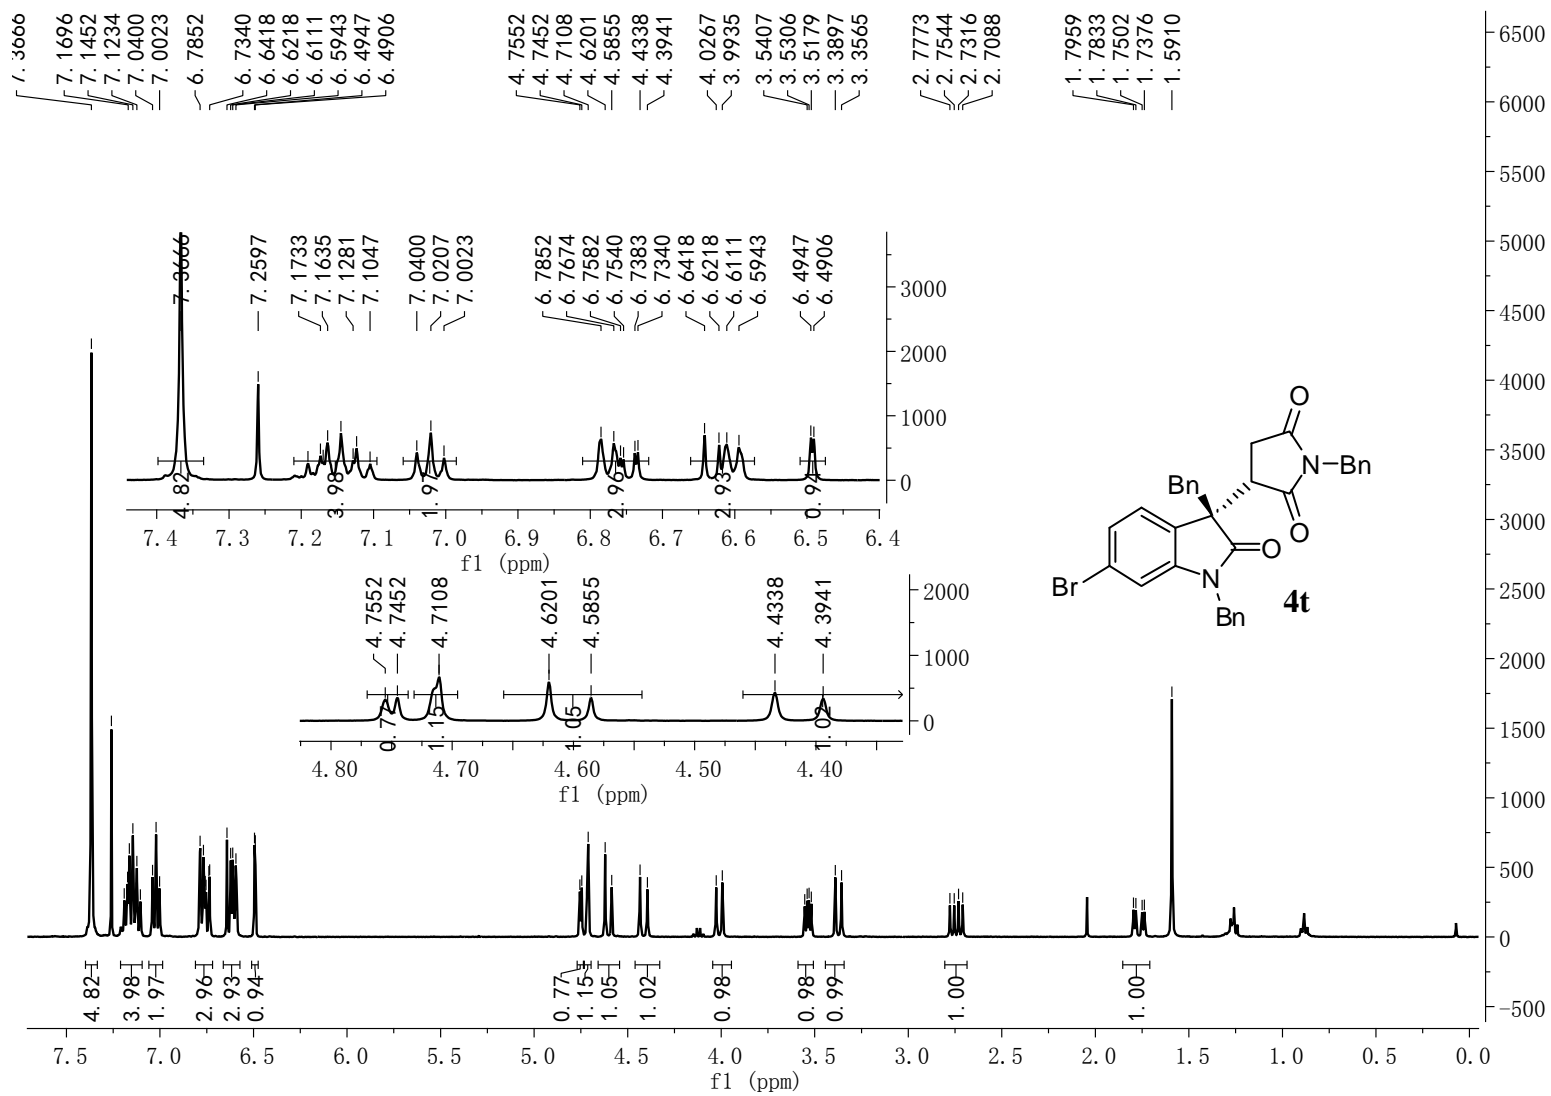

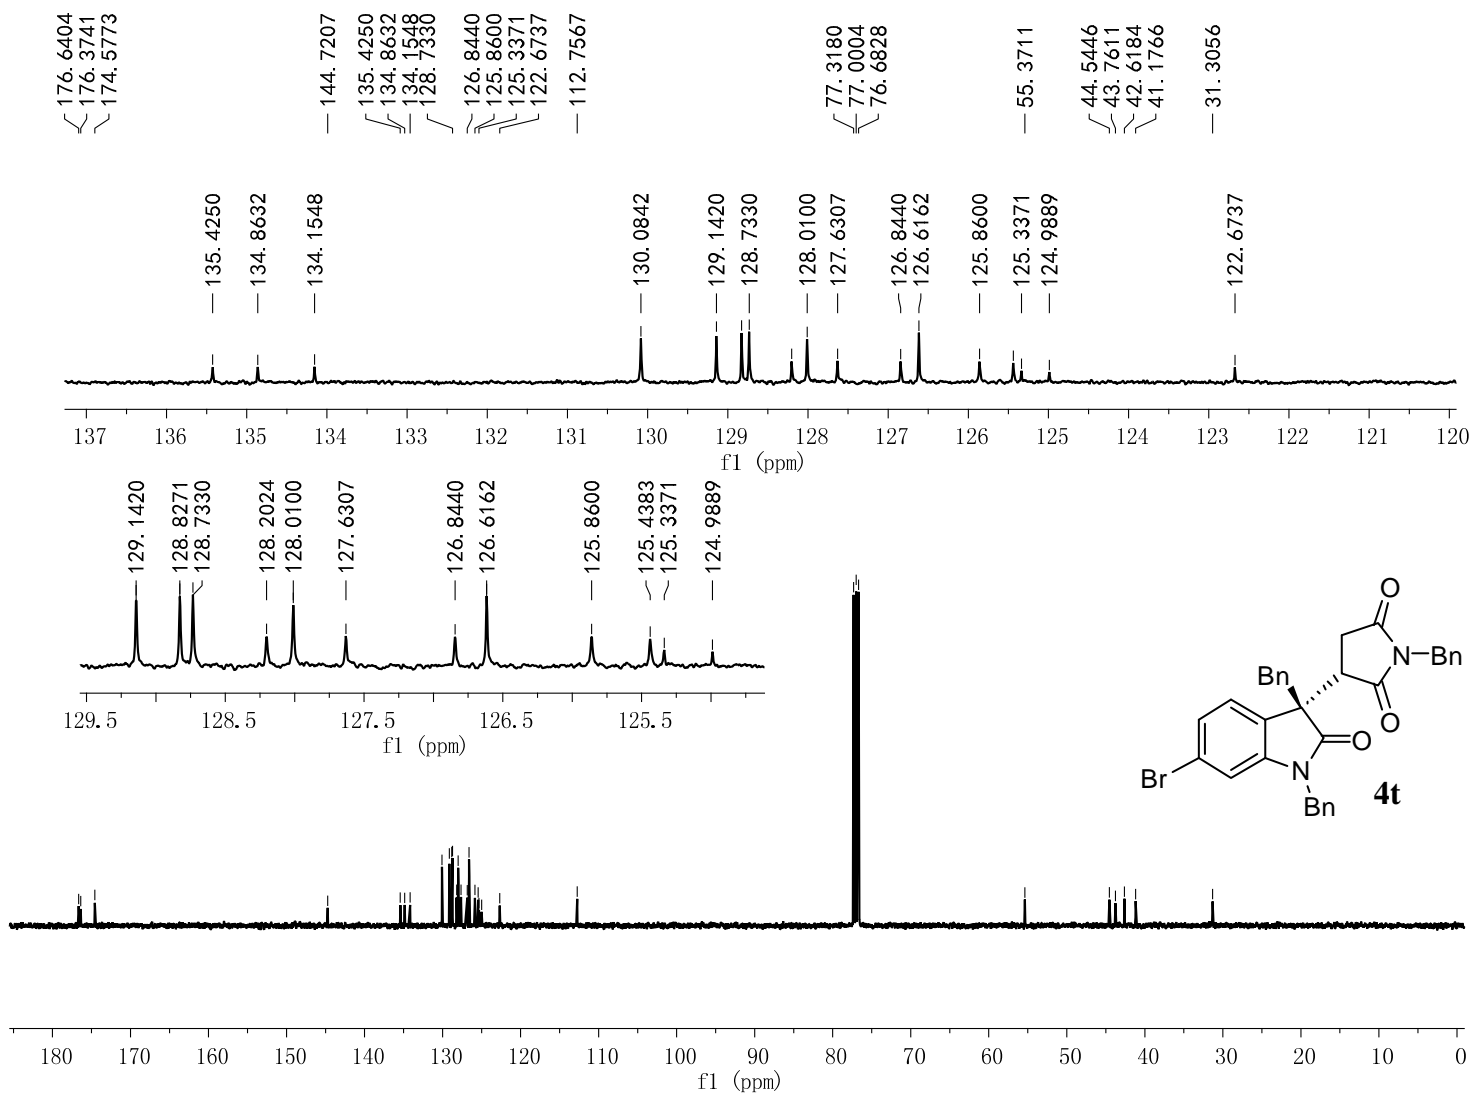

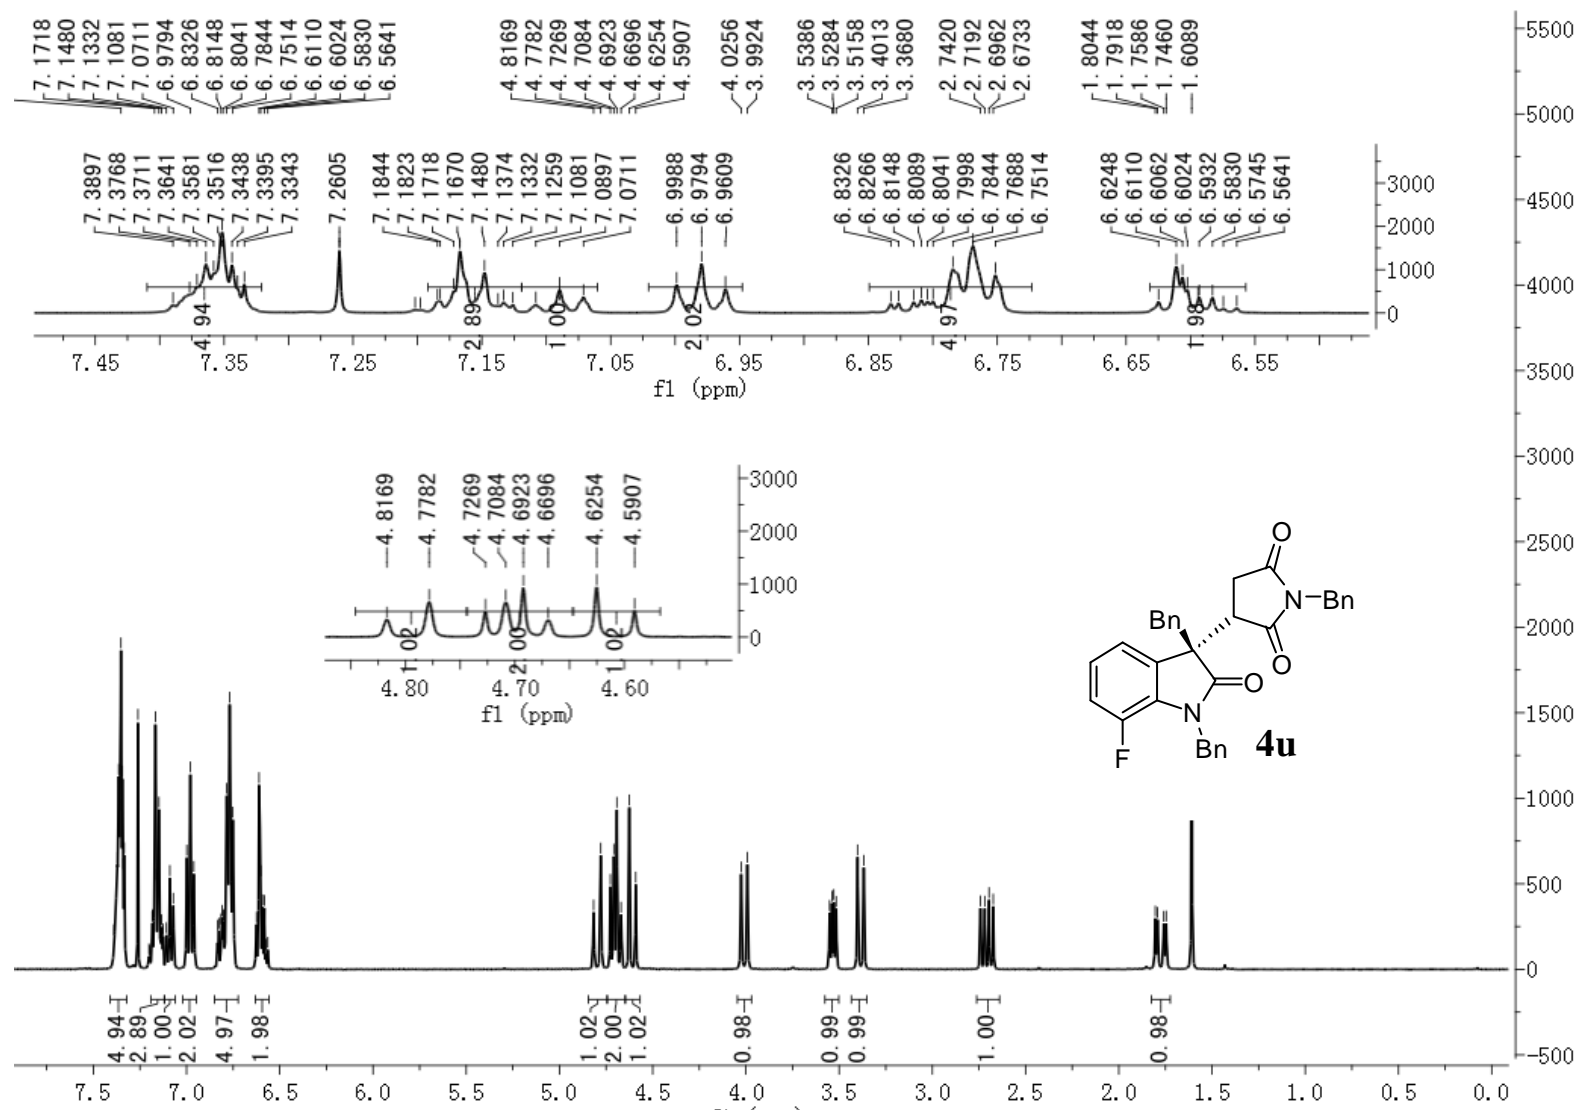



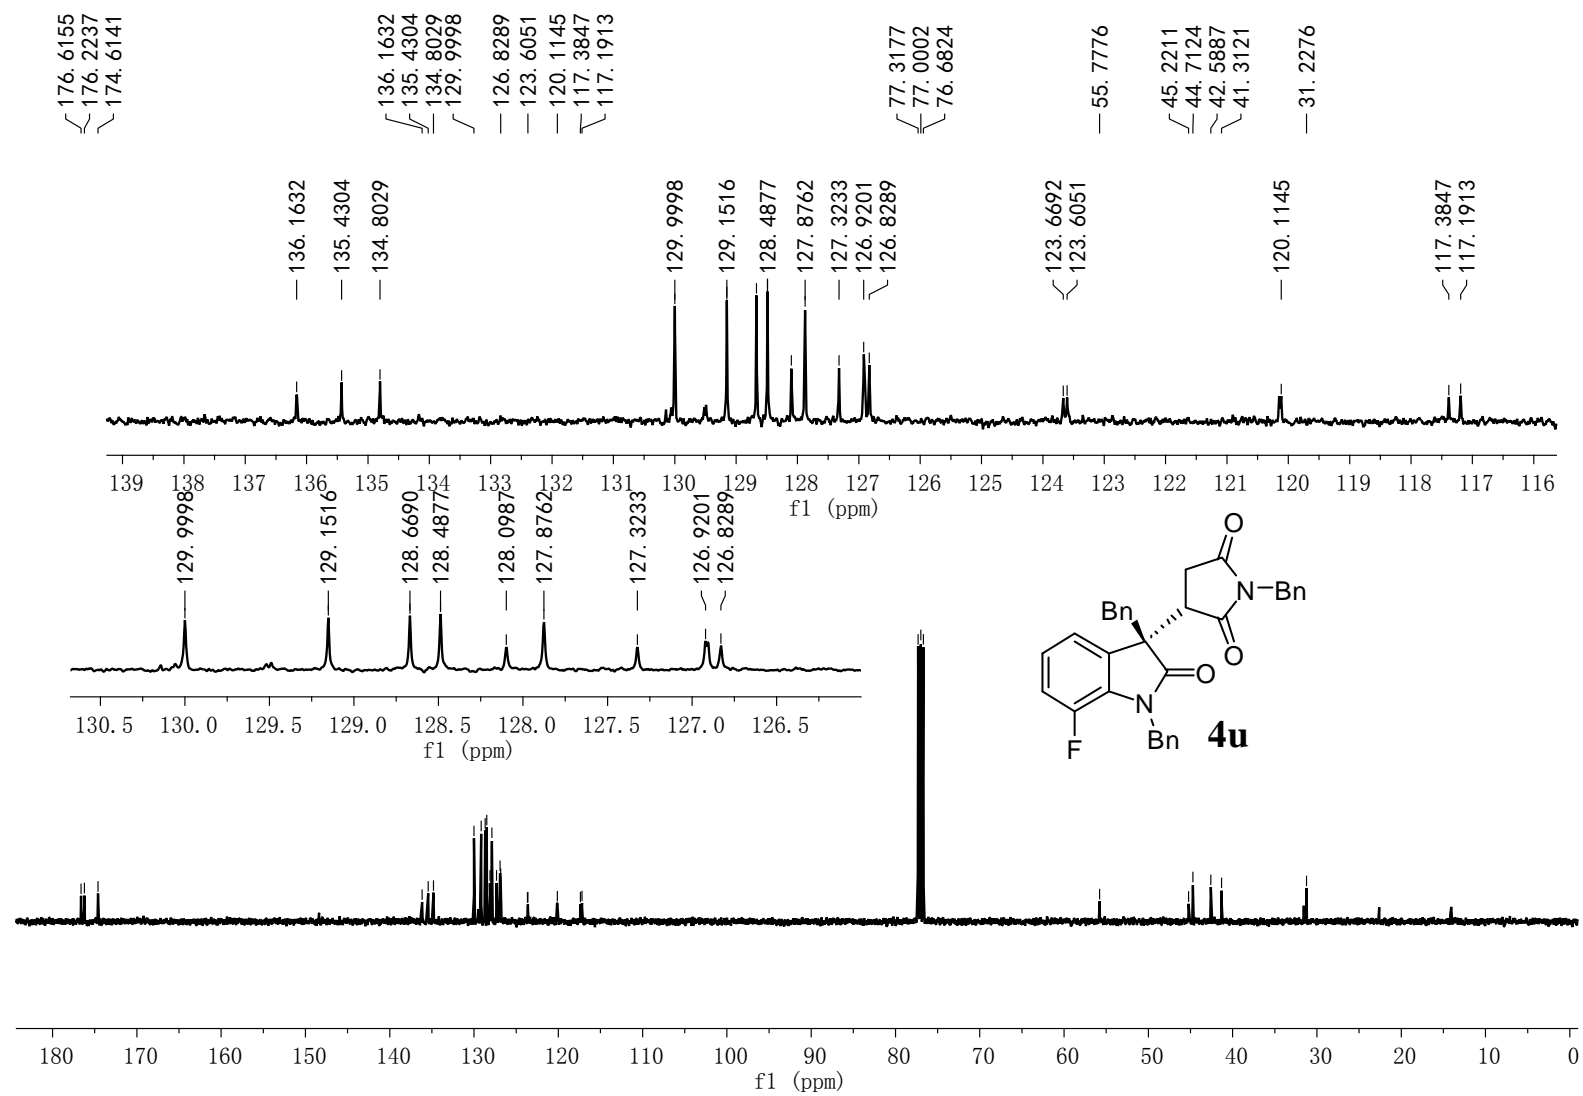

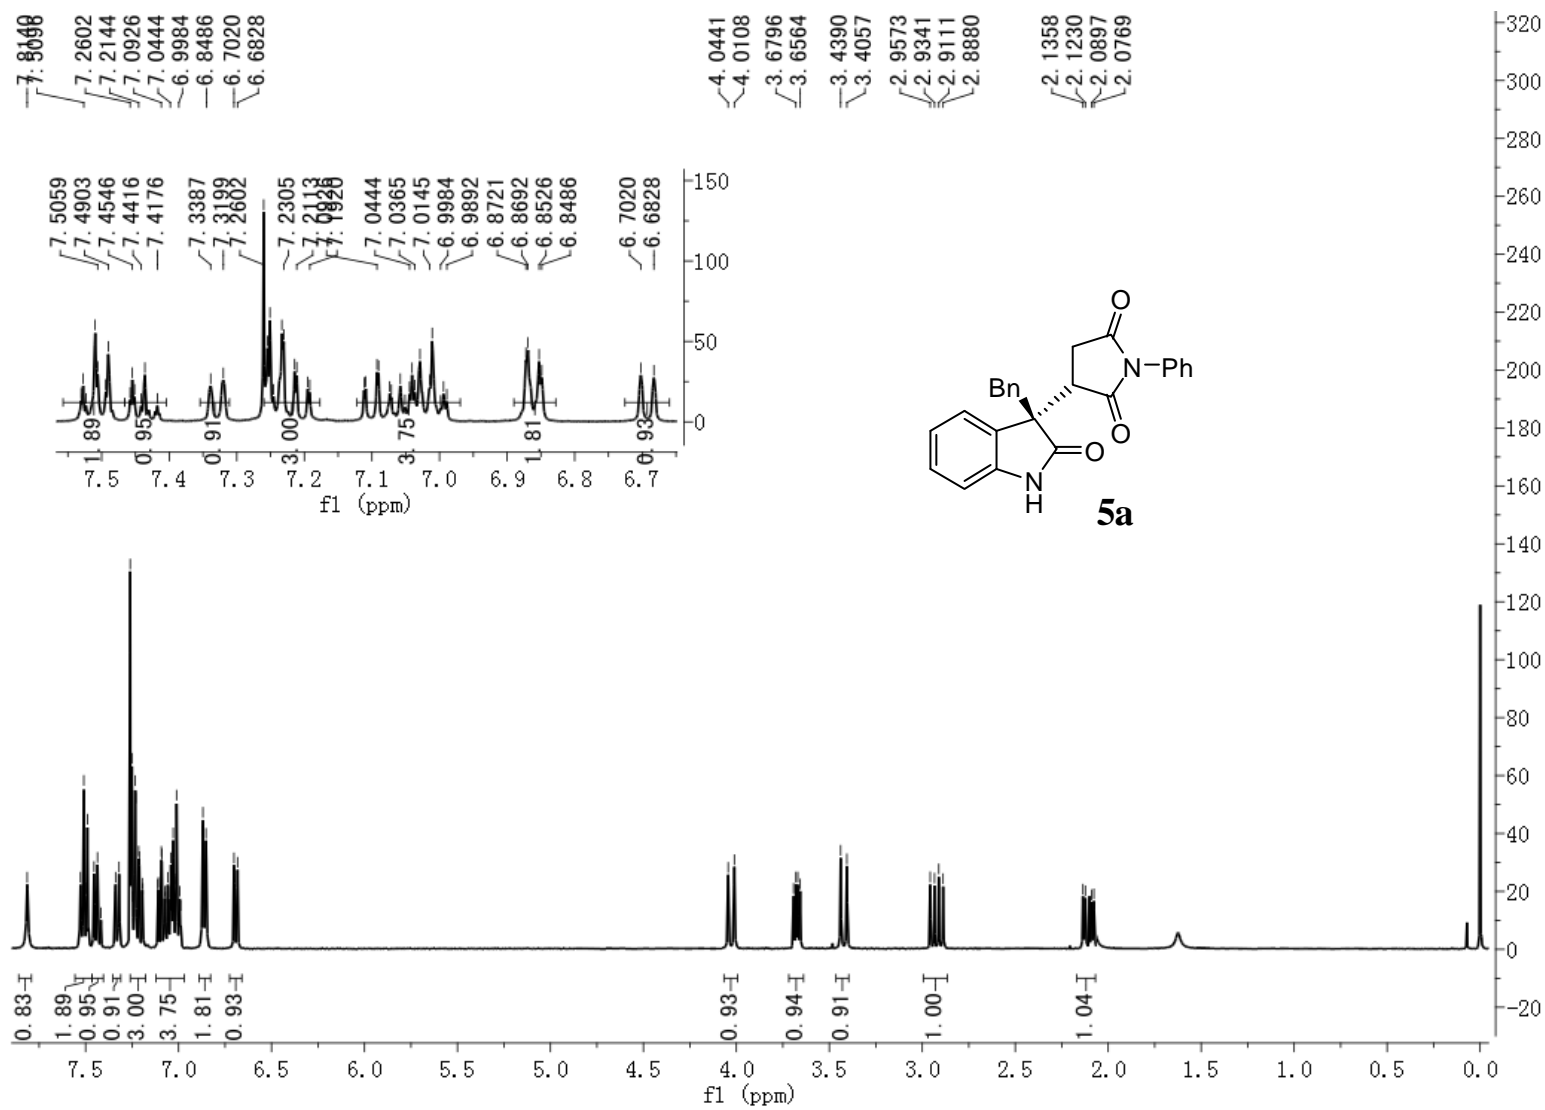

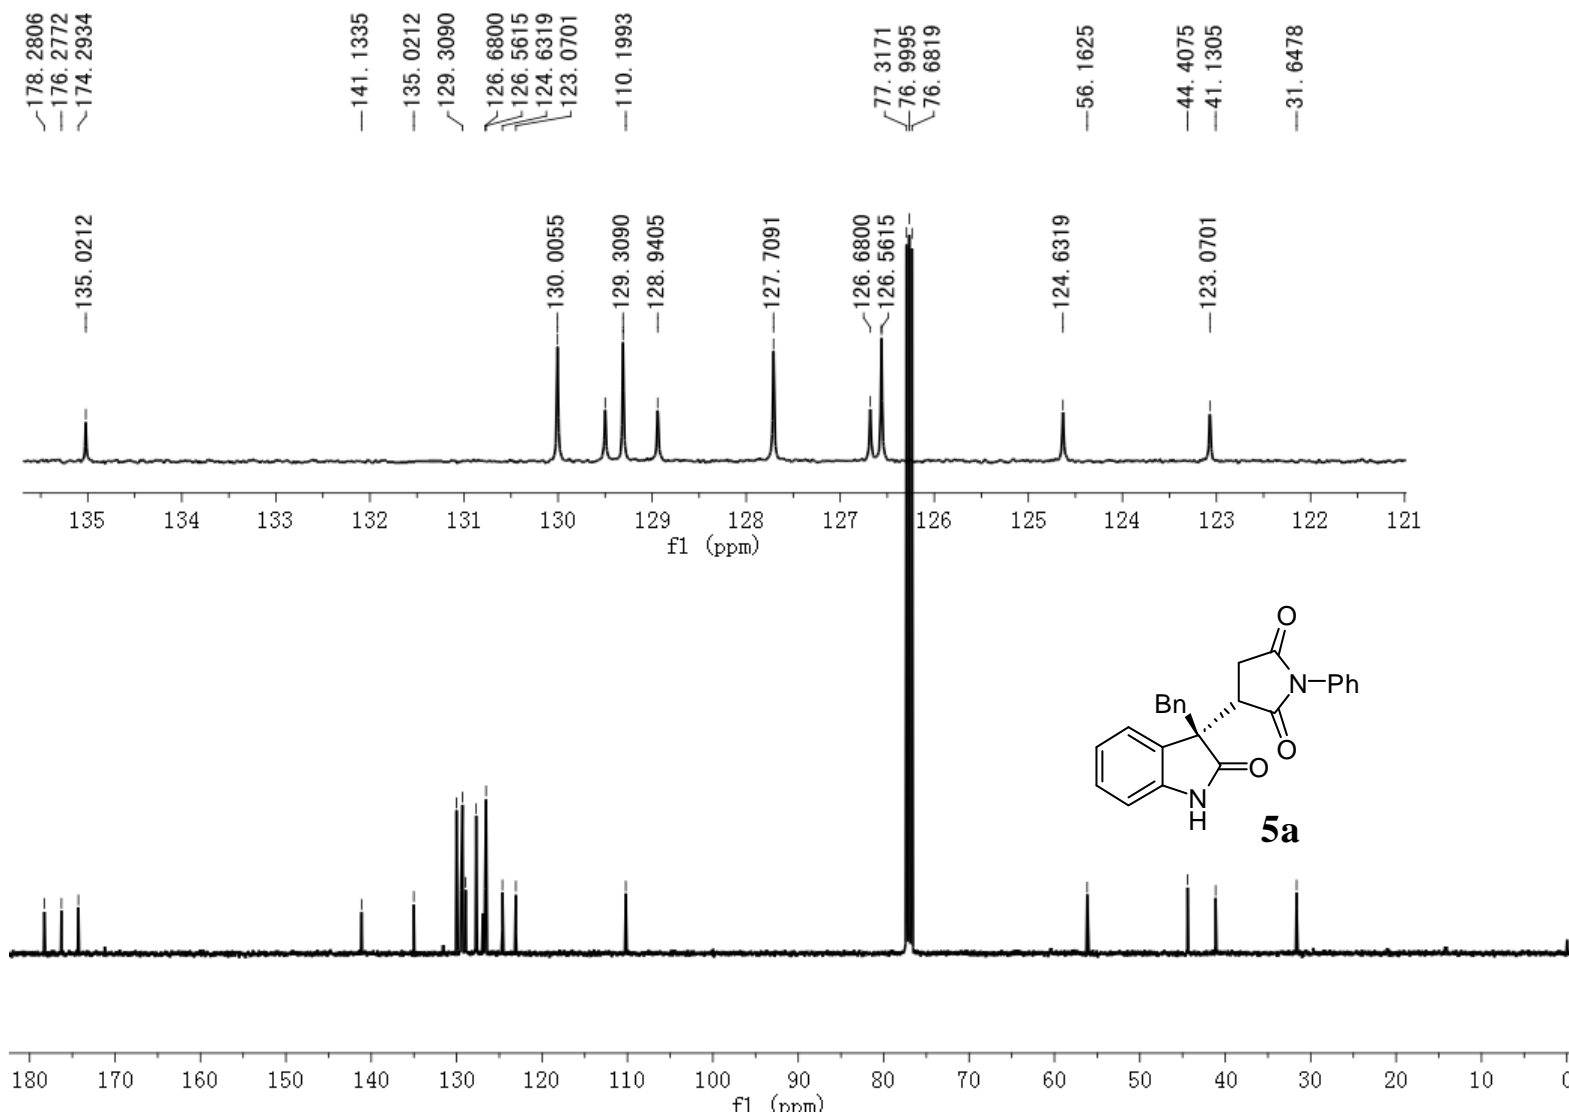

Supplement: c2cc31587d.pdf [file c2cc31587d.pdf]
